# Supplementary material for: Identification of Potential Gene Targets for Suppressing Oviposition in Holotrichia parallela Using Comparative Transcriptome Analysis
Source: Int J Mol Sci. 2023 Aug 24;24(17):13138. doi: 10.3390/ijms241713138 (PMC10487570; doi:10.3390/ijms241713138)
Supplement: Supplementary file 1 [file ijms-24-13138-s001.zip › Supplementary_Material_Tables.xlsx]

## Sheet: Table S1
Table S1. Primers used for this study.
Name of Primers	Primer sequences
Fcp3C-F	ATGTATTGCAAAATATTGTTC
Fcp3C-R	TTATGATGCAGAAGGACATTT
qPCR-Vtg-F	ACACGTTTTTGGCAGTTTCC
qPCR-Vtg-R	GCTTCTTCGACGGATTCTTG
qPCR-VgR-F	TGGCGAAGACGAGAAAAACT
qPCR-VgR-R	TCGTCCGACAAATCGTAACA
qPCR-FoxL2-F	CAGCAGCCTATACGCAACAA
qPCR-FoxL2-R	AGGAGGCCAATAAGCTGGAT
qPCR-GAPDH-F	TCCAAAGAACATCCCGTGGG
qPCR-GAPDH-F	TTTGCGCCGCCTTCTAAATG
qPCR-Fcp3C-F	CGCCGTTGGAATTAGACAAT
qPCR-Fcp3C-R	GCACGCTCTTTGTAGCAATC
L4440-dsFcp3c-F	GGCCTCTAGAACCGAAGTTGGAAATGAGAT
L4440- dsFcp3c-R	GGCCAAGCTTTTATGATGCAGAAGGACATT

## Sheet: Table S2
Table S2. CleanData_Qcsummary
Sample	Raw Reads	Clean Reads	Clean Bases	Error(%)	Q20(%)	Q30(%)	GC Content(%)
OS1	54002662	51305476	7.7G	0.02	95.71	91.14	37.56
OS2	52195758	49510722	7.43G	0.02	95.64	90.96	37.58
OS3	52361316	49871944	7.48G	0.02	95.74	91.15	37
TS1	64500316	61195670	9.18G	0.02	95.69	91.05	39.65
TS2	47169530	45834164	6.88G	0.02	96.76	92.52	39.97
TS3	65500174	62028906	9.3G	0.02	95.77	91.22	39.34
OU1	60998952	58153688	8.72G	0.02	95.62	90.85	36.87
OU2	64020812	61160506	9.17G	0.02	96.16	91.81	36.63
OU3	57897924	55651076	8.35G	0.02	96.42	92.37	36.69
TU1	61204402	58774844	8.82G	0.02	96.43	92.35	38.38
TU2	57926602	55701860	8.36G	0.02	96.4	92.29	39
TU3	57066614	54819126	8.22G	0.02	96.38	92.26	38.71
OL1	57075994	54645350	8.2G	0.02	95.39	89.82	37.56
OL2	50651766	48451652	7.27G	0.02	95.56	90.15	37.43
OL3	68363678	67340234	10.1G	0.01	97.9	94.52	37.63

## Sheet: Table S3
Table S3. Details of transcriptome assembly and annotation of Holotrichia parallela
Type	Value
Total number of unigenes	243432
Average length (bp)	556
N50 (bp)	708
Number of unigenes annotated in NR	60190
Number of unigenes annotated in NT	29278
Number of unigenes annotated in KO	18007
Number of unigenes annotated in SwissProt	37023
Number of unigenes annotated in Pfam	42094
Number of unigenes annotated in GO	43133
Number of unigenes annotated in KOG	16898
Total number of unigenes annotated	246623

## Sheet: Table S4
Table S4. downregulated genes in both treatments (OSvsOU_OLvsOU)
gene_id	Gene Length	NR Description
TRINITY_DN43779_c0_g1	1198	photosystem II D1 protein [Lotharella sp. CCMP622]
TRINITY_DN53733_c0_g1	672	PREDICTED: uncharacterized protein LOC100141766 [Tribolium castaneum]
TRINITY_DN57297_c0_g1	569	--
TRINITY_DN57502_c0_g1	1347	--
TRINITY_DN59616_c0_g1	534	PREDICTED: protein C10 [Tribolium castaneum]
TRINITY_DN60514_c0_g1	448	hypothetical protein TcasGA2_TC007084 [Tribolium castaneum]
TRINITY_DN60744_c0_g1	500	OBP22 [Holotrichia parallela]
TRINITY_DN62420_c0_g1	900	PREDICTED: trypsin-like [Bactrocera cucurbitae]
TRINITY_DN62456_c0_g3	890	PREDICTED: rhabdoid tumor deletion region protein 1 [Tribolium castaneum]
TRINITY_DN62928_c0_g1	2646	--
TRINITY_DN62959_c0_g1	2538	--
TRINITY_DN63340_c0_g1	400	--
TRINITY_DN63486_c0_g1	729	--
TRINITY_DN63818_c0_g1	611	--
TRINITY_DN63952_c0_g1	1114	GNBP1 [Tenebrio molitor]
TRINITY_DN64754_c5_g9	1317	PREDICTED: alcohol dehydrogenase class-3-like [Astyanax mexicanus]
TRINITY_DN65343_c8_g1	1004	hypothetical protein YQE_12482, partial [Dendroctonus ponderosae]>gi|546672259|gb|ERL84201.1| hypothetical protein D910_01579 [Dendroctonus ponderosae]>gi|546673841|gb|ERL85375.1| hypothetical protein D910_02795 [Dendroctonus ponderosae]>gi|546680040|gb|ERL90395.1| hypothetical protein D910_07744 [Dendroctonus ponderosae]
TRINITY_DN65559_c1_g2	872	--
TRINITY_DN66136_c2_g1	2513	P700 apoprotein subunit Ia [Bigelowiella natans]>gi|115443566|ref|YP_778585.1| P700 apoprotein subunit Ia [Bigelowiella natans]>gi|122246279|sp|Q06J42.1|PSAA_BIGNA RecName: Full=Photosystem I P700 chlorophyll a apoprotein A1; AltName: Full=PSI-A; AltName: Full=PsaA (chloroplast) [Bigelowiella natans]>gi|110810202|gb|ABG91408.1| P700 apoprotein subunit Ia [Bigelowiella natans]>gi|110810211|gb|ABG9…
TRINITY_DN66136_c2_g6	1627	photosystem II D2 protein [Lotharella sp. CCMP622]
TRINITY_DN66251_c9_g1	2742	PREDICTED: uncharacterized protein LOC103505668 [Diaphorina citri]
TRINITY_DN66337_c2_g4	552	--
TRINITY_DN66623_c0_g1	906	AGAP002521-PA [Anopheles gambiae str. PEST]>gi|347968007|ref|XP_003436144.1| AGAP002521-PB [Anopheles gambiae str. PEST]>gi|333468205|gb|EAA07469.4| AGAP002521-PA [Anopheles gambiae str. PEST]>gi|333468206|gb|EGK96869.1| AGAP002521-PB [Anopheles gambiae str. PEST]
TRINITY_DN67700_c0_g1	1542	--
TRINITY_DN67956_c7_g5	662	NADH dehydrogenase subunit 1 (mitochondrion) [Protaetia brevitarsis]>gi|507474560|gb|AGM48375.1| NADH dehydrogenase subunit 1 (mitochondrion) [Protaetia brevitarsis]
TRINITY_DN67956_c7_g6	765	cytochrome b [Rhopaea magnicornis]>gi|226934969|gb|ACO92575.1| cytochrome b [Rhopaea magnicornis]
TRINITY_DN67959_c2_g3	895	hypothetical protein TcasGA2_TC013840 [Tribolium castaneum]
TRINITY_DN69063_c2_g1	1608	PREDICTED: putative acyl-CoA-binding protein [Tribolium castaneum]>gi|270013947|gb|EFA10395.1| hypothetical protein TcasGA2_TC012626 [Tribolium castaneum]
TRINITY_DN69241_c0_g1	1491	PREDICTED: protein lethal(2)essential for life [Tribolium castaneum]>gi|270012628|gb|EFA09076.1| hypothetical protein TcasGA2_TC006793 [Tribolium castaneum]
TRINITY_DN69485_c3_g1	606	beta-glucosidase precursor [Tenebrio molitor]
TRINITY_DN69688_c1_g6	2034	--
TRINITY_DN70521_c0_g1	307	NADH dehydrogenase subunit 3 [Priasilpha obscura]>gi|194241664|gb|ACF35114.1| NADH dehydrogenase subunit 3 [Priasilpha obscura]
TRINITY_DN70664_c0_g1	781	PREDICTED: uncharacterized protein LOC103315107 [Tribolium castaneum]>gi|642913844|ref|XP_008201183.1| PREDICTED: uncharacterized protein LOC103315107 [Tribolium castaneum]
TRINITY_DN71067_c1_g3	603	NADH dehydrogenase subunit 2 [Rhopaea magnicornis]>gi|226934958|gb|ACO92564.1| NADH dehydrogenase subunit 2 [Rhopaea magnicornis]
TRINITY_DN71408_c1_g1	1859	PREDICTED: acyl-CoA synthetase family member 2, mitochondrial [Tribolium castaneum]>gi|270013541|gb|EFA09989.1| hypothetical protein TcasGA2_TC012154 [Tribolium castaneum]
TRINITY_DN72732_c1_g1	1296	PREDICTED: uncharacterized protein LOC660583 [Tribolium castaneum]>gi|270001890|gb|EEZ98337.1| hypothetical protein TcasGA2_TC000791 [Tribolium castaneum]
TRINITY_DN73151_c3_g4	667	--
TRINITY_DN73826_c1_g1	1434	luciferin-regenerating enzyme, partial [Pachnoda marginata peregrina]
TRINITY_DN75119_c1_g2	492	--
TRINITY_DN75798_c4_g6	635	--
TRINITY_DN75974_c6_g1	781	PREDICTED: uncharacterized protein LOC103313125 [Tribolium castaneum]
TRINITY_DN76127_c1_g1	1442	PREDICTED: serine protease 42 [Tribolium castaneum]>gi|270002734|gb|EEZ99181.1| serine protease H2 [Tribolium castaneum]
TRINITY_DN76990_c0_g1	4100	--
TRINITY_DN77153_c2_g1	2634	hypothetical protein TcasGA2_TC012551 [Tribolium castaneum]
TRINITY_DN77214_c4_g2	1973	PREDICTED: probable uridine nucleosidase 1 [Tribolium castaneum]>gi|270007493|gb|EFA03941.1| hypothetical protein TcasGA2_TC014082 [Tribolium castaneum]
TRINITY_DN77427_c0_g1	4419	PREDICTED: vitellogenin [Tribolium castaneum]>gi|270014854|gb|EFA11302.1| hypothetical protein TcasGA2_TC010839 [Tribolium castaneum]
TRINITY_DN77427_c0_g2	445	vitellogenin 2 [Nicrophorus orbicollis]
TRINITY_DN77427_c0_g3	694	PREDICTED: vitellogenin [Tribolium castaneum]>gi|270014854|gb|EFA11302.1| hypothetical protein TcasGA2_TC010839 [Tribolium castaneum]
TRINITY_DN77526_c1_g1	2270	hypothetical protein TcasGA2_TC016101 [Tribolium castaneum]
TRINITY_DN77735_c3_g4	497	cytochrome oxidase subunit II [Nanos peyrierasi]
TRINITY_DN77912_c0_g1	1074	--
TRINITY_DN78227_c0_g2	763	PREDICTED: pathogenesis-related protein 5 [Tribolium castaneum]>gi|270001655|gb|EEZ98102.1| hypothetical protein TcasGA2_TC000515 [Tribolium castaneum]
TRINITY_DN78633_c0_g3	2503	vacuolar amino acid transporter, putative [Pediculus humanus corporis]>gi|212505775|gb|EEB10155.1| vacuolar amino acid transporter, putative [Pediculus humanus corporis]
TRINITY_DN80245_c0_g1	2003	PREDICTED: UDP-glucuronosyltransferase 2B14-like [Tribolium castaneum]>gi|642919239|ref|XP_008191789.1| PREDICTED: UDP-glucuronosyltransferase 2B14-like [Tribolium castaneum]
TRINITY_DN80668_c0_g1	444	PREDICTED: coiled-coil-helix-coiled-coil-helix domain-containing protein 10, mitochondrial [Tribolium castaneum]
TRINITY_DN81639_c0_g1	1540	PREDICTED: lipase 3 [Tribolium castaneum]>gi|270005168|gb|EFA01616.1| hypothetical protein TcasGA2_TC007185 [Tribolium castaneum]
TRINITY_DN81677_c3_g1	2010	PREDICTED: alanine--glyoxylate aminotransferase 2, mitochondrial [Tribolium castaneum]
TRINITY_DN83429_c5_g1	1586	PREDICTED: cytochrome b5-related protein-like [Tribolium castaneum]
TRINITY_DN83538_c3_g2	2591	PREDICTED: venom carboxylesterase-6 [Tribolium castaneum]>gi|270008700|gb|EFA05148.1| hypothetical protein TcasGA2_TC015265 [Tribolium castaneum]
TRINITY_DN84256_c3_g2	1900	Zonadhesin, partial [Stegodyphus mimosarum]
TRINITY_DN84779_c4_g1	1178	PREDICTED: gamma-interferon-inducible lysosomal thiol reductase-like isoform X2 [Tribolium castaneum]>gi|270001363|gb|EEZ97810.1| hypothetical protein TcasGA2_TC000174 [Tribolium castaneum]
TRINITY_DN85027_c0_g1	1219	hypothetical protein YQE_02792, partial [Dendroctonus ponderosae]
TRINITY_DN85027_c0_g2	4482	serine protease P19 [Tribolium castaneum]
TRINITY_DN85129_c5_g1	533	hypothetical protein D910_08493 [Dendroctonus ponderosae]
TRINITY_DN85977_c0_g2	1103	--

## Sheet: Table S5
Table S5. Top20 of DEG_enriched_KEGG_pathway in OSvsOU
pathway_term	rich_factor	qvalue	gene_number
Systemic lupus erythematosus	0.0680628	6.32e-09	13
Allograft rejection	0.15625	4.61e-05	5
Autoimmune thyroid disease	0.151515	4.61e-05	5
Alcoholism	0.0375	0.000157	9
Asthma	0.181818	0.000169	4
Graft-versus-host disease	0.148148	0.00029	4
Intestinal immune network for IgA production	0.137931	0.000321	4
Parkinson"'"s disease	0.0193861	0.001465	12
Type I diabetes mellitus	0.0727273	0.002493	4
Antigen processing and presentation	0.0281125	0.003625	7
Oxidative phosphorylation	0.0178862	0.003906	11
Cardiac muscle contraction	0.0264151	0.004326	7
Viral myocarditis	0.037037	0.005743	5
Inflammatory bowel disease (IBD)	0.0697674	0.010999	3
Cell adhesion molecules (CAMs)	0.0412371	0.011313	4
Staphylococcus aureus infection	0.0392157	0.012645	4
Leishmaniasis	0.0344828	0.018596	4
Viral carcinogenesis	0.0181347	0.022923	7
African trypanosomiasis	0.0833333	0.036394	2
Rheumatoid arthritis	0.0253165	0.044924	4

## Sheet: Table S6
Table S6. Top20 of DEG_enriched_KEGG_pathway in OLvsOU
pathway_term	rich_factor	qvalue	gene_number
Basal transcription factors	0.339623	1.08e-05	18
DNA replication	0.283019	0.00036	15
Pyrimidine metabolism	0.151659	0.00036	32
SNARE interactions in vesicular transport	0.352941	0.00036	12
Fatty acid elongation	0.242424	0.000502	16
Cell cycle	0.14554	0.000643	31
Ribosome biogenesis in eukaryotes	0.153846	0.002282	24
Fanconi anemia pathway	0.294118	0.003765	10
RNA polymerase	0.224138	0.003765	13
Homologous recombination	0.363636	0.004651	8
Purine metabolism	0.110482	0.006808	39
Aminoacyl-tRNA biosynthesis	0.150376	0.006808	20
Nucleotide excision repair	0.189189	0.006808	14
Mismatch repair	0.258065	0.022454	8
Ubiquitin mediated proteolysis	0.105839	0.051019	29
Progesterone-mediated oocyte maturation	0.131783	0.051019	17
Sulfur relay system	0.333333	0.065114	5
Protein export	0.151899	0.066013	12
Cytosolic DNA-sensing pathway	0.18	0.070956	9
p53 signaling pathway	0.139535	0.107699	12

## Sheet: TableS7
Table S7. OSvsOU down
gene_id	OS_readcount	OU_readcount	log2FoldChange	pval	padj
TRINITY_DN84256_c3_g2	298.35	1033.73	-1.7928	1.2632e-11	6.5902e-08		-1.79279
TRINITY_DN72732_c1_g1	52.2595	188.642	-1.8519	7.2352e-11	3.2371e-07		-1.85189
TRINITY_DN65559_c1_g2	22.1223	177.943	-3.0078	1.6082e-10	6.6543e-07		-3.00784
TRINITY_DN60514_c0_g1	226.508	557.302	-1.2989	7.8584e-10	2.9467e-06		-1.2989
TRINITY_DN75798_c4_g6	824.888	1860.38	-1.1733	8.1063e-10	2.9476e-06		-1.17333
TRINITY_DN66251_c9_g1	13.8028	76.1617	-2.4641	9.1199e-10	3.2186e-06		-2.4641
TRINITY_DN70521_c0_g1	1779.5	4406.49	-1.3082	1.2598e-09	4.3191e-06		-1.30816
TRINITY_DN81677_c3_g1	5.53371	46.3347	-3.0658	2.3469e-09	7.611e-06		-3.06577
TRINITY_DN62420_c0_g1	23.0834	152.813	-2.7268	3.1317e-09	9.6354e-06		-2.72684
TRINITY_DN73151_c3_g4	939.614	5472.05	-2.5419	3.2649e-09	9.7941e-06		-2.54194
TRINITY_DN67956_c7_g6	6057.11	12360.8	-1.0291	2.1169e-08	5.4045e-05		-1.02907
TRINITY_DN85129_c5_g1	115.081	297.874	-1.372	3.4539e-08	7.97e-05		-1.37205
TRINITY_DN71067_c1_g3	2913.32	5827.97	-1.0003	6.8576e-08	0.00014436		-1.00033
TRINITY_DN85027_c0_g2	389.474	1005.45	-1.3682	6.8508e-08	0.00014436		-1.36824
TRINITY_DN66623_c0_g1	26.1766	154.646	-2.5626	8.255e-08	0.00017078		-2.56262
TRINITY_DN83429_c5_g1	25.5455	102.341	-2.0022	1.0583e-07	0.00021523		-2.00224
TRINITY_DN79770_c0_g1	19.6064	75.6106	-1.9473	1.2792e-07	0.00025582		-1.94726
TRINITY_DN77427_c0_g2	1468.37	9132.33	-2.6368	1.8772e-07	0.0003633		-2.63676
TRINITY_DN65343_c8_g1	11.5287	54.4806	-2.2405	1.9615e-07	0.00036776		-2.24051
TRINITY_DN76127_c1_g1	30.16	106.428	-1.8192	2.0818e-07	0.00037284		-1.81917
TRINITY_DN69241_c0_g1	165.432	370.141	-1.1618	2.413e-07	0.00042579		-1.16184
TRINITY_DN63818_c0_g1	13.4595	61.731	-2.1974	2.523e-07	0.00042981		-2.19737
TRINITY_DN71511_c1_g2	31.762	109.279	-1.7826	5.2701e-07	0.00080048		-1.78264
TRINITY_DN53733_c0_g1	1303.01	11085.2	-3.0887	5.7095e-07	0.0008458		-3.08872
TRINITY_DN63340_c0_g1	4.63691	32.9141	-2.8275	1.0093e-06	0.0014248		-2.82747
TRINITY_DN72075_c1_g1	21.6471	73.7912	-1.7693	1.2173e-06	0.0016985		-1.76927
TRINITY_DN57502_c0_g1	1.2781	26.0295	-4.3481	1.5198e-06	0.002049		-4.34807
TRINITY_DN43779_c0_g1	0	965.378	#NAME?	1.6085e-06	0.0021446		#NUM!
TRINITY_DN66337_c2_g4	1258.01	2339.37	-0.89498	2.0193e-06	0.0026131		-0.894975
TRINITY_DN77153_c2_g1	32.2163	128.22	-1.9928	2.0186e-06	0.0026131		-1.99276
TRINITY_DN85977_c0_g2	3.39186	39.9356	-3.5575	2.0252e-06	0.0026131		-3.55753
TRINITY_DN69485_c3_g1	23.7156	259.786	-3.4534	2.2894e-06	0.0029225		-3.45342
TRINITY_DN67700_c0_g1	158.075	487.446	-1.6246	2.5031e-06	0.0031616		-1.62463
TRINITY_DN76562_c2_g1	49.0382	173.822	-1.8256	2.6213e-06	0.0032549		-1.82564
TRINITY_DN78633_c0_g3	1.66287	21.579	-3.6979	2.6312e-06	0.0032549		-3.69788
TRINITY_DN85027_c0_g1	38.8087	106.224	-1.4527	2.7617e-06	0.0033815		-1.45265
TRINITY_DN63815_c0_g1	10.1845	45.7234	-2.1666	2.8264e-06	0.0034257		-2.16656
TRINITY_DN77912_c0_g1	131.825	510.306	-1.9527	3.0829e-06	0.0036993		-1.95274
TRINITY_DN77214_c4_g2	40.0604	107.529	-1.4245	3.2148e-06	0.0037819		-1.42447
TRINITY_DN67959_c2_g3	13.3658	944.689	-6.1432	5.3318e-06	0.0060357		-6.14322
TRINITY_DN77427_c0_g1	8059.21	48099.2	-2.5773	5.8963e-06	0.0066123		-2.5773
TRINITY_DN75974_c6_g1	51.5314	164.592	-1.6754	6.6326e-06	0.0072082		-1.67537
TRINITY_DN80245_c0_g1	11.177	49.3137	-2.1415	6.668e-06	0.0072082		-2.14145
TRINITY_DN63486_c0_g1	19.4269	87.394	-2.1695	6.9868e-06	0.0074262		-2.16948
TRINITY_DN69688_c1_g6	59.9158	141.29	-1.2377	7.6274e-06	0.0080284		-1.23765
TRINITY_DN77735_c3_g4	10662.2	18669.7	-0.80819	8.5902e-06	0.0088858		-0.808187
TRINITY_DN77427_c0_g3	664.584	4635.86	-2.8023	9.641e-06	0.0097215		-2.80231
TRINITY_DN62959_c0_g1	0	401.162	#NAME?	1.0031e-05	0.01003		#NUM!
TRINITY_DN60501_c0_g1	18.0999	116.11	-2.6814	1.3041e-05	0.01262		-2.68144
TRINITY_DN62456_c0_g3	74.0667	392.683	-2.4065	1.2984e-05	0.01262		-2.40647
TRINITY_DN77526_c1_g1	34.6296	181.748	-2.3919	1.3504e-05	0.012963		-2.39186
TRINITY_DN84779_c4_g1	8.13687	50.264	-2.627	1.3821e-05	0.013162		-2.62698
TRINITY_DN71466_c2_g6	0	268.582	#NAME?	1.8161e-05	0.016893		#NUM!
TRINITY_DN62928_c0_g1	0	310.453	#NAME?	2.0051e-05	0.018349		#NUM!
TRINITY_DN80668_c0_g1	458.289	856.524	-0.90223	2.002e-05	0.018349		-0.902235
TRINITY_DN81639_c0_g1	13.2108	62.4103	-2.2401	2.0185e-05	0.018349		-2.24007
TRINITY_DN60744_c0_g1	2.30366	47.0928	-4.3535	2.0735e-05	0.018707		-4.35351
TRINITY_DN71408_c1_g1	7.18089	55.4437	-2.9488	2.3835e-05	0.021029		-2.94879
TRINITY_DN85066_c1_g5	113.758	293.322	-1.3665	2.6048e-05	0.022815		-1.36652
TRINITY_DN83538_c3_g2	18.645	63.1043	-1.759	2.6918e-05	0.023406		-1.75895
TRINITY_DN68413_c2_g3	0	211.83	#NAME?	3.3057e-05	0.027934		#NUM!
TRINITY_DN63952_c0_g1	9.62025	38.5155	-2.0013	3.3993e-05	0.028524		-2.0013
TRINITY_DN57297_c0_g1	43.9069	238.597	-2.4421	3.4234e-05	0.028527		-2.44206
TRINITY_DN80941_c2_g1	3.20047	23.2012	-2.8578	3.4701e-05	0.028611		-2.85784
TRINITY_DN85365_c1_g1	17.4315	54.7952	-1.6524	4.157e-05	0.03308		-1.65235
TRINITY_DN74861_c1_g2	41.6712	100.08	-1.264	4.1953e-05	0.033119		-1.26403
TRINITY_DN64754_c5_g9	0	165.517	#NAME?	4.7905e-05	0.037326		#NUM!
TRINITY_DN69081_c2_g1	0	67.6657	#NAME?	5.0042e-05	0.038491		#NUM!
TRINITY_DN73826_c1_g1	21.8211	62.5978	-1.5204	4.9825e-05	0.038491		-1.52039
TRINITY_DN67956_c7_g5	8113.16	16034.2	-0.98282	5.1549e-05	0.039316		-0.98282
TRINITY_DN69063_c2_g1	771.064	1645.14	-1.0933	5.6055e-05	0.042039		-1.09329
TRINITY_DN66136_c2_g6	0	148.865	#NAME?	5.6813e-05	0.042343		#NUM!
TRINITY_DN66136_c2_g1	0	150.631	#NAME?	5.8231e-05	0.043132		#NUM!
TRINITY_DN76990_c0_g1	304.697	4555.93	-3.9023	5.8879e-05	0.043344		-3.9023
TRINITY_DN64592_c0_g1	0	144.206	#NAME?	6.0163e-05	0.044019		#NUM!
TRINITY_DN64666_c1_g1	6.27019	80.7877	-3.6876	6.1077e-05	0.044417		-3.68755
TRINITY_DN78227_c0_g2	38.5051	91.4435	-1.2478	6.648e-05	0.047767		-1.24783
TRINITY_DN70664_c0_g1	4.03264	23.8805	-2.566	6.7833e-05	0.048449		-2.56604
TRINITY_DN64542_c0_g1	19.1326	81.4664	-2.0902	6.9508e-05	0.049164		-2.09017
TRINITY_DN75119_c1_g2	43.2152	111.421	-1.3664	6.9653e-05	0.049164		-1.36642
TRINITY_DN59616_c0_g1	442.492	764.087	-0.78809	7.0722e-05	0.049627		-0.788085
OLvsOU down
gene_id	OL_readcount	OU_readcount	log2FoldChange	pval	padj
TRINITY_DN70100_c1_g3	65.4485	2159.28	-5.04404	2.6662e-90	3.5195e-85		-5.04404
TRINITY_DN86456_c4_g1	1864.63	26306.4	-3.81846	2.1091e-60	1.3921e-55		-3.81846
TRINITY_DN85027_c0_g2	16.5395	1213.15	-6.19669	1.5147e-57	6.6649e-53		-6.19669
TRINITY_DN75218_c0_g1	345.04	4169.05	-3.59488	3.1931e-57	1.0538e-52		-3.59488
TRINITY_DN84252_c0_g1	974.782	10269.3	-3.39712	3.5947e-49	9.4906e-45		-3.39712
TRINITY_DN85899_c2_g2	1635.71	19405	-3.56844	1.3092e-40	2.8803e-36		-3.56844
TRINITY_DN83206_c2_g1	316.465	2242.58	-2.82504	6.1716e-37	1.1638e-32		-2.82504
TRINITY_DN72015_c2_g1	4382.93	27307.2	-2.63932	4.1795e-35	6.8965e-31		-2.63932
TRINITY_DN84616_c1_g3	90.8114	706.347	-2.95943	7.7974e-35	1.1437e-30		-2.95943
TRINITY_DN83615_c0_g3	603.165	12589.2	-4.38349	1.6425e-33	2.1683e-29		-4.38349
TRINITY_DN85899_c2_g4	118.742	1081.04	-3.18652	1.8588e-33	2.2307e-29		-3.18652
TRINITY_DN69688_c1_g6	2.16329	170.551	-6.30083	7.2222e-33	7.9449e-29		-6.30083
TRINITY_DN85899_c2_g5	194.259	1673.97	-3.10722	3.5212e-32	3.5755e-28		-3.10722
TRINITY_DN83468_c3_g2	449.333	2394.6	-2.41393	4.151e-29	3.914e-25		-2.41393
TRINITY_DN82400_c0_g2	111.39	1806.43	-4.01945	4.7844e-29	4.2105e-25		-4.01945
TRINITY_DN85027_c0_g1	3.08936	128.231	-5.37529	5.6166e-27	4.634e-23		-5.37529
TRINITY_DN83168_c0_g2	65.299	1880.09	-4.84759	1.831e-23	1.3428e-19		-4.84759
TRINITY_DN84616_c1_g2	122.844	1064.83	-3.11573	2.0483e-23	1.4231e-19		-3.11573
TRINITY_DN82851_c1_g1	3.20335	88.4385	-4.78702	3.6146e-23	2.3858e-19		-4.78702
TRINITY_DN87140_c1_g1	136.421	1097.89	-3.00859	1.973e-22	1.2403e-18		-3.00859
TRINITY_DN77717_c3_g1	10252.1	52962.1	-2.36904	6.6634e-21	3.9982e-17		-2.36904
TRINITY_DN76380_c6_g1	9.95785	114.27	-3.52047	1.2487e-20	7.1666e-17		-3.52047
TRINITY_DN72543_c0_g1	6.93028	124.79	-4.17044	1.8445e-20	9.7395e-17		-4.17044
TRINITY_DN77427_c0_g2	152.669	10982.2	-6.16861	4.8221e-20	2.3576e-16		-6.16861
TRINITY_DN83265_c3_g1	55.8481	303.063	-2.44004	1.0273e-19	4.8434e-16		-2.44004
TRINITY_DN69678_c0_g1	423.123	1629.15	-1.94497	1.9157e-19	8.4297e-16		-1.94497
TRINITY_DN82871_c5_g4	43.2845	245.66	-2.50474	2.3212e-19	9.8843e-16		-2.50474
TRINITY_DN77214_c4_g2	15.7737	129.264	-3.03473	2.1909e-18	8.5061e-15		-3.03473
TRINITY_DN69033_c1_g1	211.505	809.22	-1.93584	6.0461e-18	2.2804e-14		-1.93584
TRINITY_DN83260_c3_g1	185.584	1367.62	-2.88152	7.2722e-18	2.6666e-14		-2.88152
TRINITY_DN84786_c1_g1	299.247	1081.08	-1.85307	2.609e-17	9.3083e-14		-1.85307
TRINITY_DN75798_c4_g6	655.524	2243.98	-1.77534	3.1974e-17	1.1086e-13		-1.77534
TRINITY_DN71067_c1_g3	2145.38	7028.64	-1.71201	5.3106e-17	1.7098e-13		-1.71201
TRINITY_DN74818_c0_g5	410.197	1425.35	-1.79693	1.365e-16	4.2903e-13		-1.79693
TRINITY_DN70521_c0_g1	1566.9	5306.49	-1.75984	1.8813e-16	5.7756e-13		-1.75984
TRINITY_DN73781_c1_g1	1.57841	50.2103	-4.99144	6.8442e-16	2.0077e-12		-4.99144
TRINITY_DN74423_c1_g2	335.194	1241.6	-1.88913	1.081e-15	3.0362e-12		-1.88913
TRINITY_DN77319_c0_g2	26.2485	200.143	-2.93072	1.2312e-15	3.3859e-12		-2.93072
TRINITY_DN53733_c0_g1	137.129	13362.5	-6.60652	1.3506e-15	3.6385e-12		-6.60652
TRINITY_DN83035_c0_g1	5.47106	71.0953	-3.69986	1.4435e-15	3.8111e-12		-3.69986
TRINITY_DN78856_c0_g1	1.38171	2979.84	-11.0746	4.3553e-15	1.1047e-11		-11.0746
TRINITY_DN79588_c1_g1	145.335	749.133	-2.36584	4.4355e-15	1.1047e-11		-2.36584
TRINITY_DN62456_c0_g3	4.13947	475.093	-6.84262	4.8005e-15	1.1735e-11		-6.84262
TRINITY_DN77427_c0_g1	1010.01	57850.7	-5.8399	5.5218e-15	1.3253e-11		-5.8399
TRINITY_DN58143_c0_g1	1757.67	6278.97	-1.83686	8.9257e-15	2.0671e-11		-1.83686
TRINITY_DN67956_c7_g6	4882.19	14906.7	-1.61036	1.0119e-14	2.303e-11		-1.61036
TRINITY_DN86520_c2_g4	756.08	2294.41	-1.60151	1.6937e-14	3.7894e-11		-1.60151
TRINITY_DN85006_c2_g6	8.86998	77.8335	-3.13339	2.6926e-14	5.924e-11		-3.13339
TRINITY_DN87354_c2_g1	0.476084	440.823	-9.85477	8.7293e-14	1.8891e-10		-9.85477
TRINITY_DN87145_c4_g1	207.792	670.302	-1.68967	8.895e-14	1.8939e-10		-1.68967
TRINITY_DN70330_c0_g1	295.632	920.047	-1.63791	1.4549e-13	3.001e-10		-1.63791
TRINITY_DN77427_c0_g3	88.5074	5570.13	-5.97577	1.6386e-13	3.2773e-10		-5.97577
TRINITY_DN83163_c0_g1	996.212	2871.86	-1.52746	1.6314e-13	3.2773e-10		-1.52746
TRINITY_DN63879_c0_g1	329.139	1014.88	-1.62454	1.7019e-13	3.3531e-10		-1.62454
TRINITY_DN80168_c3_g4	923.877	2679	-1.53592	2.2116e-13	4.112e-10		-1.53592
TRINITY_DN82705_c1_g2	455.913	1439.06	-1.6583	2.6688e-13	4.8931e-10		-1.6583
TRINITY_DN75999_c1_g1	635.076	4915.84	-2.95244	5.5404e-13	9.8834e-10		-2.95244
TRINITY_DN63818_c0_g1	6.58782	74.4038	-3.4975	6.5339e-13	1.1337e-09		-3.4975
TRINITY_DN77735_c3_g4	8284.64	22474.7	-1.43979	6.6132e-13	1.1337e-09		-1.43979
TRINITY_DN85129_c5_g1	71.1219	359.516	-2.33769	6.9044e-13	1.1644e-09		-2.33769
TRINITY_DN80838_c0_g3	2927.12	8106.27	-1.46955	8.5761e-13	1.3977e-09		-1.46955
TRINITY_DN68371_c1_g2	724.34	2057.2	-1.50594	1.1154e-12	1.7956e-09		-1.50594
TRINITY_DN64048_c0_g1	847.692	2399.05	-1.50085	1.2635e-12	2.0096e-09		-1.50085
TRINITY_DN65559_c1_g2	15.1921	214.968	-3.82272	1.6624e-12	2.5818e-09		-3.82272
TRINITY_DN74737_c2_g1	797.149	2227.79	-1.48269	1.7902e-12	2.6918e-09		-1.48269
TRINITY_DN83163_c0_g5	249.657	794.005	-1.6692	1.7945e-12	2.6918e-09		-1.6692
TRINITY_DN59616_c0_g1	316.058	921.375	-1.5436	2.4286e-12	3.5621e-09		-1.5436
TRINITY_DN81539_c9_g1	35.2123	156.241	-2.14962	2.617e-12	3.7962e-09		-2.14962
TRINITY_DN74196_c2_g2	80.6503	281.409	-1.80292	3.4208e-12	4.9083e-09		-1.80292
TRINITY_DN68412_c4_g5	991.993	4592.16	-2.21077	4.5627e-12	6.4076e-09		-2.21077
TRINITY_DN76295_c1_g1	2151.53	5806.02	-1.43219	4.6165e-12	6.4148e-09		-1.43219
TRINITY_DN83651_c5_g4	8322.99	21845.5	-1.39216	5.2004e-12	7.1509e-09		-1.39216
TRINITY_DN62420_c0_g1	17.5273	184.635	-3.397	7.6654e-12	1.0221e-08		-3.397
TRINITY_DN66337_c2_g4	1048.52	2817.9	-1.42627	8.2687e-12	1.0915e-08		-1.42627
TRINITY_DN59676_c0_g1	358.137	1012.3	-1.49905	9.0961e-12	1.1889e-08		-1.49905
TRINITY_DN79802_c2_g1	692.808	1840.26	-1.40938	9.8415e-12	1.2737e-08		-1.40938
TRINITY_DN84980_c0_g1	646.133	1739.38	-1.42867	1.4645e-11	1.8589e-08		-1.42867
TRINITY_DN86925_c3_g1	59.5922	373.212	-2.6468	1.6768e-11	2.0882e-08		-2.6468
TRINITY_DN73151_c3_g4	694.476	6591.96	-3.24671	1.7503e-11	2.1453e-08		-3.24671
TRINITY_DN73826_c1_g1	10.1432	75.579	-2.89747	1.7552e-11	2.1453e-08		-2.89747
TRINITY_DN72633_c4_g1	109.406	347.957	-1.66922	2.1259e-11	2.5746e-08		-1.66922
TRINITY_DN83429_c5_g1	12.3261	123.474	-3.32441	2.3602e-11	2.8324e-08		-3.32441
TRINITY_DN61409_c0_g1	384.665	1054.85	-1.45536	2.4084e-11	2.8642e-08		-1.45536
TRINITY_DN67063_c2_g3	751.721	1972.12	-1.39148	2.6353e-11	3.1061e-08		-1.39148
TRINITY_DN81459_c1_g2	646.989	1840.19	-1.50804	2.8877e-11	3.3734e-08		-1.50804
TRINITY_DN83751_c1_g2	869.591	2299.46	-1.40289	3.2756e-11	3.793e-08		-1.40289
TRINITY_DN76354_c1_g5	554.822	1544.06	-1.47663	3.3502e-11	3.8456e-08		-1.47663
TRINITY_DN84256_c3_g2	366.051	1243.94	-1.7648	3.949e-11	4.4555e-08		-1.7648
TRINITY_DN83279_c1_g3	1094.82	2821.77	-1.3659	4.5549e-11	5.0527e-08		-1.3659
TRINITY_DN73987_c4_g3	253.767	816.119	-1.68527	5.1789e-11	5.6971e-08		-1.68527
TRINITY_DN77912_c0_g1	60.4207	613.185	-3.34321	5.2555e-11	5.7335e-08		-3.34321
TRINITY_DN78874_c1_g1	716.056	1858.13	-1.3757	6.1659e-11	6.6717e-08		-1.3757
TRINITY_DN86210_c0_g1	5.77136	52.8558	-3.19508	7.3585e-11	7.8336e-08		-3.19508
TRINITY_DN60514_c0_g1	242.924	671.473	-1.46683	7.8465e-11	8.2863e-08		-1.46683
TRINITY_DN69856_c2_g1	1182.3	3018.9	-1.35243	1.002e-10	1.0415e-07		-1.35243
TRINITY_DN66623_c0_g1	26.4656	186.736	-2.81881	1.0772e-10	1.1109e-07		-2.81881
TRINITY_DN69098_c0_g1	668.247	1984.62	-1.57041	1.1779e-10	1.2002e-07		-1.57041
TRINITY_DN69526_c0_g2	3.59154	44.5728	-3.63349	1.1819e-10	1.2002e-07		-3.63349
TRINITY_DN62318_c0_g2	11.5551	940.922	-6.34747	1.2338e-10	1.2339e-07		-6.34747
TRINITY_DN68494_c0_g2	314.728	834.171	-1.40624	1.3122e-10	1.3024e-07		-1.40624
TRINITY_DN83168_c0_g1	7.97473	137.443	-4.10725	1.3846e-10	1.364e-07		-4.10725
TRINITY_DN86520_c2_g3	2167.46	5355.65	-1.30506	1.4352e-10	1.4033e-07		-1.30506
TRINITY_DN81026_c0_g1	1571.43	3922.59	-1.31973	1.6148e-10	1.5674e-07		-1.31973
TRINITY_DN63881_c0_g1	1013.6	2545.03	-1.3282	1.7513e-10	1.6875e-07		-1.3282
TRINITY_DN66375_c1_g1	1157.77	2903.26	-1.32633	1.7772e-10	1.7e-07		-1.32633
TRINITY_DN79430_c0_g10	1208.84	3016.13	-1.31907	1.8102e-10	1.7075e-07		-1.31907
TRINITY_DN71127_c1_g1	0.781579	418.47	-9.06451	1.9099e-10	1.788e-07		-9.06451
TRINITY_DN81581_c1_g1	65.7448	219.57	-1.73973	2.1889e-10	2.0349e-07		-1.73973
TRINITY_DN75999_c1_g2	19.1967	141.881	-2.88575	2.4377e-10	2.2347e-07		-2.88575
TRINITY_DN83864_c1_g1	5458.83	13310.9	-1.28595	2.5317e-10	2.3048e-07		-1.28595
TRINITY_DN84550_c2_g1	56.5335	191.781	-1.76228	3.292e-10	2.9765e-07		-1.76228
TRINITY_DN73595_c1_g2	3.97407	44.4906	-3.48481	4.0017e-10	3.5935e-07		-3.48481
TRINITY_DN71229_c4_g1	29.5676	1233.93	-5.38311	5.1799e-10	4.6202e-07		-5.38311
TRINITY_DN81263_c1_g1	1078.49	2624.05	-1.28278	5.6746e-10	5.0274e-07		-1.28278
TRINITY_DN67959_c2_g3	0.543537	1146.27	-11.0423	6.2621e-10	5.5105e-07		-11.0423
TRINITY_DN63915_c0_g1	289.386	806.16	-1.47807	7.2273e-10	6.2767e-07		-1.47807
TRINITY_DN80846_c1_g1	391.416	993.356	-1.34361	9.0764e-10	7.73e-07		-1.34361
TRINITY_DN62318_c0_g1	13.3703	1275.23	-6.57559	9.4037e-10	7.9574e-07		-6.57559
TRINITY_DN77715_c8_g3	387.247	969.715	-1.32431	9.6871e-10	8.145e-07		-1.32431
TRINITY_DN69485_c3_g1	6.67571	314.549	-5.55822	1.0117e-09	8.4527e-07		-5.55822
TRINITY_DN86701_c1_g1	74.5664	934.381	-3.64741	1.0537e-09	8.7483e-07		-3.64741
TRINITY_DN72955_c5_g2	1101.74	3062.53	-1.47494	1.1257e-09	9.2297e-07		-1.47494
TRINITY_DN63340_c0_g1	2.25685	39.6293	-4.13419	1.2128e-09	9.8829e-07		-4.13419
TRINITY_DN49916_c0_g1	1555.84	3704.53	-1.2516	1.267e-09	1.0198e-06		-1.2516
TRINITY_DN81126_c6_g1	805.796	1952.8	-1.27706	1.2754e-09	1.0203e-06		-1.27706
TRINITY_DN64171_c0_g1	610.921	1482.99	-1.27946	1.3497e-09	1.0715e-06		-1.27946
TRINITY_DN64216_c0_g1	345.384	869.794	-1.33247	1.3555e-09	1.0715e-06		-1.33247
TRINITY_DN83095_c1_g6	620.801	1496.25	-1.26915	1.4893e-09	1.1633e-06		-1.26915
TRINITY_DN86901_c6_g3	1136.57	2707.96	-1.25251	1.5008e-09	1.1654e-06		-1.25251
TRINITY_DN74332_c0_g1	366.758	927.561	-1.33861	1.5823e-09	1.2116e-06		-1.33861
TRINITY_DN71513_c5_g8	31126.6	71869.8	-1.20724	1.6061e-09	1.2185e-06		-1.20724
TRINITY_DN79525_c1_g1	125.532	354.113	-1.49616	1.6752e-09	1.2637e-06		-1.49616
TRINITY_DN69241_c0_g1	155.44	446.27	-1.52156	1.7252e-09	1.294e-06		-1.52156
TRINITY_DN79700_c3_g2	6582.01	15431.3	-1.22926	1.8538e-09	1.3748e-06		-1.22926
TRINITY_DN86939_c3_g1	3559.31	8344.79	-1.22928	1.8936e-09	1.3965e-06		-1.22928
TRINITY_DN58398_c0_g1	345.962	859.256	-1.31248	2.2144e-09	1.615e-06		-1.31248
TRINITY_DN79608_c2_g7	1291.78	3044.83	-1.23701	2.2098e-09	1.615e-06		-1.23701
TRINITY_DN77338_c8_g1	796.95	1895.06	-1.24968	2.4196e-09	1.7454e-06		-1.24968
TRINITY_DN84764_c1_g1	943.398	2238.81	-1.24679	2.4379e-09	1.749e-06		-1.24679
TRINITY_DN75147_c2_g1	3.06892	68.2048	-4.47407	2.4733e-09	1.7648e-06		-4.47407
TRINITY_DN69063_c2_g1	649.777	1980.67	-1.60797	2.6109e-09	1.853e-06		-1.60797
TRINITY_DN80824_c4_g1	1112.46	2636.39	-1.24481	2.7e-09	1.906e-06		-1.24481
TRINITY_DN74741_c1_g1	225.221	587.259	-1.38266	2.7817e-09	1.9532e-06		-1.38266
TRINITY_DN83016_c2_g1	1189.95	2791.99	-1.2304	3.1145e-09	2.1753e-06		-1.2304
TRINITY_DN77218_c1_g1	2746.86	11155.6	-2.02192	3.1389e-09	2.1808e-06		-2.02192
TRINITY_DN54437_c0_g1	2530.04	5844.94	-1.20803	3.278e-09	2.2597e-06		-1.20803
TRINITY_DN72107_c1_g2	497.164	1277.87	-1.36195	3.2866e-09	2.2597e-06		-1.36195
TRINITY_DN77033_c3_g2	1973.96	4567.56	-1.21033	3.4771e-09	2.3782e-06		-1.21033
TRINITY_DN61389_c0_g1	997.613	2360.77	-1.24271	3.5057e-09	2.3854e-06		-1.24271
TRINITY_DN64108_c0_g1	369.367	899.519	-1.2841	3.5466e-09	2.3955e-06		-1.2841
TRINITY_DN66659_c1_g2	976.344	2290.43	-1.23016	3.5567e-09	2.3955e-06		-1.23016
TRINITY_DN66625_c0_g1	1407.15	3285.56	-1.22336	3.6288e-09	2.4316e-06		-1.22336
TRINITY_DN65985_c0_g2	691.801	1645.59	-1.25017	3.7004e-09	2.4671e-06		-1.25017
TRINITY_DN79972_c2_g2	691.457	1782.89	-1.3665	3.7686e-09	2.4999e-06		-1.3665
TRINITY_DN67956_c7_g5	5244.03	19355.3	-1.88398	4.0932e-09	2.7016e-06		-1.88398
TRINITY_DN85013_c1_g5	124.024	337.939	-1.44614	4.1219e-09	2.7071e-06		-1.44614
TRINITY_DN63593_c0_g1	287.064	713.716	-1.31398	4.2345e-09	2.7673e-06		-1.31398
TRINITY_DN87536_c5_g1	154.111	404.099	-1.39074	4.9002e-09	3.1865e-06		-1.39074
TRINITY_DN69312_c1_g3	60.1304	1963.21	-5.02898	5.0757e-09	3.2844e-06		-5.02898
TRINITY_DN82917_c1_g2	4.32092	606.283	-7.13251	5.4107e-09	3.4842e-06		-7.13251
TRINITY_DN78413_c2_g3	2272.29	5242.44	-1.20609	5.6858e-09	3.6259e-06		-1.20609
TRINITY_DN85509_c2_g3	321.18	793.234	-1.30437	5.671e-09	3.6259e-06		-1.30437
TRINITY_DN80668_c0_g1	352.289	1033.66	-1.55294	5.7742e-09	3.6471e-06		-1.55294
TRINITY_DN68064_c3_g7	147.576	387.338	-1.39213	5.957e-09	3.734e-06		-1.39213
TRINITY_DN80538_c3_g2	260.746	649.53	-1.31675	5.9684e-09	3.734e-06		-1.31675
TRINITY_DN62067_c0_g1	0	18.5876	#NUM!	7.0799e-09	4.3673e-06		#NUM!
TRINITY_DN62948_c0_g1	686.508	1601.6	-1.22216	7.0664e-09	4.3673e-06		-1.22216
TRINITY_DN62170_c0_g1	469.518	1108.03	-1.23875	7.7634e-09	4.7445e-06		-1.23875
TRINITY_DN85440_c6_g1	904.073	3071.53	-1.76445	7.8775e-09	4.7921e-06		-1.76445
TRINITY_DN71182_c0_g2	1190.11	2726.22	-1.19581	8.2124e-09	4.9502e-06		-1.19581
TRINITY_DN79569_c5_g10	223.864	556.942	-1.31491	8.1845e-09	4.9502e-06		-1.31491
TRINITY_DN74178_c0_g1	1.38171	27.334	-4.30617	8.3673e-09	5.0015e-06		-4.30617
TRINITY_DN87263_c4_g1	4209.11	9547.52	-1.18161	8.3734e-09	5.0015e-06		-1.18161
TRINITY_DN71718_c0_g2	2339.02	5277.51	-1.17396	9.4625e-09	5.6267e-06		-1.17396
TRINITY_DN82144_c3_g1	426.944	1080.27	-1.33928	1.0033e-08	5.9393e-06		-1.33928
TRINITY_DN85848_c1_g1	5551.91	12449	-1.16497	1.0725e-08	6.3204e-06		-1.16497
TRINITY_DN85168_c1_g5	2220.8	4953.51	-1.15737	1.0796e-08	6.3338e-06		-1.15737
TRINITY_DN87003_c2_g2	98.9305	271.836	-1.45825	1.1185e-08	6.5335e-06		-1.45825
TRINITY_DN84360_c1_g3	1293.44	2943.36	-1.18625	1.1258e-08	6.5471e-06		-1.18625
TRINITY_DN72254_c0_g2	831.625	1918.94	-1.2063	1.136e-08	6.5482e-06		-1.2063
TRINITY_DN79135_c2_g1	1263.63	2877.06	-1.18702	1.1344e-08	6.5482e-06		-1.18702
TRINITY_DN79307_c7_g5	881.756	3254.39	-1.88394	1.1736e-08	6.6776e-06		-1.88394
TRINITY_DN73430_c1_g2	1707.62	3929.19	-1.20225	1.1917e-08	6.7228e-06		-1.20225
TRINITY_DN75387_c1_g3	736.587	1704.45	-1.21038	1.1886e-08	6.7228e-06		-1.21038
TRINITY_DN73186_c2_g3	1756.11	3968.83	-1.17633	1.2011e-08	6.7469e-06		-1.17633
TRINITY_DN65153_c0_g2	885.179	2022.46	-1.19207	1.2584e-08	7.039e-06		-1.19207
TRINITY_DN74497_c4_g1	3166.16	7075.71	-1.16014	1.2994e-08	7.2374e-06		-1.16014
TRINITY_DN72493_c1_g9	380.233	974.074	-1.35715	1.3261e-08	7.294e-06		-1.35715
TRINITY_DN64136_c0_g1	1784.95	5217.34	-1.54743	1.3878e-08	7.6017e-06		-1.54743
TRINITY_DN77041_c1_g2	114.182	297.227	-1.38023	1.4619e-08	7.9743e-06		-1.38023
TRINITY_DN70560_c4_g4	61.9431	184.684	-1.57605	1.5145e-08	8.1602e-06		-1.57605
TRINITY_DN81911_c1_g4	1892.28	4230.48	-1.1607	1.511e-08	8.1602e-06		-1.1607
TRINITY_DN72187_c2_g1	726.659	1660.12	-1.19194	1.6825e-08	8.9921e-06		-1.19194
TRINITY_DN84505_c1_g2	129.254	478.948	-1.88966	1.6985e-08	9.0408e-06		-1.88966
TRINITY_DN86663_c3_g2	497.954	1149.4	-1.20679	1.7338e-08	9.1916e-06		-1.20679
TRINITY_DN63380_c0_g1	2.40133	31.235	-3.70125	1.8067e-08	9.477e-06		-3.70125
TRINITY_DN64394_c0_g1	6305.89	14802.9	-1.2311	1.8032e-08	9.477e-06		-1.2311
TRINITY_DN72814_c3_g1	18.2019	139.076	-2.93371	1.8092e-08	9.477e-06		-2.93371
TRINITY_DN70132_c0_g2	804.667	1818.07	-1.17595	2.0396e-08	1.0436e-05		-1.17595
TRINITY_DN79993_c1_g1	1.60451	51.586	-5.00677	2.026e-08	1.0436e-05		-5.00677
TRINITY_DN87521_c9_g2	371.213	1220.96	-1.7177	2.028e-08	1.0436e-05		-1.7177
TRINITY_DN67949_c7_g1	551.914	1266.36	-1.19817	2.1003e-08	1.0664e-05		-1.19817
TRINITY_DN81894_c2_g7	741.958	1684.06	-1.18253	2.2163e-08	1.1209e-05		-1.18253
TRINITY_DN81500_c3_g1	667.425	1509.57	-1.17747	2.2893e-08	1.1534e-05		-1.17747
TRINITY_DN69973_c0_g2	11074	23988.4	-1.11516	2.3539e-08	1.1815e-05		-1.11516
TRINITY_DN78907_c2_g5	150.308	375.879	-1.32235	2.4211e-08	1.206e-05		-1.32235
TRINITY_DN66683_c0_g1	14.2369	586.273	-5.36386	2.4499e-08	1.2158e-05		-5.36386
TRINITY_DN79430_c0_g3	1019.34	2266.07	-1.15255	2.474e-08	1.2232e-05		-1.15255
TRINITY_DN84184_c0_g4	19.9574	83.2963	-2.06133	2.4956e-08	1.2292e-05		-2.06133
TRINITY_DN64235_c0_g2	1381.42	3067.28	-1.15081	2.6179e-08	1.2799e-05		-1.15081
TRINITY_DN64947_c0_g1	620.144	1402.07	-1.17688	2.6516e-08	1.2869e-05		-1.17688
TRINITY_DN86789_c1_g1	131.523	336.658	-1.35597	2.6469e-08	1.2869e-05		-1.35597
TRINITY_DN63759_c0_g1	52.4856	158.597	-1.59537	2.9086e-08	1.4013e-05		-1.59537
TRINITY_DN76391_c2_g1	1213.81	2689.86	-1.14799	3.0115e-08	1.4404e-05		-1.14799
TRINITY_DN73568_c2_g2	1318.79	3038.24	-1.20402	3.4184e-08	1.6174e-05		-1.20402
TRINITY_DN80749_c1_g2	95.8268	276.308	-1.52778	3.446e-08	1.6246e-05		-1.52778
TRINITY_DN83261_c0_g1	182.907	956.49	-2.38664	3.6862e-08	1.7317e-05		-2.38664
TRINITY_DN73148_c0_g2	620.512	1392.03	-1.16566	3.7397e-08	1.7388e-05		-1.16566
TRINITY_DN80231_c0_g1	674.792	1586.89	-1.23368	3.7409e-08	1.7388e-05		-1.23368
TRINITY_DN77526_c1_g1	17.8638	218.829	-3.61469	3.8739e-08	1.7943e-05		-3.61469
TRINITY_DN80717_c2_g5	118.6	306.345	-1.36905	3.9044e-08	1.8021e-05		-1.36905
TRINITY_DN65185_c3_g4	19734.9	42055.1	-1.09154	4.24e-08	1.9367e-05		-1.09154
TRINITY_DN67274_c1_g1	114.263	294.236	-1.36461	4.2829e-08	1.9495e-05		-1.36461
TRINITY_DN78389_c4_g1	0.279392	33.6468	-6.91204	4.379e-08	1.9864e-05		-6.91204
TRINITY_DN65645_c0_g1	1779.47	3901.16	-1.13245	4.3964e-08	1.9875e-05		-1.13245
TRINITY_DN62570_c0_g1	810.868	1809.16	-1.15778	4.5206e-08	2.0367e-05		-1.15778
TRINITY_DN77732_c1_g2	1182.47	3793.27	-1.68164	4.5365e-08	2.0369e-05		-1.68164
TRINITY_DN84505_c1_g1	188.735	774.405	-2.03673	4.736e-08	2.1193e-05		-2.03673
TRINITY_DN86254_c5_g1	1521.63	3316.1	-1.12387	4.7576e-08	2.1217e-05		-1.12387
TRINITY_DN85632_c2_g1	3343.21	7232.36	-1.11323	4.888e-08	2.1726e-05		-1.11323
TRINITY_DN79440_c2_g1	882.764	1952.69	-1.14536	4.931e-08	2.1843e-05		-1.14536
TRINITY_DN85679_c1_g2	715.893	1595.54	-1.15623	5.0127e-08	2.2057e-05		-1.15623
TRINITY_DN63227_c0_g1	2786.54	6538.58	-1.2305	5.0601e-08	2.2115e-05		-1.2305
TRINITY_DN84803_c2_g1	685.901	1524.46	-1.15222	5.0929e-08	2.2115e-05		-1.15222
TRINITY_DN66411_c0_g1	1416.64	3106.35	-1.13274	5.1201e-08	2.216e-05		-1.13274
TRINITY_DN71314_c5_g1	594.162	1335.7	-1.16867	5.1577e-08	2.2223e-05		-1.16867
TRINITY_DN79636_c4_g2	1230.54	2688.55	-1.12754	5.1682e-08	2.2223e-05		-1.12754
TRINITY_DN73910_c1_g1	1753.94	3815.43	-1.12125	5.2946e-08	2.2692e-05		-1.12125
TRINITY_DN86376_c3_g1	66.5554	184.572	-1.47156	5.4906e-08	2.3456e-05		-1.47156
TRINITY_DN86132_c1_g1	580.618	1290.18	-1.15191	5.5381e-08	2.3583e-05		-1.15191
TRINITY_DN65325_c0_g1	872.896	1925.5	-1.14135	5.6611e-08	2.3999e-05		-1.14135
TRINITY_DN68973_c3_g4	635.673	1398.5	-1.13752	5.7394e-08	2.4206e-05		-1.13752
TRINITY_DN67268_c0_g1	1012.71	2213.81	-1.12831	5.8392e-08	2.4548e-05		-1.12831
TRINITY_DN87375_c3_g1	1335.68	2889.33	-1.11316	5.8785e-08	2.4635e-05		-1.11316
TRINITY_DN84832_c1_g1	1515.68	3288.22	-1.11734	6.0747e-08	2.5377e-05		-1.11734
TRINITY_DN70251_c0_g1	58.3872	168.745	-1.53112	6.1532e-08	2.5543e-05		-1.53112
TRINITY_DN85014_c2_g1	1020.18	2239.65	-1.13445	6.1796e-08	2.5572e-05		-1.13445
TRINITY_DN82056_c1_g2	1310.29	4407.88	-1.7502	6.2443e-08	2.5759e-05		-1.7502
TRINITY_DN80526_c4_g2	1051.73	2293.89	-1.12503	6.3412e-08	2.6077e-05		-1.12503
TRINITY_DN71232_c1_g2	828.252	1819.72	-1.13558	6.5401e-08	2.6646e-05		-1.13558
TRINITY_DN78948_c0_g5	137.255	345.394	-1.33139	6.6097e-08	2.6847e-05		-1.33139
TRINITY_DN67956_c7_g2	4695.64	10169.3	-1.11482	6.7169e-08	2.7199e-05		-1.11482
TRINITY_DN83720_c4_g1	2296.84	4957.34	-1.10992	7.0027e-08	2.8269e-05		-1.10992
TRINITY_DN60744_c0_g1	0.584887	56.4814	-6.59347	7.1422e-08	2.8743e-05		-6.59347
TRINITY_DN79276_c1_g2	836.992	2149.65	-1.36082	7.1969e-08	2.8789e-05		-1.36082
TRINITY_DN62776_c1_g1	1381.2	2998.63	-1.11838	7.4857e-08	2.9764e-05		-1.11838
TRINITY_DN76249_c0_g4	1419.75	3165.06	-1.1566	7.5764e-08	3.0034e-05		-1.1566
TRINITY_DN76213_c0_g1	252.632	587.102	-1.21658	7.7593e-08	3.0667e-05		-1.21658
TRINITY_DN76042_c2_g1	860.104	1874.99	-1.1243	7.8678e-08	3.0911e-05		-1.1243
TRINITY_DN69485_c3_g4	7.89123	338.544	-5.42295	8.4793e-08	3.3214e-05		-5.42295
TRINITY_DN62723_c0_g1	403.174	1545.54	-1.93864	8.6161e-08	3.365e-05		-1.93864
TRINITY_DN78983_c0_g2	308.999	707.135	-1.19438	8.8644e-08	3.4518e-05		-1.19438
TRINITY_DN79284_c3_g5	680.576	1480.94	-1.12169	9.004e-08	3.4958e-05		-1.12169
TRINITY_DN73248_c3_g1	2125.91	5103.25	-1.26333	9.1268e-08	3.5331e-05		-1.26333
TRINITY_DN65583_c6_g2	1159.52	2776.2	-1.25958	9.8468e-08	3.7896e-05		-1.25958
TRINITY_DN75935_c4_g2	32.0439	223.879	-2.8046	1.0043e-07	3.854e-05		-2.8046
TRINITY_DN47981_c0_g1	447.205	988.905	-1.14489	1.0096e-07	3.863e-05		-1.14489
TRINITY_DN64721_c0_g2	6066.5	12850.3	-1.08287	1.0204e-07	3.8932e-05		-1.08287
TRINITY_DN80796_c3_g1	216.092	650.786	-1.59054	1.0371e-07	3.9342e-05		-1.59054
TRINITY_DN79560_c0_g1	1157.48	2506.27	-1.11455	1.042e-07	3.9413e-05		-1.11455
TRINITY_DN82784_c0_g3	501.607	1104.39	-1.13862	1.0463e-07	3.9462e-05		-1.13862
TRINITY_DN81751_c0_g1	68.9876	527.192	-2.93392	1.0504e-07	3.9505e-05		-2.93392
TRINITY_DN78798_c2_g1	1.40782	23.9693	-4.08966	1.0684e-07	3.9953e-05		-4.08966
TRINITY_DN70144_c2_g3	862.74	2032.24	-1.23607	1.0958e-07	4.0746e-05		-1.23607
TRINITY_DN68370_c4_g3	243.089	621.034	-1.35319	1.1157e-07	4.1255e-05		-1.35319
TRINITY_DN77121_c4_g3	1225.6	2625.34	-1.09902	1.1145e-07	4.1255e-05		-1.09902
TRINITY_DN77153_c2_g1	34.3349	154.793	-2.17259	1.1233e-07	4.1414e-05		-2.17259
TRINITY_DN74946_c0_g2	1995.94	4414.65	-1.14524	1.1388e-07	4.1643e-05		-1.14524
TRINITY_DN79892_c4_g3	432.894	961.31	-1.15099	1.1374e-07	4.1643e-05		-1.15099
TRINITY_DN74840_c1_g1	660.758	1497.73	-1.18058	1.1529e-07	4.2041e-05		-1.18058
TRINITY_DN73859_c0_g3	10.2851	181.075	-4.13797	1.1952e-07	4.3464e-05		-4.13797
TRINITY_DN77251_c4_g1	1.36647	133.472	-6.60994	1.2164e-07	4.4114e-05		-6.60994
TRINITY_DN55081_c0_g1	598.05	1297.78	-1.11771	1.2825e-07	4.6257e-05		-1.11771
TRINITY_DN80928_c1_g3	390.956	979.359	-1.32483	1.3577e-07	4.8836e-05		-1.32483
TRINITY_DN85977_c0_g2	2.16329	48.2926	-4.4805	1.4037e-07	5.0351e-05		-4.4805
TRINITY_DN77801_c1_g1	1284.54	2732.47	-1.08895	1.453e-07	5.1838e-05		-1.08895
TRINITY_DN84245_c0_g2	1930.88	4159.16	-1.10703	1.4715e-07	5.2359e-05		-1.10703
TRINITY_DN84703_c0_g6	2582.46	5441.09	-1.07515	1.5304e-07	5.4309e-05		-1.07515
TRINITY_DN76844_c2_g1	2333.13	4903.36	-1.0715	1.5447e-07	5.4668e-05		-1.0715
TRINITY_DN64033_c0_g2	1079.36	2302.17	-1.09282	1.5652e-07	5.5245e-05		-1.09282
TRINITY_DN85824_c3_g1	2754.56	5770.29	-1.06682	1.5972e-07	5.6226e-05		-1.06682
TRINITY_DN84041_c7_g2	2306.7	4858.58	-1.07471	1.6134e-07	5.6642e-05		-1.07471
TRINITY_DN83261_c0_g4	136.499	733.292	-2.4255	1.6295e-07	5.7058e-05		-2.4255
TRINITY_DN72633_c4_g3	11.4422	56.699	-2.30896	1.6586e-07	5.7771e-05		-2.30896
TRINITY_DN76990_c0_g1	76.9353	5522.61	-6.16556	1.6576e-07	5.7771e-05		-6.16556
TRINITY_DN77070_c1_g2	1337.42	2839.16	-1.08601	1.6984e-07	5.8809e-05		-1.08601
TRINITY_DN78296_c0_g1	612.668	1423.88	-1.21664	1.7018e-07	5.8809e-05		-1.21664
TRINITY_DN81728_c0_g1	1335.09	2838.66	-1.08828	1.6937e-07	5.8809e-05		-1.08828
TRINITY_DN51975_c0_g1	1110.27	2361.71	-1.08892	1.714e-07	5.892e-05		-1.08892
TRINITY_DN76488_c0_g1	574.652	1243.66	-1.11383	1.7107e-07	5.892e-05		-1.11383
TRINITY_DN71524_c2_g1	101.106	252.132	-1.31831	1.7201e-07	5.8979e-05		-1.31831
TRINITY_DN87037_c0_g1	1364.97	2889.34	-1.08187	1.7519e-07	5.9914e-05		-1.08187
TRINITY_DN76127_c1_g1	30.6155	128.108	-2.06503	1.7759e-07	6.0111e-05		-2.06503
TRINITY_DN73859_c0_g4	1896.2	3933.03	-1.05253	1.7889e-07	6.0242e-05		-1.05253
TRINITY_DN79736_c2_g1	5.67781	39.021	-2.78084	1.7882e-07	6.0242e-05		-2.78084
TRINITY_DN63540_c0_g1	1052.16	2227.31	-1.08194	1.9243e-07	6.4358e-05		-1.08194
TRINITY_DN84765_c0_g2	704.669	1508.89	-1.09847	1.9258e-07	6.4358e-05		-1.09847
TRINITY_DN83162_c0_g2	677.325	1449.61	-1.09774	1.9483e-07	6.4946e-05		-1.09774
TRINITY_DN63289_c0_g1	101.144	259.053	-1.35684	1.9549e-07	6.5002e-05		-1.35684
TRINITY_DN71693_c1_g1	1063.89	2256.74	-1.0849	1.9937e-07	6.5959e-05		-1.0849
TRINITY_DN74126_c2_g1	3648.88	7679.25	-1.07351	2.0022e-07	6.6077e-05		-1.07351
TRINITY_DN69537_c2_g1	1913.98	3998	-1.06271	2.0967e-07	6.868e-05		-1.06271
TRINITY_DN67924_c1_g2	1374.62	3158.42	-1.20017	2.1168e-07	6.9166e-05		-1.20017
TRINITY_DN76795_c2_g1	911.198	1931.34	-1.08377	2.1295e-07	6.941e-05		-1.08377
TRINITY_DN79795_c0_g1	221.516	2569.15	-3.53581	2.1356e-07	6.9437e-05		-3.53581
TRINITY_DN78708_c0_g3	115.534	443.361	-1.94016	2.1548e-07	6.9891e-05		-1.94016
TRINITY_DN82176_c0_g2	381.821	828.766	-1.11807	2.188e-07	7.0791e-05		-1.11807
TRINITY_DN81593_c4_g2	855.494	1939.44	-1.18081	2.2142e-07	7.1465e-05		-1.18081
TRINITY_DN62503_c0_g1	391.785	889.288	-1.18259	2.2271e-07	7.1547e-05		-1.18259
TRINITY_DN72151_c3_g1	108.114	268.976	-1.31493	2.2276e-07	7.1547e-05		-1.31493
TRINITY_DN79892_c4_g1	3336.33	6934.02	-1.05543	2.3147e-07	7.4165e-05		-1.05543
TRINITY_DN73100_c5_g2	5.78453	480.237	-6.3754	2.3253e-07	7.4325e-05		-6.3754
TRINITY_DN77987_c3_g3	161.631	399.062	-1.30391	2.3592e-07	7.5226e-05		-1.30391
TRINITY_DN75392_c0_g2	1037.71	2197.37	-1.08237	2.3911e-07	7.6059e-05		-1.08237
TRINITY_DN84035_c2_g1	1947.36	4079.81	-1.06698	2.3982e-07	7.6083e-05		-1.06698
TRINITY_DN87097_c2_g2	1428.16	2984.04	-1.06311	2.4115e-07	7.6157e-05		-1.06311
TRINITY_DN84044_c1_g4	748.613	1590.82	-1.08748	2.4292e-07	7.6533e-05		-1.08748
TRINITY_DN74223_c1_g2	627.167	1342.86	-1.09838	2.4627e-07	7.7403e-05		-1.09838
TRINITY_DN75419_c0_g3	26.1833	377.41	-3.84942	2.4757e-07	7.7626e-05		-3.84942
TRINITY_DN68151_c2_g1	659.722	1413.58	-1.09942	2.5036e-07	7.7946e-05		-1.09942
TRINITY_DN78174_c0_g1	1387.3	2975.18	-1.1007	2.4943e-07	7.7946e-05		-1.1007
TRINITY_DN85501_c2_g6	965.759	2025.09	-1.06825	2.5012e-07	7.7946e-05		-1.06825
TRINITY_DN72946_c1_g1	693.868	1477.62	-1.09054	2.561e-07	7.936e-05		-1.09054
TRINITY_DN78227_c0_g2	34.7853	110.216	-1.66378	2.5945e-07	8.0209e-05		-1.66378
TRINITY_DN66659_c2_g1	847.151	1786.66	-1.07657	2.6731e-07	8.2445e-05		-1.07657
TRINITY_DN72812_c1_g1	1897.8	6554.39	-1.78813	2.6873e-07	8.269e-05		-1.78813
TRINITY_DN72937_c1_g1	15.9293	152.061	-3.25489	2.7405e-07	8.413e-05		-3.25489
TRINITY_DN65343_c8_g1	16.2924	65.5288	-2.00793	2.7506e-07	8.4246e-05		-2.00793
TRINITY_DN74633_c0_g2	2035.98	4219.34	-1.05129	2.8297e-07	8.6101e-05		-1.05129
TRINITY_DN82974_c1_g1	132.759	366.869	-1.46646	2.8328e-07	8.6101e-05		-1.46646
TRINITY_DN65687_c5_g4	2993.14	6190.74	-1.04845	2.907e-07	8.7854e-05		-1.04845
TRINITY_DN69425_c0_g1	681.529	1447.28	-1.08649	2.9084e-07	8.7854e-05		-1.08649
TRINITY_DN76605_c3_g1	87.7643	223.407	-1.34797	2.9386e-07	8.8364e-05		-1.34797
TRINITY_DN71241_c1_g5	184.367	543.316	-1.55921	2.9836e-07	8.9107e-05		-1.55921
TRINITY_DN76304_c1_g2	345.409	750.978	-1.12047	3.0596e-07	9.076e-05		-1.12047
TRINITY_DN70757_c7_g1	398.551	857.204	-1.10487	3.1694e-07	9.3809e-05		-1.10487
TRINITY_DN72871_c5_g2	1267.68	2644.32	-1.06071	3.2299e-07	9.5385e-05		-1.06071
TRINITY_DN76422_c10_g2	921.683	1924.4	-1.06206	3.2991e-07	9.7212e-05		-1.06206
TRINITY_DN63876_c0_g1	1356.25	2814.95	-1.05348	3.433e-07	0.00010093		-1.05348
TRINITY_DN85487_c0_g2	117.322	281.756	-1.26398	3.4953e-07	0.00010231		-1.26398
TRINITY_DN75992_c2_g1	1785.43	3674.25	-1.04118	3.7146e-07	0.00010825		-1.04118
TRINITY_DN76248_c4_g1	2197.04	4490.56	-1.03133	3.7441e-07	0.00010863		-1.03133
TRINITY_DN85895_c0_g4	269.342	619.132	-1.2008	3.7907e-07	0.00010974		-1.2008
TRINITY_DN64355_c0_g1	1026.16	2140.16	-1.06046	3.8189e-07	0.00011026		-1.06046
TRINITY_DN74016_c1_g1	1086.24	2257.71	-1.05551	3.8335e-07	0.00011026		-1.05551
TRINITY_DN78891_c3_g1	9.71286	80.3331	-3.04803	3.8339e-07	0.00011026		-3.04803
TRINITY_DN62759_c0_g1	150.944	400.064	-1.40621	3.8989e-07	0.00011142		-1.40621
TRINITY_DN84660_c1_g1	1662.85	3435.75	-1.04697	3.8994e-07	0.00011142		-1.04697
TRINITY_DN69558_c7_g4	1721.75	3548.17	-1.0432	3.9333e-07	0.00011166		-1.0432
TRINITY_DN85979_c1_g2	141.561	332.515	-1.23199	3.9195e-07	0.00011166		-1.23199
TRINITY_DN67327_c5_g1	1096.84	2286.87	-1.06002	3.9443e-07	0.00011173		-1.06002
TRINITY_DN65306_c0_g1	5829.33	11872	-1.02617	3.9788e-07	0.00011247		-1.02617
TRINITY_DN86773_c1_g2	1211.47	2509.12	-1.05043	4.0278e-07	0.00011361		-1.05043
TRINITY_DN85504_c2_g1	132.425	314.378	-1.24733	4.0466e-07	0.0001139		-1.24733
TRINITY_DN75901_c4_g4	2048.33	4510.87	-1.13896	4.0985e-07	0.00011479		-1.13896
TRINITY_DN79157_c1_g1	1177.44	2455.83	-1.06055	4.1044e-07	0.00011479		-1.06055
TRINITY_DN64315_c0_g1	1130.01	2343.8	-1.05252	4.1344e-07	0.00011499		-1.05252
TRINITY_DN67589_c0_g4	20922.6	42425.5	-1.01987	4.1219e-07	0.00011499		-1.01987
TRINITY_DN69951_c3_g1	1056.5	2197.53	-1.05659	4.145e-07	0.00011499		-1.05659
TRINITY_DN78728_c2_g1	425.51	915.242	-1.10496	4.1464e-07	0.00011499		-1.10496
TRINITY_DN78426_c2_g1	1818.02	3806.25	-1.066	4.1707e-07	0.00011542		-1.066
TRINITY_DN68447_c3_g3	25.8636	98.7969	-1.93354	4.2164e-07	0.00011644		-1.93354
TRINITY_DN72019_c3_g1	201.201	455.186	-1.17782	4.2335e-07	0.00011667		-1.17782
TRINITY_DN87379_c2_g1	14239.5	28904.1	-1.02138	4.4597e-07	0.00012241		-1.02138
TRINITY_DN73620_c1_g1	50.2057	141.308	-1.49292	4.5358e-07	0.00012422		-1.49292
TRINITY_DN81516_c3_g2	1957.87	4017.54	-1.03702	4.6524e-07	0.00012689		-1.03702
TRINITY_DN72831_c4_g1	955.384	1984.73	-1.05479	4.6718e-07	0.00012716		-1.05479
TRINITY_DN83615_c0_g1	0	40.0668	#NUM!	4.7005e-07	0.00012768		#NUM!
TRINITY_DN53874_c0_g1	804.572	1747.91	-1.11934	4.7289e-07	0.00012818		-1.11934
TRINITY_DN85087_c3_g1	6558.76	13364	-1.02686	4.7463e-07	0.00012839		-1.02686
TRINITY_DN82022_c0_g3	421.853	973.995	-1.20717	4.8387e-07	0.00013062		-1.20717
TRINITY_DN81248_c2_g1	4010.18	9020.03	-1.16946	4.8652e-07	0.0001308		-1.16946
TRINITY_DN79700_c3_g1	8631.2	17566.9	-1.02523	5.2329e-07	0.00013923		-1.02523
TRINITY_DN79905_c0_g1	1073.37	2227.01	-1.05297	5.2419e-07	0.00013923		-1.05297
TRINITY_DN82323_c2_g2	44.5178	128.913	-1.53395	5.2127e-07	0.00013923		-1.53395
TRINITY_DN82413_c0_g1	238.979	635.824	-1.41175	5.2415e-07	0.00013923		-1.41175
TRINITY_DN64458_c1_g1	1499.21	3085.89	-1.04148	5.2824e-07	0.00013974		-1.04148
TRINITY_DN63209_c0_g1	855.735	1773.95	-1.05173	5.3607e-07	0.00014153		-1.05173
TRINITY_DN67517_c4_g1	532.097	1128.27	-1.08435	5.3732e-07	0.00014158		-1.08435
TRINITY_DN80804_c2_g2	1449.98	2975.74	-1.03721	5.3968e-07	0.00014191		-1.03721
TRINITY_DN64057_c0_g1	988.828	2037.82	-1.04323	5.4454e-07	0.0001429		-1.04323
TRINITY_DN79061_c3_g1	1196.13	2457.45	-1.03879	5.456e-07	0.0001429		-1.03879
TRINITY_DN49226_c0_g1	915.21	2289.73	-1.323	5.5686e-07	0.00014499		-1.323
TRINITY_DN80869_c2_g1	2201.64	4488.74	-1.02773	5.5688e-07	0.00014499		-1.02773
TRINITY_DN85912_c1_g1	659.63	1386.09	-1.07129	5.6187e-07	0.00014601		-1.07129
TRINITY_DN72732_c1_g1	59.119	227.754	-1.94578	5.6787e-07	0.00014727		-1.94578
TRINITY_DN85980_c0_g2	54.356	145.901	-1.42448	5.8412e-07	0.00015119		-1.42448
TRINITY_DN81246_c0_g1	2039.27	4772.07	-1.22656	5.9079e-07	0.00015262		-1.22656
TRINITY_DN82884_c0_g1	2038.96	4142.05	-1.02252	5.9727e-07	0.00015399		-1.02252
TRINITY_DN82443_c3_g1	1075.54	2506.61	-1.22068	6.0459e-07	0.00015558		-1.22068
TRINITY_DN79425_c0_g1	339.685	799.35	-1.23463	6.1022e-07	0.00015672		-1.23463
TRINITY_DN83600_c1_g5	532.941	1122.97	-1.07527	6.1615e-07	0.0001579		-1.07527
TRINITY_DN87263_c4_g3	770.445	2681.06	-1.79904	6.1722e-07	0.0001579		-1.79904
TRINITY_DN72881_c2_g1	291.84	648.006	-1.15083	6.3028e-07	0.00016083		-1.15083
TRINITY_DN85596_c2_g1	1483.04	3015.33	-1.02376	6.3108e-07	0.00016083		-1.02376
TRINITY_DN80371_c4_g3	381.865	816.901	-1.0971	6.3244e-07	0.00016086		-1.0971
TRINITY_DN73276_c0_g4	601.336	1260.69	-1.06797	6.4617e-07	0.00016372		-1.06797
TRINITY_DN78915_c2_g2	1918.03	4242.86	-1.14541	6.6705e-07	0.00016772		-1.14541
TRINITY_DN81677_c3_g1	12.5916	55.8561	-2.14926	6.6687e-07	0.00016772		-2.14926
TRINITY_DN85734_c1_g1	135.404	1239.92	-3.1949	6.6519e-07	0.00016772		-3.1949
TRINITY_DN63952_c0_g1	9.46652	46.3698	-2.29228	6.724e-07	0.00016875		-2.29228
TRINITY_DN78506_c1_g1	603.489	1255.51	-1.05687	6.7925e-07	0.0001695		-1.05687
TRINITY_DN86048_c3_g1	828.582	1716.03	-1.05036	6.8514e-07	0.00017065		-1.05036
TRINITY_DN68804_c0_g1	636.226	1317.07	-1.04972	6.9204e-07	0.00017117		-1.04972
TRINITY_DN76024_c0_g2	215.026	473.01	-1.13736	6.9141e-07	0.00017117		-1.13736
TRINITY_DN83648_c0_g2	1318.51	2678.98	-1.02277	6.9243e-07	0.00017117		-1.02277
TRINITY_DN64296_c0_g1	670.632	1381.47	-1.04261	6.9478e-07	0.00017143		-1.04261
TRINITY_DN77781_c0_g5	201.306	446.093	-1.14796	6.9935e-07	0.00017224		-1.14796
TRINITY_DN73940_c2_g2	1119.69	2286.2	-1.02985	7.1999e-07	0.0001757		-1.02985
TRINITY_DN80542_c2_g1	290.683	631.121	-1.11847	7.2007e-07	0.0001757		-1.11847
TRINITY_DN86718_c4_g1	1009.47	2064.76	-1.03238	7.1913e-07	0.0001757		-1.03238
TRINITY_DN87130_c1_g1	1786.51	3637.36	-1.02575	7.171e-07	0.0001757		-1.02575
TRINITY_DN85319_c1_g3	1756.8	3577.55	-1.02602	7.2531e-07	0.00017665		-1.02602
TRINITY_DN70519_c4_g4	1280.59	2581.24	-1.01125	7.4641e-07	0.00018146		-1.01125
TRINITY_DN79240_c1_g1	1794.56	3861.88	-1.10568	7.5313e-07	0.00018275		-1.10568
TRINITY_DN79249_c10_g1	4421.65	8813.66	-0.995156	7.5475e-07	0.00018281		-0.995156
TRINITY_DN75224_c2_g1	773.202	1714.7	-1.14904	7.6061e-07	0.00018356		-1.14904
TRINITY_DN64162_c0_g1	41.4111	117.494	-1.5045	7.7246e-07	0.00018608		-1.5045
TRINITY_DN76425_c3_g3	8242.87	16466.6	-0.998323	7.7973e-07	0.00018749		-0.998323
TRINITY_DN81894_c2_g5	852.344	1742.78	-1.03188	7.9143e-07	0.00018995		-1.03188
TRINITY_DN81655_c0_g2	2689.7	5403.08	-1.00634	8.0432e-07	0.0001927		-1.00634
TRINITY_DN72586_c0_g2	1206.57	2523.93	-1.06476	8.2217e-07	0.00019662		-1.06476
TRINITY_DN77791_c1_g4	558.173	1384.08	-1.31014	8.2406e-07	0.00019671		-1.31014
TRINITY_DN85240_c0_g1	25.3832	84.8491	-1.74103	8.2767e-07	0.00019722		-1.74103
TRINITY_DN75164_c3_g3	115.042	269.91	-1.23032	8.2987e-07	0.00019739		-1.23032
TRINITY_DN70926_c1_g1	3563.73	7134.94	-1.00151	8.3981e-07	0.00019939		-1.00151
TRINITY_DN78546_c2_g2	3946.71	7933.45	-1.0073	8.4703e-07	0.00020074		-1.0073
TRINITY_DN65852_c0_g2	3.05368	27.6602	-3.17919	8.9493e-07	0.00021172		-3.17919
TRINITY_DN74076_c2_g1	58.5555	739.716	-3.65909	9.0351e-07	0.00021336		-3.65909
TRINITY_DN77781_c0_g2	1119.1	2774.66	-1.30997	9.144e-07	0.00021555		-1.30997
TRINITY_DN43779_c0_g1	0	1174.99	#NUM!	9.2224e-07	0.00021701		#NUM!
TRINITY_DN75911_c9_g1	1204.8	2429.59	-1.01192	9.2798e-07	0.00021779		-1.01192
TRINITY_DN77354_c4_g2	514.586	1073.03	-1.06021	9.2884e-07	0.00021779		-1.06021
TRINITY_DN71874_c0_g2	2041.49	4106.25	-1.0082	9.4507e-07	0.00022081		-1.0082
TRINITY_DN63982_c0_g1	21.4532	73.5238	-1.77702	9.4993e-07	0.00022155		-1.77702
TRINITY_DN75030_c1_g1	245.835	531.224	-1.11163	9.5705e-07	0.00022282		-1.11163
TRINITY_DN76579_c2_g2	310.416	692.921	-1.15849	9.6279e-07	0.00022376		-1.15849
TRINITY_DN69755_c1_g1	29.9627	384.377	-3.68128	9.7742e-07	0.00022636		-3.68128
TRINITY_DN79516_c0_g1	854.178	1736.29	-1.0234	9.7575e-07	0.00022636		-1.0234
TRINITY_DN86397_c1_g2	514.167	1059.32	-1.04283	9.8709e-07	0.0002282		-1.04283
TRINITY_DN83577_c2_g1	1927.4	3874.72	-1.00743	9.9739e-07	0.00023018		-1.00743
TRINITY_DN77735_c3_g2	3677.64	7199.77	-0.969172	1.0009e-06	0.00023052		-0.969172
TRINITY_DN80661_c1_g3	9.21762	45.1566	-2.29247	1.0024e-06	0.00023052		-2.29247
TRINITY_DN80909_c1_g1	1354.02	2718.72	-1.00568	1.0334e-06	0.00023601		-1.00568
TRINITY_DN68851_c3_g2	1128.07	2397.32	-1.08756	1.0453e-06	0.00023831		-1.08756
TRINITY_DN74024_c3_g1	3064.97	6108.21	-0.994877	1.0617e-06	0.00024165		-0.994877
TRINITY_DN78770_c0_g1	6.50512	38.05	-2.54825	1.0648e-06	0.00024194		-2.54825
TRINITY_DN84370_c1_g1	379.928	880.007	-1.21179	1.0694e-06	0.00024255		-1.21179
TRINITY_DN68286_c2_g2	559.491	1152.24	-1.04226	1.0785e-06	0.0002442		-1.04226
TRINITY_DN64840_c0_g1	108.639	259.289	-1.25502	1.0813e-06	0.00024443		-1.25502
TRINITY_DN76755_c1_g1	1903.37	4388.08	-1.20504	1.0925e-06	0.00024652		-1.20504
TRINITY_DN80245_c0_g1	8.8956	59.6369	-2.74504	1.0973e-06	0.00024719		-2.74504
TRINITY_DN80249_c4_g2	948.463	2217.19	-1.22507	1.1216e-06	0.00025138		-1.22507
TRINITY_DN85424_c5_g2	647.44	1332.23	-1.04103	1.1301e-06	0.00025241		-1.04103
TRINITY_DN80032_c4_g4	219.654	478.955	-1.12466	1.1382e-06	0.0002538		-1.12466
TRINITY_DN67451_c4_g2	0.916486	32.3926	-5.14341	1.1429e-06	0.00025442		-5.14341
TRINITY_DN73372_c3_g1	1527.44	3071.94	-1.00804	1.1687e-06	0.00025923		-1.00804
TRINITY_DN82912_c3_g2	939.159	1899.16	-1.01592	1.1704e-06	0.00025923		-1.01592
TRINITY_DN87734_c4_g1	944.88	1909.99	-1.01536	1.192e-06	0.00026357		-1.01536
TRINITY_DN75540_c0_g3	569.11	1163.36	-1.03152	1.2246e-06	0.00026988		-1.03152
TRINITY_DN67228_c0_g1	713.955	1590.33	-1.15542	1.2475e-06	0.00027447		-1.15542
TRINITY_DN79136_c4_g1	1495.29	2987.71	-0.998616	1.266e-06	0.00027808		-0.998616
TRINITY_DN64535_c1_g1	2700.32	5364.58	-0.990337	1.2682e-06	0.0002781		-0.990337
TRINITY_DN82533_c1_g3	1265.72	2548.99	-1.00997	1.281e-06	0.00028043		-1.00997
TRINITY_DN52623_c0_g1	2010.3	3999.56	-0.992428	1.2899e-06	0.00028098		-0.992428
TRINITY_DN74291_c2_g2	172.733	654.249	-1.9213	1.2934e-06	0.00028128		-1.9213
TRINITY_DN77936_c1_g1	1196.03	2599.25	-1.11984	1.3189e-06	0.00028543		-1.11984
TRINITY_DN84894_c2_g1	1518.26	3469.96	-1.1925	1.3176e-06	0.00028543		-1.1925
TRINITY_DN78306_c2_g1	2329.09	5042.82	-1.11446	1.3326e-06	0.00028744		-1.11446
TRINITY_DN84306_c0_g1	1939.69	3867.52	-0.995585	1.3408e-06	0.00028874		-0.995585
TRINITY_DN71125_c2_g1	2737.34	5432.04	-0.98872	1.3625e-06	0.00029198		-0.98872
TRINITY_DN72987_c5_g4	743.14	1504.86	-1.01792	1.3688e-06	0.00029286		-1.01792
TRINITY_DN71969_c2_g2	798.695	1618.91	-1.01931	1.3747e-06	0.00029364		-1.01931
TRINITY_DN74542_c2_g4	646.601	1398.03	-1.11244	1.3805e-06	0.00029441		-1.11244
TRINITY_DN83019_c1_g3	39.7651	114.594	-1.52696	1.4042e-06	0.00029897		-1.52696
TRINITY_DN83468_c3_g3	864.828	3415.67	-1.98168	1.4069e-06	0.00029907		-1.98168
TRINITY_DN85647_c1_g2	643.017	1307.9	-1.02432	1.4193e-06	0.00030122		-1.02432
TRINITY_DN66292_c0_g1	1140.85	2281.37	-0.999793	1.4629e-06	0.00030948		-0.999793
TRINITY_DN76925_c4_g1	732.39	1481.33	-1.01621	1.4711e-06	0.00031072		-1.01621
TRINITY_DN81254_c0_g2	1627.4	3227.75	-0.98796	1.4812e-06	0.00031184		-0.98796
TRINITY_DN85408_c4_g2	1364.15	2724.8	-0.998148	1.4796e-06	0.00031184		-0.998148
TRINITY_DN75974_c6_g1	54.3852	198.83	-1.87025	1.4987e-06	0.00031504		-1.87025
TRINITY_DN65721_c0_g1	396.111	823.036	-1.05505	1.503e-06	0.00031544		-1.05505
TRINITY_DN78034_c2_g1	8.99044	43.7075	-2.28142	1.5149e-06	0.00031741		-2.28142
TRINITY_DN71421_c9_g1	16.4821	94.3529	-2.51716	1.5215e-06	0.0003183		-2.51716
TRINITY_DN86513_c2_g1	75.2638	188.476	-1.32435	1.5307e-06	0.00031922		-1.32435
TRINITY_DN65098_c0_g1	818.93	1647.92	-1.00884	1.5829e-06	0.00032798		-1.00884
TRINITY_DN66903_c2_g1	2044.51	4203.77	-1.03992	1.5795e-06	0.00032798		-1.03992
TRINITY_DN69168_c1_g2	77.9984	195.328	-1.32438	1.5783e-06	0.00032798		-1.32438
TRINITY_DN76361_c3_g1	690.884	1396.36	-1.01516	1.5829e-06	0.00032798		-1.01516
TRINITY_DN82336_c1_g3	1129.37	2261.51	-1.00178	1.5851e-06	0.00032798		-1.00178
TRINITY_DN64868_c0_g1	2997.11	5893.1	-0.975452	1.6153e-06	0.0003329		-0.975452
TRINITY_DN74953_c5_g1	30.407	124.814	-2.0373	1.6165e-06	0.0003329		-2.0373
TRINITY_DN86497_c2_g1	1269.01	2530.48	-0.995702	1.6125e-06	0.0003329		-0.995702
TRINITY_DN62975_c0_g1	66.8826	176.939	-1.40355	1.6445e-06	0.00033709		-1.40355
TRINITY_DN74100_c1_g1	21.291	423.066	-4.31257	1.6441e-06	0.00033709		-4.31257
TRINITY_DN73144_c1_g2	3.14156	27.7447	-3.14266	1.6757e-06	0.00034296		-3.14266
TRINITY_DN63600_c0_g1	150.243	335.632	-1.15958	1.7265e-06	0.00035171		-1.15958
TRINITY_DN82221_c4_g4	846.44	1701.03	-1.00693	1.7263e-06	0.00035171		-1.00693
TRINITY_DN68639_c2_g2	1544.21	3359.71	-1.12147	1.7368e-06	0.00035326		-1.12147
TRINITY_DN77791_c1_g2	1235.16	2971.48	-1.26648	1.7587e-06	0.00035717		-1.26648
TRINITY_DN86791_c1_g3	1087.21	2176.98	-1.00169	1.7629e-06	0.00035748		-1.00169
TRINITY_DN84703_c0_g1	697.376	1681.39	-1.26964	1.7789e-06	0.00036016		-1.26964
TRINITY_DN78458_c3_g1	27.2032	88.2168	-1.69728	1.7917e-06	0.0003622		-1.69728
TRINITY_DN68071_c0_g1	850.041	1700.88	-1.00067	1.8924e-06	0.00037964		-1.00067
TRINITY_DN73293_c4_g1	495.435	1004.82	-1.02016	1.8912e-06	0.00037964		-1.02016
TRINITY_DN87776_c23_g4	136.736	307.533	-1.16935	1.8899e-06	0.00037964		-1.16935
TRINITY_DN77021_c0_g1	1329.45	2958.81	-1.15419	1.9151e-06	0.00038361		-1.15419
TRINITY_DN68275_c0_g1	56.266	362.832	-2.68897	1.9316e-06	0.00038633		-2.68897
TRINITY_DN78989_c1_g1	3316.85	6493.92	-0.969275	1.9637e-06	0.00039157		-0.969275
TRINITY_DN69985_c2_g3	583.667	1180.14	-1.01574	1.9864e-06	0.0003955		-1.01574
TRINITY_DN72050_c4_g1	1907.52	3773.23	-0.9841	2.0069e-06	0.00039898		-0.9841
TRINITY_DN84060_c1_g3	875.426	1798.38	-1.03864	2.032e-06	0.00040336		-1.03864
TRINITY_DN67973_c1_g1	1316.53	2608.49	-0.986477	2.0654e-06	0.00040876		-0.986477
TRINITY_DN69281_c0_g1	1441.22	2853.33	-0.985358	2.0793e-06	0.00041024		-0.985358
TRINITY_DN72416_c4_g1	2281.68	4466.71	-0.969118	2.0787e-06	0.00041024		-0.969118
TRINITY_DN78886_c1_g2	982.313	1955.43	-0.993235	2.0821e-06	0.00041024		-0.993235
TRINITY_DN77257_c0_g1	35.6021	105.085	-1.56153	2.0923e-06	0.00041162		-1.56153
TRINITY_DN66477_c2_g1	5.61993	35.5412	-2.66087	2.1002e-06	0.00041195		-2.66087
TRINITY_DN73415_c2_g3	565.265	1203.71	-1.09049	2.1002e-06	0.00041195		-1.09049
TRINITY_DN68193_c4_g1	1397.08	2844.55	-1.02578	2.1129e-06	0.00041383		-1.02578
TRINITY_DN72839_c2_g1	2337.51	4550.16	-0.960946	2.1809e-06	0.00042588		-0.960946
TRINITY_DN87614_c5_g2	2462.35	4817.76	-0.968329	2.1941e-06	0.00042783		-0.968329
TRINITY_DN76299_c1_g3	937.924	1866.89	-0.993094	2.2021e-06	0.00042876		-0.993094
TRINITY_DN81376_c1_g1	466.142	944.477	-1.01875	2.2294e-06	0.00043343		-1.01875
TRINITY_DN70559_c9_g3	567.269	1151.27	-1.02113	2.2391e-06	0.00043468		-1.02113
TRINITY_DN73936_c1_g1	229.822	485.415	-1.0787	2.2467e-06	0.00043551		-1.0787
TRINITY_DN69558_c7_g2	881.074	1762.19	-1.00003	2.2704e-06	0.00043945		-1.00003
TRINITY_DN78136_c3_g1	343.887	744.675	-1.11468	2.2743e-06	0.00043957		-1.11468
TRINITY_DN72118_c3_g1	282.695	591.037	-1.064	2.299e-06	0.0004428		-1.064
TRINITY_DN84408_c2_g1	1752.64	3420.44	-0.964653	2.3011e-06	0.0004428		-0.964653
TRINITY_DN78751_c0_g2	1801.18	3545.32	-0.976978	2.3151e-06	0.00044484		-0.976978
TRINITY_DN71974_c2_g1	1497.58	3089.88	-1.04492	2.3441e-06	0.00044976		-1.04492
TRINITY_DN68638_c0_g3	1.44917	20.2128	-3.80197	2.3556e-06	0.00045131		-3.80197
TRINITY_DN73307_c5_g1	69.2417	190.295	-1.45853	2.3856e-06	0.00045574		-1.45853
TRINITY_DN81667_c0_g2	154.634	341.688	-1.14383	2.3998e-06	0.00045779		-1.14383
TRINITY_DN79291_c1_g1	20.1977	70.7106	-1.80773	2.4198e-06	0.00046054		-1.80773
TRINITY_DN82399_c0_g1	1495.17	2928.79	-0.969994	2.4212e-06	0.00046054		-0.969994
TRINITY_DN67146_c2_g2	2721.27	5679.48	-1.06148	2.4304e-06	0.00046162		-1.06148
TRINITY_DN80371_c4_g4	137.119	307.905	-1.16706	2.4601e-06	0.00046651		-1.16706
TRINITY_DN86654_c2_g3	4147.79	8015.23	-0.950403	2.4632e-06	0.00046651		-0.950403
TRINITY_DN62828_c0_g1	1047.5	2123.89	-1.01975	2.5011e-06	0.00047166		-1.01975
TRINITY_DN77484_c0_g1	2338.99	4549.36	-0.959778	2.5001e-06	0.00047166		-0.959778
TRINITY_DN87406_c7_g1	1627.74	3186.12	-0.968932	2.5209e-06	0.00047472		-0.968932
TRINITY_DN73961_c0_g1	1147.55	2263.79	-0.98018	2.5407e-06	0.00047776		-0.98018
TRINITY_DN77341_c4_g1	349.348	714.532	-1.03233	2.5667e-06	0.00048196		-1.03233
TRINITY_DN84821_c3_g2	752.569	1493.11	-0.988426	2.5775e-06	0.00048331		-0.988426
TRINITY_DN75056_c1_g2	263.414	547.533	-1.05561	2.6032e-06	0.00048674		-1.05561
TRINITY_DN72345_c0_g4	681.033	1365.66	-1.0038	2.6131e-06	0.0004879		-1.0038
TRINITY_DN87333_c3_g1	2319.96	4502.37	-0.956587	2.6592e-06	0.00049582		-0.956587
TRINITY_DN84543_c6_g1	1007.16	1988.55	-0.981433	2.6973e-06	0.0005022		-0.981433
TRINITY_DN73788_c4_g1	515.383	1133.58	-1.13716	2.7097e-06	0.00050379		-1.13716
TRINITY_DN70852_c2_g2	667.361	1324.13	-0.988505	2.7227e-06	0.00050551		-0.988505
TRINITY_DN68354_c3_g1	882.346	1746.07	-0.984691	2.7647e-06	0.00051258		-0.984691
TRINITY_DN70584_c6_g2	1090.32	2149.33	-0.979135	2.7771e-06	0.00051344		-0.979135
TRINITY_DN67565_c0_g1	1221.74	2725.64	-1.15766	2.8143e-06	0.00051886		-1.15766
TRINITY_DN86731_c6_g4	696.253	1390.61	-0.998031	2.8719e-06	0.00052727		-0.998031
TRINITY_DN72077_c3_g1	1177.35	2308.68	-0.971517	2.8846e-06	0.00052842		-0.971517
TRINITY_DN83757_c0_g2	954.049	2040.73	-1.09695	2.8862e-06	0.00052842		-1.09695
TRINITY_DN74283_c2_g1	853.74	1667.72	-0.966009	2.9222e-06	0.00053428		-0.966009
TRINITY_DN77297_c0_g1	1487.36	2893.97	-0.960298	2.9675e-06	0.00054182		-0.960298
TRINITY_DN69016_c2_g1	436.189	875.535	-1.00521	2.9735e-06	0.00054195		-1.00521
TRINITY_DN69971_c8_g1	732.71	1646.37	-1.16797	2.9764e-06	0.00054195		-1.16797
TRINITY_DN70435_c0_g1	975.492	2235.96	-1.19669	3.0149e-06	0.00054387		-1.19669
TRINITY_DN77250_c1_g1	2004.54	3918.97	-0.967201	2.9921e-06	0.00054387		-0.967201
TRINITY_DN78074_c1_g1	1275.93	2492.63	-0.966126	3.02e-06	0.00054387		-0.966126
TRINITY_DN79401_c0_g1	1062.95	2222.3	-1.06398	3.0186e-06	0.00054387		-1.06398
TRINITY_DN79527_c4_g1	1369.17	2670.41	-0.963759	3.0131e-06	0.00054387		-0.963759
TRINITY_DN81615_c3_g1	371.614	760.357	-1.03287	3.0126e-06	0.00054387		-1.03287
TRINITY_DN81754_c0_g2	1615.97	3126.43	-0.952116	3.0131e-06	0.00054387		-0.952116
TRINITY_DN87363_c5_g1	130.907	292.663	-1.1607	2.9969e-06	0.00054387		-1.1607
TRINITY_DN74248_c1_g4	1468.27	2940.25	-1.00182	3.0369e-06	0.00054618		-1.00182
TRINITY_DN78050_c3_g4	410.704	832.535	-1.01941	3.0653e-06	0.00054978		-1.01941
TRINITY_DN78603_c1_g4	410.664	834.215	-1.02246	3.0643e-06	0.00054978		-1.02246
TRINITY_DN83585_c0_g3	41.6704	116.126	-1.4786	3.1103e-06	0.00055711		-1.4786
TRINITY_DN68579_c0_g1	220.243	459.046	-1.05954	3.1399e-06	0.00056164		-1.05954
TRINITY_DN69813_c3_g1	1732.41	3369.96	-0.959949	3.1556e-06	0.00056369		-0.959949
TRINITY_DN78509_c3_g3	21.551	78.0772	-1.85714	3.185e-06	0.00056817		-1.85714
TRINITY_DN72893_c6_g2	971.605	2024.83	-1.05936	3.1919e-06	0.00056863		-1.05936
TRINITY_DN70132_c0_g1	4534.71	8760.48	-0.949999	3.2044e-06	0.00056947		-0.949999
TRINITY_DN83799_c1_g1	5237.46	10699.4	-1.03059	3.2052e-06	0.00056947		-1.03059
TRINITY_DN83636_c4_g2	1910.91	3720.85	-0.961375	3.2169e-06	0.00057078		-0.961375
TRINITY_DN77890_c1_g3	204.447	430.652	-1.07479	3.2943e-06	0.00058215		-1.07479
TRINITY_DN71620_c3_g1	1010.71	1979.82	-0.970003	3.327e-06	0.00058715		-0.970003
TRINITY_DN65074_c4_g1	5.23221	32.1413	-2.61894	3.339e-06	0.00058842		-2.61894
TRINITY_DN77709_c3_g4	42.8302	117.795	-1.45958	3.3431e-06	0.00058842		-1.45958
TRINITY_DN71473_c1_g4	2699.39	5420.78	-1.00587	3.3663e-06	0.00059102		-1.00587
TRINITY_DN77359_c0_g1	1186.33	2498.27	-1.07443	3.3731e-06	0.00059133		-1.07443
TRINITY_DN65255_c0_g1	181.907	781.825	-2.10364	3.394e-06	0.00059421		-2.10364
TRINITY_DN68600_c6_g1	830.07	1633.04	-0.976253	3.4072e-06	0.00059493		-0.976253
TRINITY_DN79425_c1_g1	3487.65	6729.67	-0.948281	3.4034e-06	0.00059493		-0.948281
TRINITY_DN77176_c2_g1	1788.44	3461.13	-0.952545	3.479e-06	0.00060588		-0.952545
TRINITY_DN66072_c5_g4	1573.25	3050.28	-0.955195	3.5288e-06	0.00061294		-0.955195
TRINITY_DN74016_c0_g1	1091.49	2135.23	-0.968092	3.5247e-06	0.00061294		-0.968092
TRINITY_DN84786_c1_g3	21.7634	71.6063	-1.71818	3.6038e-06	0.00062351		-1.71818
TRINITY_DN65487_c1_g2	1613.14	3605.26	-1.16023	3.6744e-06	0.00063406		-1.16023
TRINITY_DN81141_c4_g2	289.505	595.66	-1.0409	3.6809e-06	0.00063412		-1.0409
TRINITY_DN84370_c1_g2	5471.32	10502.6	-0.940785	3.6844e-06	0.00063412		-0.940785
TRINITY_DN84822_c0_g2	467.886	966.497	-1.04661	3.7029e-06	0.00063647		-1.04661
TRINITY_DN69080_c0_g1	1708.91	3305.78	-0.951913	3.7432e-06	0.00064256		-0.951913
TRINITY_DN79563_c0_g1	1281.48	2841.75	-1.14897	3.7522e-06	0.00064274		-1.14897
TRINITY_DN85307_c0_g1	559.132	1114	-0.994494	3.7588e-06	0.00064274		-0.994494
TRINITY_DN74710_c0_g1	79.9606	195.163	-1.28732	3.8017e-06	0.00064755		-1.28732
TRINITY_DN75839_c3_g1	592.584	1177.52	-0.990657	3.7982e-06	0.00064755		-0.990657
TRINITY_DN68412_c4_g6	25.4429	92.0947	-1.85586	3.8292e-06	0.00065043		-1.85586
TRINITY_DN72934_c1_g1	1062.73	2069.03	-0.961178	3.8334e-06	0.00065043		-0.961178
TRINITY_DN65736_c0_g1	734.061	1438.25	-0.970347	3.8601e-06	0.00065412		-0.970347
TRINITY_DN85843_c1_g3	1428.82	2869.33	-1.00588	3.8835e-06	0.00065725		-1.00588
TRINITY_DN63544_c0_g1	2218.23	4268.97	-0.944483	3.9023e-06	0.00065958		-0.944483
TRINITY_DN81563_c4_g2	4585.87	9735.25	-1.08602	3.931e-06	0.00066357		-1.08602
TRINITY_DN79516_c0_g3	162.696	351.67	-1.11204	4.0095e-06	0.00067597		-1.11204
TRINITY_DN79327_c1_g2	1425.21	2764.66	-0.955925	4.0172e-06	0.0006764		-0.955925
TRINITY_DN80706_c1_g2	137.464	301.386	-1.13256	4.0433e-06	0.00067992		-1.13256
TRINITY_DN78272_c3_g2	3619.94	6931.91	-0.937286	4.0676e-06	0.00068314		-0.937286
TRINITY_DN87473_c2_g1	1941.46	3743.06	-0.94708	4.074e-06	0.00068335		-0.94708
TRINITY_DN82333_c3_g5	3.99499	28.6211	-2.84082	4.1784e-06	0.0006982		-2.84082
TRINITY_DN65219_c0_g1	1618.53	3120.39	-0.947043	4.2576e-06	0.00071045		-0.947043
TRINITY_DN65808_c2_g3	441.552	885.114	-1.00328	4.2625e-06	0.00071045		-1.00328
TRINITY_DN70013_c3_g2	4.44058	30.2287	-2.7671	4.2872e-06	0.00071367		-2.7671
TRINITY_DN71546_c2_g1	151.56	328.796	-1.1173	4.2941e-06	0.00071391		-1.1173
TRINITY_DN73923_c0_g1	1479.37	2872.25	-0.957197	4.3117e-06	0.00071504		-0.957197
TRINITY_DN83757_c0_g1	1206.2	2500.31	-1.05164	4.3095e-06	0.00071504		-1.05164
TRINITY_DN82498_c3_g1	2110.1	4051.31	-0.94108	4.3447e-06	0.00071962		-0.94108
TRINITY_DN84765_c0_g1	10321.9	19706	-0.932922	4.4215e-06	0.00073141		-0.932922
TRINITY_DN65542_c6_g1	1425.08	2741.68	-0.944024	4.4481e-06	0.00073489		-0.944024
TRINITY_DN75188_c0_g1	527.505	1346.67	-1.35214	4.4583e-06	0.00073565		-1.35214
TRINITY_DN81418_c0_g2	1072.13	2083.3	-0.958391	4.4709e-06	0.00073682		-0.958391
TRINITY_DN73534_c5_g1	52.4163	138.619	-1.40303	4.4997e-06	0.00073971		-1.40303
TRINITY_DN79137_c2_g1	10.7707	46.7519	-2.11791	4.495e-06	0.00073971		-2.11791
TRINITY_DN83970_c2_g1	1504.62	2965.05	-0.978655	4.523e-06	0.00074262		-0.978655
TRINITY_DN47577_c0_g1	16.9543	60.2739	-1.82988	4.5452e-06	0.00074534		-1.82988
TRINITY_DN79884_c1_g3	339.877	727.784	-1.0985	4.6064e-06	0.00075444		-1.0985
TRINITY_DN63729_c0_g1	1808.1	3570.4	-0.981616	4.6707e-06	0.00076271		-0.981616
TRINITY_DN66008_c0_g2	825.137	1608.69	-0.96318	4.6742e-06	0.00076271		-0.96318
TRINITY_DN69702_c3_g1	486.98	959.632	-0.978621	4.6654e-06	0.00076271		-0.978621
TRINITY_DN83278_c0_g2	2248.45	4764.84	-1.0835	4.7103e-06	0.00076765		-1.0835
TRINITY_DN83048_c1_g1	81.8802	190.858	-1.22091	4.7243e-06	0.00076803		-1.22091
TRINITY_DN86239_c3_g1	822.552	1601.73	-0.961452	4.7238e-06	0.00076803		-0.961452
TRINITY_DN72756_c3_g2	1011.95	1958.59	-0.952682	4.7682e-06	0.00077422		-0.952682
TRINITY_DN64878_c0_g2	4453.89	8504.69	-0.933194	4.7861e-06	0.00077616		-0.933194
TRINITY_DN68004_c1_g1	2402.55	4595.46	-0.935641	4.855e-06	0.00078638		-0.935641
TRINITY_DN67640_c3_g1	1301.76	2510.29	-0.947384	4.929e-06	0.00079739		-0.947384
TRINITY_DN76033_c1_g1	791.358	1557.36	-0.976699	4.9661e-06	0.00080142		-0.976699
TRINITY_DN82533_c1_g5	676.907	1321.5	-0.965147	4.9647e-06	0.00080142		-0.965147
TRINITY_DN76356_c2_g1	43.3245	115.649	-1.4165	4.9831e-06	0.00080188		-1.4165
TRINITY_DN78260_c1_g2	4562.28	8706.44	-0.932326	4.9854e-06	0.00080188		-0.932326
TRINITY_DN85672_c3_g1	391.212	793.468	-1.02022	4.9872e-06	0.00080188		-1.02022
TRINITY_DN81517_c1_g1	1313.15	2939.71	-1.16264	5.0194e-06	0.0008051		-1.16264
TRINITY_DN76634_c2_g3	1778.13	4240.21	-1.25377	5.031e-06	0.00080598		-1.25377
TRINITY_DN81399_c1_g2	297.258	606.09	-1.02782	5.0918e-06	0.00081276		-1.02782
TRINITY_DN67722_c1_g1	2758.6	5541.97	-1.00646	5.1155e-06	0.00081546		-1.00646
TRINITY_DN79462_c1_g1	122.594	355.398	-1.53555	5.1227e-06	0.00081546		-1.53555
TRINITY_DN83615_c0_g2	1.66629	79.8779	-5.58308	5.1272e-06	0.00081546		-5.58308
TRINITY_DN81487_c0_g2	2066.96	3961.98	-0.938706	5.1357e-06	0.00081582		-0.938706
TRINITY_DN66549_c2_g1	123.234	265.431	-1.10694	5.169e-06	0.00082012		-1.10694
TRINITY_DN84358_c1_g2	2202.75	4378.69	-0.991194	5.2734e-06	0.00083569		-0.991194
TRINITY_DN69990_c3_g2	1350.38	2598.92	-0.944542	5.307e-06	0.000839		-0.944542
TRINITY_DN69838_c1_g4	332.322	661.898	-0.994025	5.3466e-06	0.0008442		-0.994025
TRINITY_DN74003_c0_g1	2108.8	4027.02	-0.933291	5.3583e-06	0.0008442		-0.933291
TRINITY_DN68665_c6_g1	84.6543	199.797	-1.23888	5.3858e-06	0.00084739		-1.23888
TRINITY_DN82705_c1_g4	76.8809	183.249	-1.25311	5.3954e-06	0.0008479		-1.25311
TRINITY_DN84815_c2_g2	1084.08	2093.26	-0.949284	5.4139e-06	0.00084878		-0.949284
TRINITY_DN65847_c0_g2	306.229	612.758	-1.0007	5.4712e-06	0.00085573		-1.0007
TRINITY_DN87594_c9_g1	4003.65	7600.07	-0.924697	5.4833e-06	0.00085662		-0.924697
TRINITY_DN66354_c1_g3	1594.55	3173.05	-0.992726	5.5055e-06	0.00085712		-0.992726
TRINITY_DN68012_c1_g1	1495.93	2856.82	-0.933368	5.5127e-06	0.00085712		-0.933368
TRINITY_DN80909_c0_g1	1122.69	2153.4	-0.939664	5.4982e-06	0.00085712		-0.939664
TRINITY_DN82841_c0_g1	20.7611	93.9872	-2.17858	5.519e-06	0.00085712		-2.17858
TRINITY_DN84406_c0_g1	665.707	1292.55	-0.957263	5.5627e-06	0.00086187		-0.957263
TRINITY_DN86686_c1_g3	628.537	1218.81	-0.955402	5.5626e-06	0.00086187		-0.955402
TRINITY_DN80924_c3_g1	21.4575	70.8485	-1.72326	5.6219e-06	0.00087003		-1.72326
TRINITY_DN87780_c8_g3	92.7284	216.189	-1.22121	5.6816e-06	0.00087823		-1.22121
TRINITY_DN62959_c0_g1	0	488.221	#NUM!	5.6968e-06	0.00087955		#NUM!
TRINITY_DN86062_c1_g2	663.23	1321.76	-0.994876	5.7457e-06	0.00088503		-0.994876
TRINITY_DN63441_c0_g1	10777.4	24258	-1.17044	5.8145e-06	0.00089459		-1.17044
TRINITY_DN66997_c2_g1	648.222	1261.01	-0.96002	5.8947e-06	0.00090587		-0.96002
TRINITY_DN84292_c1_g1	1131.06	2177.72	-0.945145	5.9189e-06	0.00090853		-0.945145
TRINITY_DN71351_c3_g3	670.205	1353.89	-1.01443	5.9353e-06	0.00090999		-1.01443
TRINITY_DN72657_c5_g1	2196.83	4177.22	-0.927123	6.0187e-06	0.00092171		-0.927123
TRINITY_DN84556_c0_g2	1976.42	3768.61	-0.931143	6.0305e-06	0.00092244		-0.931143
TRINITY_DN77093_c0_g1	1018.3	1950.57	-0.937732	6.0953e-06	0.00093127		-0.937732
TRINITY_DN70699_c0_g1	1788.04	3818.06	-1.09446	6.1063e-06	0.00093187		-1.09446
TRINITY_DN72830_c0_g2	963.468	1857.92	-0.947378	6.1234e-06	0.00093284		-0.947378
TRINITY_DN75786_c0_g1	6639.13	12518.4	-0.914987	6.1408e-06	0.00093284		-0.914987
TRINITY_DN77134_c4_g2	562.811	1198.13	-1.09007	6.1318e-06	0.00093284		-1.09007
TRINITY_DN79795_c0_g2	587.556	6616.48	-3.49326	6.1383e-06	0.00093284		-3.49326
TRINITY_DN71676_c0_g1	3807.53	7471.11	-0.97247	6.2048e-06	0.00094039		-0.97247
TRINITY_DN67835_c2_g2	1936.6	3696.12	-0.932488	6.255e-06	0.00094601		-0.932488
TRINITY_DN74541_c2_g4	542.11	1052.77	-0.957534	6.2562e-06	0.00094601		-0.957534
TRINITY_DN73148_c0_g1	476.696	935.965	-0.973387	6.308e-06	0.00095274		-0.973387
TRINITY_DN76322_c0_g3	0.993518	17.8895	-4.17042	6.404e-06	0.00096614		-4.17042
TRINITY_DN86465_c4_g1	2.51014	22.9292	-3.19135	6.4181e-06	0.00096716		-3.19135
TRINITY_DN78074_c1_g4	99.7829	224.929	-1.1726	6.4896e-06	0.00097571		-1.1726
TRINITY_DN84618_c0_g1	1378.58	2631.85	-0.932894	6.4838e-06	0.00097571		-0.932894
TRINITY_DN65130_c0_g4	2714.82	5278.4	-0.959247	6.5192e-06	0.00097793		-0.959247
TRINITY_DN77435_c1_g1	68.3818	172.826	-1.33763	6.5122e-06	0.00097793		-1.33763
TRINITY_DN87326_c6_g2	852.074	1635.38	-0.940573	6.5358e-06	0.00097931		-0.940573
TRINITY_DN76807_c0_g1	977.505	1881.25	-0.944518	6.5503e-06	0.00098037		-0.944518
TRINITY_DN78336_c0_g2	783.329	1738.61	-1.15025	6.604e-06	0.00098728		-1.15025
TRINITY_DN78136_c3_g2	1126.62	2153.08	-0.934405	6.6711e-06	0.00099506		-0.934405
TRINITY_DN86783_c1_g1	860.171	1653.41	-0.942746	6.7444e-06	0.0010049		-0.942746
TRINITY_DN73603_c3_g2	3668.4	6901.52	-0.911761	6.7916e-06	0.0010096		-0.911761
TRINITY_DN85602_c2_g3	2034.48	4530.83	-1.15512	6.8049e-06	0.0010105		-1.15512
TRINITY_DN75419_c0_g1	67.5959	1379.06	-4.35061	6.8186e-06	0.0010113		-4.35061
TRINITY_DN82705_c0_g1	771.942	1492.73	-0.951392	6.8286e-06	0.0010117		-0.951392
TRINITY_DN63300_c0_g1	575.724	1398.44	-1.28037	6.8565e-06	0.0010124		-1.28037
TRINITY_DN80541_c4_g1	463.361	917.939	-0.986261	6.8535e-06	0.0010124		-0.986261
TRINITY_DN63844_c0_g1	1468.67	3358.43	-1.19327	6.8655e-06	0.0010126		-1.19327
TRINITY_DN69753_c3_g1	638.352	1358.06	-1.08913	6.883e-06	0.0010141		-1.08913
TRINITY_DN84139_c2_g2	1117.58	2274.85	-1.02539	7.0519e-06	0.0010378		-1.02539
TRINITY_DN69660_c0_g1	1954.08	4064.58	-1.05662	7.0624e-06	0.0010382		-1.05662
TRINITY_DN77409_c3_g4	831.634	1630.84	-0.971595	7.0723e-06	0.0010385		-0.971595
TRINITY_DN74877_c3_g1	329.704	660.468	-1.00231	7.1553e-06	0.0010483		-1.00231
TRINITY_DN78915_c2_g1	923.257	1773.24	-0.941581	7.1551e-06	0.0010483		-0.941581
TRINITY_DN64132_c0_g1	583.511	1589.63	-1.44586	7.2114e-06	0.0010554		-1.44586
TRINITY_DN80616_c1_g1	107.183	356.804	-1.73506	7.2396e-06	0.0010583		-1.73506
TRINITY_DN74873_c0_g2	2701.42	5101.28	-0.917144	7.3194e-06	0.0010665		-0.917144
TRINITY_DN71726_c0_g2	1157.77	2346.19	-1.01897	7.4095e-06	0.0010723		-1.01897
TRINITY_DN78239_c4_g2	2447.02	4557.56	-0.897237	7.4212e-06	0.0010723		-0.897237
TRINITY_DN81401_c1_g5	1878.15	3547.25	-0.917388	7.4122e-06	0.0010723		-0.917388
TRINITY_DN84263_c0_g2	0.517434	15.1942	-4.876	7.4109e-06	0.0010723		-4.876
TRINITY_DN87528_c1_g2	1335.65	2547.2	-0.931369	7.3846e-06	0.0010723		-0.931369
TRINITY_DN74221_c4_g1	846.059	1637.28	-0.952469	7.4332e-06	0.0010724		-0.952469
TRINITY_DN85193_c0_g1	1774.03	3368.19	-0.924943	7.4424e-06	0.0010725		-0.924943
TRINITY_DN66237_c1_g2	2006.35	3789.09	-0.917278	7.5061e-06	0.0010805		-0.917278
TRINITY_DN68355_c2_g2	1076.75	2058.52	-0.93492	7.5621e-06	0.0010874		-0.93492
TRINITY_DN76636_c1_g3	2115.07	4283.75	-1.01817	7.6748e-06	0.0011024		-1.01817
TRINITY_DN76043_c0_g2	435.406	951.172	-1.12735	7.7308e-06	0.0011081		-1.12735
TRINITY_DN78949_c3_g2	1445.59	2733.64	-0.919164	7.7922e-06	0.0011144		-0.919164
TRINITY_DN76358_c1_g3	701.493	1351.89	-0.946471	7.8042e-06	0.0011149		-0.946471
TRINITY_DN80324_c0_g1	5129.28	9637.97	-0.909973	7.8667e-06	0.0011215		-0.909973
TRINITY_DN81724_c3_g3	703.848	1378.91	-0.970191	7.8961e-06	0.0011244		-0.970191
TRINITY_DN82604_c0_g3	3427.32	6431.46	-0.908066	7.926e-06	0.0011275		-0.908066
TRINITY_DN86651_c3_g1	2830.71	5310.45	-0.90767	7.9687e-06	0.0011323		-0.90767
TRINITY_DN75892_c4_g1	1365.77	2592.56	-0.924668	8.0107e-06	0.0011358		-0.924668
TRINITY_DN76968_c0_g2	12313.2	23103.8	-0.90792	8.0041e-06	0.0011358		-0.90792
TRINITY_DN69256_c1_g1	1968.03	3987.79	-1.01883	8.0434e-06	0.0011368		-1.01883
TRINITY_DN86840_c2_g4	402.789	1020.8	-1.3416	8.0395e-06	0.0011368		-1.3416
TRINITY_DN72493_c1_g2	400.023	785.092	-0.972778	8.12e-06	0.0011464		-0.972778
TRINITY_DN82168_c2_g2	4038.18	7702.87	-0.931692	8.1495e-06	0.0011481		-0.931692
TRINITY_DN78667_c0_g2	1444.08	2889.94	-1.00089	8.1667e-06	0.0011493		-1.00089
TRINITY_DN70613_c5_g1	0.584887	15.5984	-4.73709	8.2189e-06	0.0011554		-4.73709
TRINITY_DN67420_c2_g1	3090.44	5839.15	-0.917948	8.2823e-06	0.0011625		-0.917948
TRINITY_DN75714_c3_g2	1630.62	3071.58	-0.913559	8.3031e-06	0.0011636		-0.913559
TRINITY_DN66293_c6_g2	2282.63	4295.25	-0.912045	8.3217e-06	0.0011649		-0.912045
TRINITY_DN73415_c2_g4	902.158	1939.16	-1.10398	8.4131e-06	0.0011765		-1.10398
TRINITY_DN80146_c2_g1	954.945	1821.69	-0.931787	8.4352e-06	0.0011783		-0.931787
TRINITY_DN86038_c2_g1	4496.03	8450.63	-0.910406	8.5245e-06	0.0011895		-0.910406
TRINITY_DN82717_c0_g1	937.647	1790.96	-0.933616	8.5401e-06	0.0011905		-0.933616
TRINITY_DN67615_c0_g1	1921.47	3614.71	-0.911673	8.5733e-06	0.0011938		-0.911673
TRINITY_DN73792_c3_g2	180.421	383.118	-1.08642	8.6035e-06	0.0011968		-1.08642
TRINITY_DN71695_c2_g2	733.999	1433.26	-0.965456	8.678e-06	0.0012058		-0.965456
TRINITY_DN67252_c4_g1	735.086	1407.99	-0.937649	8.7084e-06	0.0012088		-0.937649
TRINITY_DN64098_c0_g1	164.552	348.033	-1.08068	8.7197e-06	0.0012091		-1.08068
TRINITY_DN75859_c0_g3	2045.1	3852.3	-0.913548	8.7288e-06	0.0012091		-0.913548
TRINITY_DN66939_c7_g1	33.5543	191.507	-2.51283	8.7729e-06	0.0012127		-2.51283
TRINITY_DN84868_c3_g2	14.3245	123.393	-3.1067	8.7691e-06	0.0012127		-3.1067
TRINITY_DN77522_c2_g1	705.002	1358.01	-0.945792	8.8714e-06	0.001225		-0.945792
TRINITY_DN87480_c5_g4	311.871	633.824	-1.02313	8.9262e-06	0.0012313		-1.02313
TRINITY_DN62581_c0_g1	33.4534	92.1431	-1.46172	9.0064e-06	0.0012385		-1.46172
TRINITY_DN66060_c4_g1	570.672	1153.23	-1.01495	8.998e-06	0.0012385		-1.01495
TRINITY_DN80967_c0_g1	541.996	1047.06	-0.949983	9.0061e-06	0.0012385		-0.949983
TRINITY_DN87164_c5_g1	1198.2	2272.98	-0.923718	9.1358e-06	0.0012523		-0.923718
TRINITY_DN66266_c0_g3	2411.89	4520.12	-0.906195	9.2113e-06	0.0012614		-0.906195
TRINITY_DN76494_c3_g2	438.081	1124.54	-1.36007	9.2241e-06	0.0012618		-1.36007
TRINITY_DN64964_c0_g1	1109.09	2264.43	-1.02977	9.2459e-06	0.0012624		-1.02977
TRINITY_DN65350_c9_g3	29.0475	82.716	-1.50975	9.2572e-06	0.0012624		-1.50975
TRINITY_DN80354_c2_g6	1909.12	3587.13	-0.90992	9.253e-06	0.0012624		-0.90992
TRINITY_DN82137_c0_g1	2917.28	5479.32	-0.909375	9.2672e-06	0.0012625		-0.909375
TRINITY_DN65207_c6_g1	9654.9	22242.4	-1.20398	9.2869e-06	0.0012626		-1.20398
TRINITY_DN72052_c3_g1	598.421	1157.02	-0.951175	9.2812e-06	0.0012626		-0.951175
TRINITY_DN76067_c5_g3	41.6991	109.901	-1.39812	9.3262e-06	0.0012659		-1.39812
TRINITY_DN78119_c4_g7	1033.02	1962.77	-0.926027	9.3592e-06	0.0012659		-0.926027
TRINITY_DN81781_c3_g2	436.804	850.801	-0.961834	9.3578e-06	0.0012659		-0.961834
TRINITY_DN81886_c0_g2	2099.41	3955.39	-0.91384	9.3399e-06	0.0012659		-0.91384
TRINITY_DN82317_c4_g1	1859.72	3597	-0.951704	9.3479e-06	0.0012659		-0.951704
TRINITY_DN70495_c4_g5	1747.18	3646.42	-1.06146	9.4278e-06	0.0012738		-1.06146
TRINITY_DN68009_c2_g1	924.663	1845.67	-0.997148	9.4962e-06	0.0012814		-0.997148
TRINITY_DN87711_c5_g1	255.742	512.235	-1.00211	9.5029e-06	0.0012814		-1.00211
TRINITY_DN82730_c1_g1	2965.4	5518.78	-0.896124	9.5347e-06	0.0012843		-0.896124
TRINITY_DN63472_c0_g1	399.713	778.864	-0.962407	9.6003e-06	0.0012905		-0.962407
TRINITY_DN85147_c2_g1	2903.18	5713.3	-0.97669	9.6336e-06	0.0012924		-0.97669
TRINITY_DN62126_c0_g1	89.5391	226.181	-1.33689	9.6971e-06	0.0012996		-1.33689
TRINITY_DN62921_c0_g1	882.21	1678.24	-0.927754	9.7115e-06	0.0013002		-0.927754
TRINITY_DN80239_c1_g3	2259.46	4266.11	-0.916942	9.7794e-06	0.001308		-0.916942
TRINITY_DN68596_c1_g1	115.272	290.896	-1.33547	9.8067e-06	0.0013103		-1.33547
TRINITY_DN66758_c3_g3	1143.17	2279.56	-0.995713	9.8173e-06	0.0013104		-0.995713
TRINITY_DN71405_c1_g1	1609.63	3023.17	-0.909334	9.8401e-06	0.0013108		-0.909334
TRINITY_DN87380_c2_g1	989.367	1883.04	-0.928482	9.8338e-06	0.0013108		-0.928482
TRINITY_DN73720_c4_g3	580.63	1298.89	-1.16159	9.9733e-06	0.0013272		-1.16159
TRINITY_DN65376_c0_g1	1898.92	4139.36	-1.12423	9.9934e-06	0.0013285		-1.12423
TRINITY_DN53129_c0_g1	1173.94	2217.85	-0.9178	1.0048e-05	0.001333		-0.9178
TRINITY_DN76713_c0_g2	4.48193	31.5577	-2.8158	1.0057e-05	0.001333		-2.8158
TRINITY_DN75398_c0_g1	1270.26	2389.57	-0.911629	1.0076e-05	0.0013341		-0.911629
TRINITY_DN87195_c3_g1	1454.85	2995.13	-1.04175	1.0114e-05	0.0013378		-1.04175
TRINITY_DN77948_c0_g3	2444.88	4568.19	-0.901859	1.0167e-05	0.0013429		-0.901859
TRINITY_DN82047_c5_g2	1104.12	2088.88	-0.919837	1.0173e-05	0.0013429		-0.919837
TRINITY_DN69336_c0_g1	2598.85	4831.8	-0.894684	1.0258e-05	0.0013515		-0.894684
TRINITY_DN81542_c3_g4	33.4716	91.6289	-1.45287	1.0275e-05	0.0013523		-1.45287
TRINITY_DN79868_c4_g2	329.649	651.519	-0.982877	1.0328e-05	0.0013579		-0.982877
TRINITY_DN81772_c3_g1	249.426	502.674	-1.01101	1.0637e-05	0.0013961		-1.01101
TRINITY_DN84983_c3_g1	1700.67	3974.9	-1.22481	1.065e-05	0.0013961		-1.22481
TRINITY_DN74877_c4_g1	620.912	1413.45	-1.18676	1.0823e-05	0.0014167		-1.18676
TRINITY_DN83484_c2_g2	48.4206	123.466	-1.35042	1.0839e-05	0.0014167		-1.35042
TRINITY_DN84401_c5_g1	677.613	1289.9	-0.928729	1.0838e-05	0.0014167		-0.928729
TRINITY_DN78243_c2_g1	3280.74	6414.19	-0.967244	1.089e-05	0.0014219		-0.967244
TRINITY_DN79474_c1_g2	1997.19	3729.5	-0.901014	1.0939e-05	0.0014268		-0.901014
TRINITY_DN81601_c1_g1	57.938	145.393	-1.32738	1.1008e-05	0.001434		-1.32738
TRINITY_DN84650_c4_g1	12.2499	48.9889	-1.99968	1.1015e-05	0.001434		-1.99968
TRINITY_DN87716_c7_g1	2051.79	3828.27	-0.899808	1.1045e-05	0.001435		-0.899808
TRINITY_DN72044_c3_g7	445.684	868.778	-0.962967	1.1115e-05	0.0014427		-0.962967
TRINITY_DN70275_c3_g2	192.635	424.683	-1.14052	1.1145e-05	0.0014452		-1.14052
TRINITY_DN77107_c0_g3	13.874	119.599	-3.10774	1.1172e-05	0.0014473		-3.10774
TRINITY_DN81367_c2_g8	1195.16	2892.32	-1.27503	1.1369e-05	0.0014713		-1.27503
TRINITY_DN82668_c1_g2	796.599	1525.95	-0.937785	1.1384e-05	0.0014719		-0.937785
TRINITY_DN62928_c0_g1	0	377.78	#NUM!	1.1433e-05	0.0014767		#NUM!
TRINITY_DN70756_c0_g2	1185.25	2233.99	-0.914428	1.1458e-05	0.0014785		-0.914428
TRINITY_DN64306_c0_g1	10878.6	20181.8	-0.891569	1.1491e-05	0.0014795		-0.891569
TRINITY_DN72663_c3_g1	1198.66	3107.27	-1.37423	1.1499e-05	0.0014795		-1.37423
TRINITY_DN70243_c2_g1	3416.88	6361.93	-0.896786	1.1588e-05	0.0014879		-0.896786
TRINITY_DN70872_c0_g2	1058.33	2478.25	-1.22753	1.1598e-05	0.0014879		-1.22753
TRINITY_DN78958_c1_g1	790.315	1497.54	-0.922096	1.1592e-05	0.0014879		-0.922096
TRINITY_DN80492_c0_g2	1530.75	3573.8	-1.22322	1.1676e-05	0.0014965		-1.22322
TRINITY_DN77196_c5_g4	1661.61	3118.02	-0.908047	1.1733e-05	0.0015022		-0.908047
TRINITY_DN73497_c2_g5	1033.33	2099.24	-1.02257	1.1765e-05	0.0015049		-1.02257
TRINITY_DN73987_c4_g4	62.5799	149.004	-1.25158	1.1965e-05	0.0015275		-1.25158
TRINITY_DN63267_c0_g1	1351.31	2536.11	-0.908258	1.2031e-05	0.0015314		-0.908258
TRINITY_DN83130_c1_g1	2484.33	4660.49	-0.907624	1.2018e-05	0.0015314		-0.907624
TRINITY_DN87142_c1_g2	3545.67	6591.62	-0.894575	1.202e-05	0.0015314		-0.894575
TRINITY_DN81697_c2_g3	673.907	1276.14	-0.921159	1.2132e-05	0.0015428		-0.921159
TRINITY_DN75288_c3_g1	476.607	917.787	-0.94536	1.2238e-05	0.0015519		-0.94536
TRINITY_DN76431_c4_g1	925.806	1966.77	-1.08705	1.2235e-05	0.0015519		-1.08705
TRINITY_DN80859_c0_g6	1105.58	2079.25	-0.911254	1.2228e-05	0.0015519		-0.911254
TRINITY_DN85670_c0_g2	447.992	866.94	-0.95246	1.2308e-05	0.0015589		-0.95246
TRINITY_DN85861_c2_g1	1448.58	2737.12	-0.91802	1.2317e-05	0.0015589		-0.91802
TRINITY_DN74805_c3_g2	2127.28	4159.16	-0.967284	1.2433e-05	0.0015705		-0.967284
TRINITY_DN69644_c0_g1	99.6283	220.099	-1.14352	1.2467e-05	0.0015733		-1.14352
TRINITY_DN72139_c0_g1	2176.57	4227.72	-0.957822	1.253e-05	0.0015768		-0.957822
TRINITY_DN81950_c0_g1	489.591	942.312	-0.944629	1.2522e-05	0.0015768		-0.944629
TRINITY_DN68315_c4_g1	855.903	1612.93	-0.914161	1.2547e-05	0.0015775		-0.914161
TRINITY_DN83843_c4_g1	2067.63	3855.93	-0.899096	1.2568e-05	0.0015786		-0.899096
TRINITY_DN65875_c0_g4	8696.66	18083.9	-1.05617	1.2614e-05	0.001581		-1.05617
TRINITY_DN76624_c3_g1	1957.15	3656.26	-0.901617	1.2605e-05	0.001581		-0.901617
TRINITY_DN87258_c3_g1	887.399	1873.7	-1.07823	1.2723e-05	0.001592		-1.07823
TRINITY_DN78346_c0_g1	1097	2184.61	-0.993813	1.2748e-05	0.0015932		-0.993813
TRINITY_DN83697_c6_g1	3829.78	7102.33	-0.891032	1.2757e-05	0.0015932		-0.891032
TRINITY_DN82431_c0_g2	322.853	629.96	-0.964381	1.2784e-05	0.0015951		-0.964381
TRINITY_DN78404_c1_g3	3426.63	6347.57	-0.889414	1.2929e-05	0.0016117		-0.889414
TRINITY_DN70139_c1_g2	763.268	1447.2	-0.923001	1.3013e-05	0.00162		-0.923001
TRINITY_DN83208_c0_g1	1464.36	2742.89	-0.905427	1.3021e-05	0.00162		-0.905427
TRINITY_DN68090_c1_g3	1221.94	2289.41	-0.905809	1.3037e-05	0.0016206		-0.905809
TRINITY_DN84054_c2_g1	1144.29	2143.76	-0.905692	1.3068e-05	0.0016229		-0.905692
TRINITY_DN78105_c1_g1	3226.52	5969.62	-0.887659	1.31e-05	0.0016253		-0.887659
TRINITY_DN82312_c2_g4	1804.39	3498.55	-0.955246	1.3302e-05	0.0016472		-0.955246
TRINITY_DN76629_c1_g4	1568.96	3311.32	-1.0776	1.3456e-05	0.0016648		-1.0776
TRINITY_DN83024_c0_g2	1639.06	3530.3	-1.10693	1.3485e-05	0.0016668		-1.10693
TRINITY_DN79499_c0_g3	478.613	906.809	-0.921939	1.3518e-05	0.0016693		-0.921939
TRINITY_DN83539_c3_g7	516.404	1039.71	-1.00961	1.3639e-05	0.0016827		-1.00961
TRINITY_DN67330_c1_g2	1449.92	2690.69	-0.891999	1.3705e-05	0.0016892		-0.891999
TRINITY_DN70859_c1_g4	1465.1	2729.72	-0.897754	1.3742e-05	0.0016906		-0.897754
TRINITY_DN73415_c2_g2	168.135	384.445	-1.19316	1.383e-05	0.001698		-1.19316
TRINITY_DN75354_c5_g1	331.296	644.152	-0.959279	1.3823e-05	0.001698		-0.959279
TRINITY_DN79395_c0_g3	695.914	1548.47	-1.15386	1.3841e-05	0.001698		-1.15386
TRINITY_DN82030_c2_g3	3541.32	7577.24	-1.09738	1.3971e-05	0.0017124		-1.09738
TRINITY_DN86422_c1_g1	1072.48	2010.09	-0.906305	1.4121e-05	0.0017292		-0.906305
TRINITY_DN64457_c0_g1	1.4696	18.9965	-3.69224	1.4264e-05	0.0017393		-3.69224
TRINITY_DN80596_c3_g1	41.4024	108.266	-1.38679	1.4267e-05	0.0017393		-1.38679
TRINITY_DN83405_c3_g1	2136.68	4131.61	-0.951333	1.4269e-05	0.0017393		-0.951333
TRINITY_DN85917_c1_g3	1460.55	2715.59	-0.894754	1.4238e-05	0.0017393		-0.894754
TRINITY_DN79377_c0_g1	2307.45	4263.42	-0.885711	1.4355e-05	0.0017481		-0.885711
TRINITY_DN82870_c7_g3	565.778	1074.16	-0.924901	1.4416e-05	0.001754		-0.924901
TRINITY_DN75876_c4_g1	2866.94	5455.89	-0.9283	1.4503e-05	0.0017629		-0.9283
TRINITY_DN86940_c8_g2	45.5691	118.154	-1.37454	1.4606e-05	0.0017738		-1.37454
TRINITY_DN63386_c0_g1	1955.84	3616.01	-0.886613	1.4884e-05	0.0018042		-0.886613
TRINITY_DN73095_c0_g1	1600.68	2967.87	-0.890745	1.499e-05	0.0018138		-0.890745
TRINITY_DN84532_c3_g1	1486.19	3048.76	-1.0366	1.5021e-05	0.0018158		-1.0366
TRINITY_DN79760_c0_g1	1402.17	2610.3	-0.896548	1.5076e-05	0.0018207		-0.896548
TRINITY_DN83689_c2_g5	527.917	1006.39	-0.930809	1.527e-05	0.0018409		-0.930809
TRINITY_DN77195_c1_g4	352.624	677.644	-0.942395	1.5417e-05	0.0018569		-0.942395
TRINITY_DN82269_c2_g2	48.3122	120.642	-1.32027	1.5525e-05	0.0018682		-1.32027
TRINITY_DN77987_c3_g4	106.209	227.468	-1.09876	1.556e-05	0.0018707		-1.09876
TRINITY_DN73894_c1_g1	187.207	375.779	-1.00525	1.5614e-05	0.0018754		-1.00525
TRINITY_DN83898_c0_g1	999.636	1870.69	-0.904093	1.5647e-05	0.0018778		-0.904093
TRINITY_DN64945_c0_g1	30.2905	84.5956	-1.48172	1.5902e-05	0.0019032		-1.48172
TRINITY_DN65604_c0_g1	116.158	247.674	-1.09236	1.6012e-05	0.0019146		-1.09236
TRINITY_DN75472_c2_g2	510.846	969.322	-0.924086	1.6087e-05	0.0019206		-0.924086
TRINITY_DN81817_c2_g3	47.5046	119.969	-1.33653	1.614e-05	0.0019247		-1.33653
TRINITY_DN68449_c1_g1	1749.3	3246.67	-0.892185	1.6183e-05	0.001928		-0.892185
TRINITY_DN72188_c0_g1	1543.19	3122.59	-1.01683	1.6233e-05	0.0019305		-1.01683
TRINITY_DN86708_c3_g3	1294.92	2401.36	-0.890992	1.623e-05	0.0019305		-0.890992
TRINITY_DN75814_c1_g2	4122.75	7581.34	-0.878848	1.6329e-05	0.0019384		-0.878848
TRINITY_DN86950_c1_g3	435.303	835.861	-0.941242	1.641e-05	0.0019463		-0.941242
TRINITY_DN65456_c3_g3	13.6125	49.9546	-1.87569	1.6577e-05	0.0019595		-1.87569
TRINITY_DN66337_c2_g2	8709.4	16042.9	-0.881288	1.6564e-05	0.0019595		-0.881288
TRINITY_DN79470_c2_g4	615.526	1157.66	-0.911318	1.6603e-05	0.0019595		-0.911318
TRINITY_DN84707_c0_g1	737.334	1387.41	-0.912002	1.6573e-05	0.0019595		-0.912002
TRINITY_DN87624_c9_g3	142.733	296.68	-1.05559	1.6609e-05	0.0019595		-1.05559
TRINITY_DN77182_c2_g5	594.903	1122.41	-0.915868	1.6652e-05	0.0019626		-0.915868
TRINITY_DN80260_c0_g1	537.33	1016.75	-0.920084	1.6704e-05	0.001967		-0.920084
TRINITY_DN63641_c0_g1	168.495	343.3	-1.02676	1.6747e-05	0.0019686		-1.02676
TRINITY_DN87122_c2_g6	407.552	875.481	-1.10309	1.6743e-05	0.0019686		-1.10309
TRINITY_DN77293_c4_g1	905.862	1738.93	-0.940838	1.68e-05	0.001973		-0.940838
TRINITY_DN82935_c5_g1	694.26	1447.63	-1.06014	1.685e-05	0.0019772		-1.06014
TRINITY_DN60564_c0_g1	1753.44	3217.4	-0.87571	1.6879e-05	0.0019788		-0.87571
TRINITY_DN73450_c0_g1	540.691	1026.42	-0.924741	1.7089e-05	0.0020017		-0.924741
TRINITY_DN86306_c0_g1	1533.33	2846.16	-0.892348	1.7107e-05	0.002002		-0.892348
TRINITY_DN64323_c0_g1	503.781	1085.71	-1.10777	1.7166e-05	0.0020036		-1.10777
TRINITY_DN83264_c0_g1	4389.79	8619.2	-0.973403	1.7151e-05	0.0020036		-0.973403
TRINITY_DN85521_c1_g4	1095.3	2036.1	-0.89448	1.7241e-05	0.0020105		-0.89448
TRINITY_DN73469_c0_g1	3642.62	6698.59	-0.878883	1.7295e-05	0.0020151		-0.878883
TRINITY_DN80059_c1_g1	1556.57	2873.14	-0.88426	1.7452e-05	0.0020315		-0.88426
TRINITY_DN69599_c2_g2	2126.28	3923.47	-0.8838	1.747e-05	0.0020319		-0.8838
TRINITY_DN76883_c2_g1	2822.7	5199.98	-0.88143	1.7511e-05	0.0020348		-0.88143
TRINITY_DN57768_c0_g1	799.054	1496.14	-0.904883	1.7601e-05	0.0020435		-0.904883
TRINITY_DN86512_c3_g1	2429.69	4588.69	-0.917313	1.7647e-05	0.002047		-0.917313
TRINITY_DN82998_c1_g1	557.871	1209.92	-1.11691	1.7699e-05	0.0020512		-1.11691
TRINITY_DN70263_c2_g2	987.802	1832.86	-0.891803	1.7736e-05	0.002052		-0.891803
TRINITY_DN75469_c0_g1	1223.04	2268	-0.890945	1.7724e-05	0.002052		-0.890945
TRINITY_DN75888_c0_g1	1297.94	2687.17	-1.04986	1.7865e-05	0.0020651		-1.04986
TRINITY_DN87420_c2_g1	3613.72	6631.35	-0.875818	1.7909e-05	0.0020683		-0.875818
TRINITY_DN76810_c0_g1	984.756	1830.65	-0.894517	1.7967e-05	0.0020732		-0.894517
TRINITY_DN80138_c4_g2	2278.59	4203.29	-0.883378	1.8034e-05	0.0020773		-0.883378
TRINITY_DN63620_c0_g1	1475.66	2716.82	-0.880557	1.832e-05	0.0021066		-0.880557
TRINITY_DN80341_c2_g2	663.267	1467.1	-1.1453	1.8388e-05	0.0021126		-1.1453
TRINITY_DN76419_c8_g2	1.70764	57.2357	-5.06684	1.8527e-05	0.0021248		-5.06684
TRINITY_DN62639_c0_g1	1142.26	2110.39	-0.885619	1.8656e-05	0.0021359		-0.885619
TRINITY_DN71359_c2_g1	574.358	1228.68	-1.09709	1.8642e-05	0.0021359		-1.09709
TRINITY_DN86863_c1_g3	1297.82	2503.46	-0.947833	1.8751e-05	0.0021449		-0.947833
TRINITY_DN70664_c0_g1	4.31701	28.8571	-2.74082	1.8846e-05	0.0021502		-2.74082
TRINITY_DN76811_c1_g2	29.1967	82.4128	-1.49706	1.8836e-05	0.0021502		-1.49706
TRINITY_DN82744_c0_g1	688.141	1292.36	-0.90923	1.888e-05	0.0021522		-0.90923
TRINITY_DN67819_c0_g1	2129.04	3918.63	-0.880147	1.896e-05	0.0021594		-0.880147
TRINITY_DN72213_c0_g1	2174.58	3976.95	-0.870927	1.8981e-05	0.00216		-0.870927
TRINITY_DN70033_c0_g1	1432.32	2651.55	-0.888483	1.9021e-05	0.0021609		-0.888483
TRINITY_DN71284_c4_g1	8165.47	14924.4	-0.870062	1.902e-05	0.0021609		-0.870062
TRINITY_DN63486_c0_g1	26.4208	105.283	-1.99453	1.9072e-05	0.0021632		-1.99453
TRINITY_DN80975_c1_g2	1813.45	3327.35	-0.875642	1.9108e-05	0.0021632		-0.875642
TRINITY_DN84418_c0_g2	291.229	628.969	-1.11084	1.9106e-05	0.0021632		-1.11084
TRINITY_DN74575_c5_g1	1402.98	2642.45	-0.913384	1.9162e-05	0.0021657		-0.913384
TRINITY_DN63460_c0_g1	1960.16	3606.68	-0.879698	1.9222e-05	0.0021706		-0.879698
TRINITY_DN62462_c0_g1	643.347	1210.13	-0.911497	1.9283e-05	0.0021757		-0.911497
TRINITY_DN78258_c2_g1	2893.53	5305.53	-0.874668	1.9422e-05	0.0021894		-0.874668
TRINITY_DN74366_c1_g1	304.451	694.137	-1.18901	1.9513e-05	0.0021903		-1.18901
TRINITY_DN83579_c0_g2	1024.21	1903.2	-0.893914	1.9512e-05	0.0021903		-0.893914
TRINITY_DN87786_c14_g1	1931.15	3543.12	-0.875558	1.9486e-05	0.0021903		-0.875558
TRINITY_DN72436_c1_g1	161.15	329.222	-1.03066	1.9546e-05	0.0021922		-1.03066
TRINITY_DN68334_c2_g2	0	10.6256	#NUM!	1.9664e-05	0.0022035		#NUM!
TRINITY_DN71253_c3_g1	1151.03	2122.61	-0.88291	1.9841e-05	0.0022216		-0.88291
TRINITY_DN84509_c1_g2	348.586	669.616	-0.941818	2.0006e-05	0.0022381		-0.941818
TRINITY_DN70038_c2_g1	1183.73	2186.95	-0.885579	2.035e-05	0.0022727		-0.885579
TRINITY_DN74497_c4_g3	3410.57	6237.62	-0.870984	2.05e-05	0.0022856		-0.870984
TRINITY_DN81414_c0_g2	65.2301	151.271	-1.21352	2.0632e-05	0.0022965		-1.21352
TRINITY_DN86551_c3_g1	1122.75	2080.82	-0.890119	2.0921e-05	0.0023247		-0.890119
TRINITY_DN85325_c4_g2	3411.4	6207.81	-0.863721	2.1107e-05	0.0023434		-0.863721
TRINITY_DN85503_c2_g1	3085.65	6139.76	-0.992605	2.1252e-05	0.0023556		-0.992605
TRINITY_DN85560_c1_g2	628.737	1215.46	-0.950975	2.1346e-05	0.0023639		-0.950975
TRINITY_DN80173_c2_g1	548.047	1030.65	-0.911177	2.151e-05	0.0023781		-0.911177
TRINITY_DN69509_c1_g1	274.977	580.545	-1.0781	2.1656e-05	0.0023922		-1.0781
TRINITY_DN71940_c2_g4	831.32	1545.8	-0.89488	2.1677e-05	0.0023926		-0.89488
TRINITY_DN81897_c3_g2	1286.14	2754.02	-1.09848	2.1728e-05	0.0023962		-1.09848
TRINITY_DN79413_c1_g2	1073.81	1975.07	-0.87916	2.1773e-05	0.0023992		-0.87916
TRINITY_DN64789_c3_g1	3280.19	5978.24	-0.865941	2.1863e-05	0.0024068		-0.865941
TRINITY_DN73012_c1_g2	3367.67	6723.28	-0.997414	2.1986e-05	0.0024146		-0.997414
TRINITY_DN75488_c3_g5	472.026	892.435	-0.918882	2.1972e-05	0.0024146		-0.918882
TRINITY_DN63168_c0_g1	10.4983	41.1888	-1.9721	2.2012e-05	0.0024154		-1.9721
TRINITY_DN66433_c3_g2	4042.93	7346.72	-0.861697	2.2112e-05	0.0024235		-0.861697
TRINITY_DN75760_c0_g1	484.412	950.339	-0.972208	2.2123e-05	0.0024235		-0.972208
TRINITY_DN68859_c0_g1	711.738	1330.39	-0.902436	2.2219e-05	0.0024304		-0.902436
TRINITY_DN74173_c0_g1	294.878	567.931	-0.945597	2.2222e-05	0.0024304		-0.945597
TRINITY_DN79900_c0_g2	386.006	833.223	-1.11008	2.2307e-05	0.0024377		-1.11008
TRINITY_DN69562_c0_g2	1004.69	1969.22	-0.970881	2.2332e-05	0.0024384		-0.970881
TRINITY_DN77286_c3_g1	1260.44	2321.09	-0.880879	2.2374e-05	0.0024409		-0.880879
TRINITY_DN77236_c1_g2	112.688	244.203	-1.11574	2.2417e-05	0.0024436		-1.11574
TRINITY_DN82832_c1_g1	2985.73	5946.64	-0.993992	2.2456e-05	0.0024459		-0.993992
TRINITY_DN67419_c6_g1	161.834	527.486	-1.70462	2.2522e-05	0.002449		-1.70462
TRINITY_DN80215_c2_g1	2334.27	4235.9	-0.859698	2.2521e-05	0.002449		-0.859698
TRINITY_DN76624_c2_g1	689.93	1287.82	-0.900413	2.2543e-05	0.0024492		-0.900413
TRINITY_DN72133_c0_g1	1515.84	3018.61	-0.993772	2.2592e-05	0.0024525		-0.993772
TRINITY_DN67909_c1_g3	2186.95	3982.93	-0.864912	2.2819e-05	0.0024731		-0.864912
TRINITY_DN64384_c0_g1	7661.92	17320	-1.17666	2.3178e-05	0.0025018		-1.17666
TRINITY_DN68097_c3_g3	5827.18	10534	-0.854191	2.3162e-05	0.0025018		-0.854191
TRINITY_DN72694_c9_g1	44.9547	114.664	-1.35087	2.3155e-05	0.0025018		-1.35087
TRINITY_DN76625_c4_g5	6711.17	12201.8	-0.862454	2.3173e-05	0.0025018		-0.862454
TRINITY_DN81279_c6_g1	1593.75	2921.24	-0.874154	2.3292e-05	0.0025079		-0.874154
TRINITY_DN86503_c2_g1	1101.43	2022.28	-0.87661	2.3284e-05	0.0025079		-0.87661
TRINITY_DN82564_c0_g1	41.2403	108.613	-1.39707	2.3376e-05	0.0025127		-1.39707
TRINITY_DN84923_c2_g3	665.094	1238.96	-0.897501	2.3393e-05	0.0025127		-0.897501
TRINITY_DN86545_c1_g1	673.268	1252.3	-0.895326	2.3361e-05	0.0025127		-0.895326
TRINITY_DN64353_c0_g1	804.77	1492.23	-0.890819	2.3576e-05	0.00252		-0.890819
TRINITY_DN74890_c2_g2	2835.89	5180.1	-0.869176	2.3516e-05	0.00252		-0.869176
TRINITY_DN75460_c1_g1	134.954	279.758	-1.05171	2.3513e-05	0.00252		-1.05171
TRINITY_DN82295_c2_g1	414.842	786.503	-0.92289	2.3566e-05	0.00252		-0.92289
TRINITY_DN83777_c2_g4	750.009	1394.37	-0.89463	2.3569e-05	0.00252		-0.89463
TRINITY_DN85617_c1_g1	2016.55	3675.52	-0.866062	2.3548e-05	0.00252		-0.866062
TRINITY_DN76184_c1_g1	1531.23	2802.75	-0.872149	2.3688e-05	0.0025299		-0.872149
TRINITY_DN73080_c3_g1	28.5162	80.3153	-1.49389	2.4014e-05	0.0025606		-1.49389
TRINITY_DN81808_c2_g2	1208.2	2205.98	-0.868568	2.3997e-05	0.0025606		-0.868568
TRINITY_DN75592_c0_g1	2686.29	5013.22	-0.900125	2.4404e-05	0.0025979		-0.900125
TRINITY_DN82227_c2_g2	3646.24	6611.12	-0.858484	2.4398e-05	0.0025979		-0.858484
TRINITY_DN69246_c1_g3	339.391	645.405	-0.927258	2.4764e-05	0.002632		-0.927258
TRINITY_DN66099_c10_g1	21.6485	67.4127	-1.63875	2.4797e-05	0.0026334		-1.63875
TRINITY_DN71166_c0_g1	1429.43	2985.56	-1.06257	2.4845e-05	0.0026364		-1.06257
TRINITY_DN68355_c2_g4	423.615	801.9	-0.920669	2.4904e-05	0.0026406		-0.920669
TRINITY_DN71135_c3_g5	1354.62	2483.68	-0.87459	2.5076e-05	0.0026525		-0.87459
TRINITY_DN76164_c2_g5	3000.14	5447.35	-0.860524	2.5097e-05	0.0026525		-0.860524
TRINITY_DN79251_c1_g1	2159.86	3954.61	-0.872601	2.5081e-05	0.0026525		-0.872601
TRINITY_DN87181_c0_g1	1433.85	2845.95	-0.989017	2.52e-05	0.0026613		-0.989017
TRINITY_DN68019_c0_g2	562.62	1269.31	-1.17382	2.5274e-05	0.0026669		-1.17382
TRINITY_DN68449_c1_g2	1219.95	2232.89	-0.872084	2.5394e-05	0.0026711		-0.872084
TRINITY_DN85753_c2_g1	8.01169	36.2517	-2.17787	2.5394e-05	0.0026711		-2.17787
TRINITY_DN67746_c1_g1	1.59365	18.2033	-3.51379	2.5459e-05	0.0026758		-3.51379
TRINITY_DN75384_c2_g2	1035.24	2182.84	-1.07624	2.5512e-05	0.0026792		-1.07624
TRINITY_DN68592_c2_g1	420.021	796.106	-0.922499	2.5631e-05	0.0026896		-0.922499
TRINITY_DN80107_c0_g2	1271.97	2323.67	-0.869344	2.587e-05	0.0027125		-0.869344
TRINITY_DN78521_c0_g1	576.894	1085.69	-0.912234	2.6029e-05	0.0027248		-0.912234
TRINITY_DN76092_c6_g1	1035.46	2260.52	-1.12638	2.6124e-05	0.0027304		-1.12638
TRINITY_DN74424_c2_g1	586.459	1092.61	-0.897681	2.6179e-05	0.0027319		-0.897681
TRINITY_DN74511_c2_g2	2190.05	4001.61	-0.869614	2.6171e-05	0.0027319		-0.869614
TRINITY_DN79590_c0_g1	426.93	803.62	-0.912515	2.631e-05	0.0027433		-0.912515
TRINITY_DN68736_c1_g2	1.9405	128.082	-6.0445	2.6502e-05	0.0027612		-6.0445
TRINITY_DN85865_c3_g1	277.219	532.255	-0.941092	2.6774e-05	0.0027851		-0.941092
TRINITY_DN86801_c1_g1	259.464	508.612	-0.971031	2.6757e-05	0.0027851		-0.971031
TRINITY_DN80437_c2_g1	3439.82	6809.49	-0.985215	2.6807e-05	0.0027856		-0.985215
TRINITY_DN81639_c0_g1	12.9989	75.3538	-2.53529	2.6821e-05	0.0027856		-2.53529
TRINITY_DN76275_c5_g1	694.274	1928.85	-1.47416	2.7056e-05	0.0028078		-1.47416
TRINITY_DN77229_c2_g1	337.855	643.861	-0.930342	2.7117e-05	0.002812		-0.930342
TRINITY_DN71765_c2_g1	79.1094	176.502	-1.15776	2.7171e-05	0.0028153		-1.15776
TRINITY_DN76944_c0_g1	396.263	783.602	-0.983665	2.7231e-05	0.0028194		-0.983665
TRINITY_DN71864_c2_g2	24.6204	71.1882	-1.53178	2.726e-05	0.0028202		-1.53178
TRINITY_DN64754_c5_g9	0	201.524	#NUM!	2.7329e-05	0.0028239		#NUM!
TRINITY_DN76766_c1_g2	588.701	1088.53	-0.886772	2.7342e-05	0.0028239		-0.886772
TRINITY_DN81557_c3_g1	3546.05	6403.9	-0.852736	2.736e-05	0.0028239		-0.852736
TRINITY_DN69293_c0_g1	295.629	567.487	-0.940799	2.7491e-05	0.0028314		-0.940799
TRINITY_DN85652_c3_g1	25.3738	72.535	-1.51534	2.7611e-05	0.0028387		-1.51534
TRINITY_DN80313_c1_g1	532.34	993.488	-0.900154	2.7664e-05	0.0028419		-0.900154
TRINITY_DN82611_c0_g5	395.627	1088.03	-1.4595	2.7757e-05	0.0028492		-1.4595
TRINITY_DN71335_c2_g1	859.273	1570.33	-0.869881	2.7844e-05	0.0028556		-0.869881
TRINITY_DN82671_c0_g2	416.48	788.305	-0.920507	2.7983e-05	0.0028658		-0.920507
TRINITY_DN69688_c1_g3	82.7542	270.319	-1.70776	2.8092e-05	0.0028703		-1.70776
TRINITY_DN74585_c2_g6	1498.92	2735.57	-0.86792	2.8089e-05	0.0028703		-0.86792
TRINITY_DN76282_c4_g7	518.437	967.972	-0.900795	2.8081e-05	0.0028703		-0.900795
TRINITY_DN75804_c0_g1	1093.72	2213.36	-1.017	2.8323e-05	0.0028894		-1.017
TRINITY_DN68321_c1_g5	702.752	1290.87	-0.877255	2.8431e-05	0.002896		-0.877255
TRINITY_DN77642_c2_g2	665.194	1328.49	-0.997935	2.843e-05	0.002896		-0.997935
TRINITY_DN83526_c1_g1	1391.21	2924.7	-1.07195	2.8482e-05	0.0028989		-1.07195
TRINITY_DN84770_c0_g2	2120.49	4071.57	-0.94119	2.8589e-05	0.0029075		-0.94119
TRINITY_DN76437_c3_g1	649.679	1203.77	-0.889756	2.8739e-05	0.0029205		-0.889756
TRINITY_DN83551_c2_g1	569.179	1053.45	-0.888171	2.9188e-05	0.0029615		-0.888171
TRINITY_DN75922_c5_g1	42.3648	925.914	-4.44994	2.9247e-05	0.002963		-4.44994
TRINITY_DN76641_c2_g2	44.3882	171.076	-1.94638	2.9342e-05	0.0029681		-1.94638
TRINITY_DN64073_c0_g1	18905.9	33898.1	-0.842366	2.9404e-05	0.0029721		-0.842366
TRINITY_DN78988_c2_g2	158.982	317.575	-0.998236	2.956e-05	0.0029855		-0.998236
TRINITY_DN71613_c0_g2	622.108	1328.46	-1.09451	2.9618e-05	0.0029892		-1.09451
TRINITY_DN62384_c0_g1	972.487	2213.68	-1.18669	3.002e-05	0.003026		-1.18669
TRINITY_DN67700_c0_g1	207.82	587.245	-1.49863	3.0083e-05	0.003026		-1.49863
TRINITY_DN70063_c9_g1	158.679	319.105	-1.00792	3.0098e-05	0.003026		-1.00792
TRINITY_DN77263_c3_g1	175.841	405.052	-1.20383	3.0078e-05	0.003026		-1.20383
TRINITY_DN81042_c1_g1	258.647	572.442	-1.14614	3.0065e-05	0.003026		-1.14614
TRINITY_DN64668_c0_g1	761.769	1402.97	-0.881061	3.0127e-05	0.0030266		-0.881061
TRINITY_DN81503_c0_g1	354.775	676.228	-0.930607	3.0505e-05	0.00306		-0.930607
TRINITY_DN70311_c4_g1	2684.95	4843.01	-0.851006	3.0691e-05	0.0030716		-0.851006
TRINITY_DN78717_c0_g4	3202.37	5769.51	-0.849312	3.0691e-05	0.0030716		-0.849312
TRINITY_DN72396_c2_g2	553.5	1034.09	-0.901713	3.0786e-05	0.0030788		-0.901713
TRINITY_DN84645_c4_g1	1396.6	2538.55	-0.862089	3.0817e-05	0.0030795		-0.862089
TRINITY_DN72640_c1_g3	591.094	1104.72	-0.902217	3.0917e-05	0.0030872		-0.902217
TRINITY_DN74704_c1_g3	1136.54	2070.61	-0.865407	3.112e-05	0.0031028		-0.865407
TRINITY_DN80877_c6_g1	932.617	1762.24	-0.91805	3.112e-05	0.0031028		-0.91805
TRINITY_DN65875_c0_g7	122.706	251.146	-1.03332	3.1157e-05	0.0031041		-1.03332
TRINITY_DN84542_c2_g1	463.542	866.874	-0.903122	3.1222e-05	0.0031068		-0.903122
TRINITY_DN84615_c0_g1	2761.7	4972.31	-0.848358	3.1232e-05	0.0031068		-0.848358
TRINITY_DN69661_c1_g1	713.063	1317.91	-0.886151	3.1435e-05	0.0031247		-0.886151
TRINITY_DN79787_c3_g1	204.513	404.324	-0.98332	3.147e-05	0.0031258		-0.98332
TRINITY_DN71265_c2_g1	373.1	697.048	-0.901695	3.1529e-05	0.0031267		-0.901695
TRINITY_DN83151_c0_g1	1244.29	2262.95	-0.862877	3.1549e-05	0.0031267		-0.862877
TRINITY_DN78053_c5_g2	899.875	1650.65	-0.875242	3.1751e-05	0.0031443		-0.875242
TRINITY_DN60992_c0_g1	48.1316	116.662	-1.27728	3.1778e-05	0.0031446		-1.27728
TRINITY_DN86598_c3_g1	1090.1	1977.52	-0.859232	3.1868e-05	0.0031512		-0.859232
TRINITY_DN81164_c0_g2	8042.67	17732.3	-1.14063	3.1911e-05	0.003153		-1.14063
TRINITY_DN66136_c2_g6	0	181.211	#NUM!	3.1969e-05	0.0031565		#NUM!
TRINITY_DN77520_c1_g1	666.401	1308.35	-0.973286	3.2017e-05	0.0031588		-0.973286
TRINITY_DN83777_c2_g2	1808.65	3279.86	-0.858719	3.2098e-05	0.0031621		-0.858719
TRINITY_DN67904_c4_g2	1177.84	2152.5	-0.869873	3.2155e-05	0.0031633		-0.869873
TRINITY_DN76845_c2_g1	1245.46	2577.84	-1.04948	3.2208e-05	0.0031658		-1.04948
TRINITY_DN69767_c4_g3	4462.07	7995.59	-0.841492	3.236e-05	0.003176		-0.841492
TRINITY_DN83019_c1_g4	230.157	447.042	-0.957795	3.2395e-05	0.0031771		-0.957795
TRINITY_DN39879_c0_g1	216.166	422.517	-0.96687	3.2503e-05	0.0031853		-0.96687
TRINITY_DN66136_c2_g1	0	183.344	#NUM!	3.2727e-05	0.0032049		#NUM!
TRINITY_DN76540_c3_g1	3645.12	6652.3	-0.867885	3.2776e-05	0.0032073		-0.867885
TRINITY_DN78053_c5_g3	1264.49	2320.92	-0.87614	3.2813e-05	0.0032086		-0.87614
TRINITY_DN73075_c3_g1	503.687	946.489	-0.910057	3.2874e-05	0.0032121		-0.910057
TRINITY_DN61382_c0_g1	571.523	1060.6	-0.891995	3.2923e-05	0.0032145		-0.891995
TRINITY_DN69232_c0_g1	2270.95	4106.12	-0.854481	3.2993e-05	0.003219		-0.854481
TRINITY_DN84199_c2_g1	1617.57	2992.87	-0.887701	3.3093e-05	0.0032264		-0.887701
TRINITY_DN69318_c2_g4	352.338	662.035	-0.909948	3.3262e-05	0.003231		-0.909948
TRINITY_DN70079_c2_g1	1219.77	2236.11	-0.874387	3.3185e-05	0.003231		-0.874387
TRINITY_DN85612_c3_g2	28.0605	110.009	-1.97102	3.3245e-05	0.003231		-1.97102
TRINITY_DN87282_c2_g1	657.345	1448.72	-1.14006	3.3201e-05	0.003231		-1.14006
TRINITY_DN78235_c1_g1	245.533	478.127	-0.961475	3.3397e-05	0.0032392		-0.961475
TRINITY_DN78863_c0_g3	1929.61	3486.34	-0.853406	3.3429e-05	0.00324		-0.853406
TRINITY_DN79345_c3_g4	80.4094	175.862	-1.12901	3.3488e-05	0.0032409		-1.12901
TRINITY_DN81136_c1_g2	593.212	1095.83	-0.885403	3.3485e-05	0.0032409		-0.885403
TRINITY_DN83791_c3_g2	440.288	849.562	-0.94827	3.3562e-05	0.0032457		-0.94827
TRINITY_DN74649_c3_g2	491.294	1037.18	-1.07801	3.3661e-05	0.0032505		-1.07801
TRINITY_DN70364_c0_g1	53.926	128.739	-1.25539	3.3721e-05	0.0032516		-1.25539
TRINITY_DN75621_c2_g1	1438.84	2614.29	-0.861513	3.3706e-05	0.0032516		-0.861513
TRINITY_DN83009_c1_g1	1404.13	2543.23	-0.85698	3.3851e-05	0.0032617		-0.85698
TRINITY_DN63812_c0_g1	0	10.31	#NUM!	3.3915e-05	0.0032631		#NUM!
TRINITY_DN65890_c2_g3	12.2695	45.989	-1.90621	3.3907e-05	0.0032631		-1.90621
TRINITY_DN75042_c3_g1	1784.89	3225.52	-0.853697	3.4344e-05	0.0032924		-0.853697
TRINITY_DN70716_c2_g2	31.7413	85.8711	-1.43581	3.4419e-05	0.0032972		-1.43581
TRINITY_DN79215_c1_g2	965.32	1760.84	-0.867188	3.4459e-05	0.0032987		-0.867188
TRINITY_DN86102_c1_g1	996.082	1888.38	-0.92281	3.462e-05	0.0033093		-0.92281
TRINITY_DN86158_c3_g2	2413.33	4351.29	-0.85042	3.4824e-05	0.0033264		-0.85042
TRINITY_DN67612_c0_g1	1348.51	2445.89	-0.858996	3.5048e-05	0.0033429		-0.858996
TRINITY_DN78945_c1_g5	808.504	1485.27	-0.877395	3.5038e-05	0.0033429		-0.877395
TRINITY_DN81523_c1_g1	620.41	1147.13	-0.886741	3.5131e-05	0.0033484		-0.886741
TRINITY_DN81573_c1_g1	521.323	961.21	-0.882674	3.5729e-05	0.0034029		-0.882674
TRINITY_DN76217_c0_g1	609.733	1123.99	-0.882385	3.6104e-05	0.0034361		-0.882385
TRINITY_DN76501_c1_g1	475.072	886.896	-0.900618	3.6129e-05	0.0034361		-0.900618
TRINITY_DN57502_c0_g1	3.54501	31.5166	-3.15225	3.6195e-05	0.0034399		-3.15225
TRINITY_DN81581_c1_g2	650.163	1196.98	-0.880526	3.628e-05	0.0034454		-0.880526
TRINITY_DN85581_c2_g1	1623.53	2917	-0.84535	3.6381e-05	0.0034521		-0.84535
TRINITY_DN87786_c13_g1	38.2756	98.5879	-1.36499	3.6402e-05	0.0034521		-1.36499
TRINITY_DN83760_c0_g1	3209.44	5766.19	-0.845297	3.647e-05	0.003456		-0.845297
TRINITY_DN81485_c0_g1	262.148	507.483	-0.952974	3.6579e-05	0.0034639		-0.952974
TRINITY_DN76894_c2_g3	1039.35	1899.4	-0.869854	3.6636e-05	0.0034644		-0.869854
TRINITY_DN66551_c2_g4	6241.45	11165.7	-0.839125	3.6851e-05	0.0034747		-0.839125
TRINITY_DN66859_c0_g1	1299.16	2608.45	-1.00561	3.6844e-05	0.0034747		-1.00561
TRINITY_DN69371_c1_g1	1.16977	20.2819	-4.11589	3.6825e-05	0.0034747		-4.11589
TRINITY_DN71418_c3_g1	379.832	823.832	-1.11699	3.6809e-05	0.0034747		-1.11699
TRINITY_DN69859_c3_g1	1722.05	3229.72	-0.907284	3.6881e-05	0.003475		-0.907284
TRINITY_DN69927_c3_g4	239.555	574.911	-1.26298	3.7104e-05	0.0034911		-1.26298
TRINITY_DN76815_c1_g1	1922.3	3470.67	-0.852382	3.7097e-05	0.0034911		-0.852382
TRINITY_DN66279_c2_g2	729.138	1512.11	-1.0523	3.7331e-05	0.00351		-1.0523
TRINITY_DN81351_c0_g3	202.152	392.43	-0.956991	3.7396e-05	0.0035136		-0.956991
TRINITY_DN65856_c7_g1	1908.77	3426.79	-0.844214	3.7502e-05	0.003521		-0.844214
TRINITY_DN87766_c15_g2	394.327	814.326	-1.04621	3.7677e-05	0.0035324		-1.04621
TRINITY_DN87610_c3_g3	70.8007	157.643	-1.15482	3.7931e-05	0.0035512		-1.15482
TRINITY_DN64716_c0_g1	1026	1896.82	-0.886558	3.8143e-05	0.0035667		-0.886558
TRINITY_DN86177_c1_g3	528.998	982.277	-0.892869	3.8248e-05	0.0035732		-0.892869
TRINITY_DN78119_c4_g5	238.464	458.863	-0.944291	3.8281e-05	0.0035738		-0.944291
TRINITY_DN65815_c0_g2	1214.58	2195.39	-0.854013	3.8886e-05	0.0036277		-0.854013
TRINITY_DN74661_c0_g1	25.5423	97.204	-1.92812	3.9082e-05	0.0036434		-1.92812
TRINITY_DN74725_c4_g2	863.832	1620.35	-0.907485	3.9239e-05	0.0036555		-0.907485
TRINITY_DN81328_c1_g1	3010.07	5378.1	-0.837296	3.9622e-05	0.0036782		-0.837296
TRINITY_DN87349_c3_g1	2580.57	4642.98	-0.84736	3.961e-05	0.0036782		-0.84736
TRINITY_DN58828_c0_g1	15.3036	59.2642	-1.95329	3.9665e-05	0.0036796		-1.95329
TRINITY_DN84075_c1_g1	4.8231	28.085	-2.54177	3.9757e-05	0.0036856		-2.54177
TRINITY_DN87748_c4_g1	1386.37	2499.28	-0.8502	3.9908e-05	0.0036949		-0.8502
TRINITY_DN79925_c3_g3	3491.84	6222.85	-0.833588	3.9999e-05	0.0037002		-0.833588
TRINITY_DN65049_c0_g1	1676.6	3018.52	-0.848307	4.005e-05	0.0037023		-0.848307
TRINITY_DN80209_c4_g1	1.81645	18.3693	-3.33811	4.0117e-05	0.0037059		-3.33811
TRINITY_DN84954_c5_g2	1281.58	2613.1	-1.02784	4.0156e-05	0.0037069		-1.02784
TRINITY_DN79467_c0_g1	4.12422	51.3686	-3.63869	4.0303e-05	0.0037179		-3.63869
TRINITY_DN64598_c0_g1	1.08707	32.7487	-4.91292	4.0493e-05	0.0037302		-4.91292
TRINITY_DN73789_c2_g1	731.211	1340.49	-0.874401	4.0474e-05	0.0037302		-0.874401
TRINITY_DN78223_c1_g1	8218.91	14669.1	-0.835758	4.0946e-05	0.003764		-0.835758
TRINITY_DN84386_c1_g1	348.651	652.907	-0.905095	4.0935e-05	0.003764		-0.905095
TRINITY_DN81088_c0_g3	221.156	502.815	-1.18496	4.105e-05	0.003771		-1.18496
TRINITY_DN85930_c4_g4	554.46	1132.79	-1.03072	4.1169e-05	0.0037779		-1.03072
TRINITY_DN73338_c2_g1	4.65818	26.694	-2.51867	4.1553e-05	0.0038055		-2.51867
TRINITY_DN76563_c0_g1	5344.12	9525.33	-0.833815	4.157e-05	0.0038055		-0.833815
TRINITY_DN75460_c2_g4	891.351	1701.8	-0.932994	4.1914e-05	0.0038316		-0.932994
TRINITY_DN79058_c8_g1	1483.21	2747.77	-0.889537	4.2107e-05	0.003844		-0.889537
TRINITY_DN69669_c2_g2	1684.38	3025.7	-0.84505	4.2195e-05	0.0038493		-0.84505
TRINITY_DN83238_c1_g4	900.262	1637.54	-0.863111	4.2347e-05	0.0038579		-0.863111
TRINITY_DN77518_c2_g1	287.983	792.132	-1.45976	4.255e-05	0.0038683		-1.45976
TRINITY_DN77950_c1_g1	1808.3	3501.29	-0.953253	4.2607e-05	0.0038683		-0.953253
TRINITY_DN81505_c1_g2	5366.92	9533.83	-0.828962	4.2606e-05	0.0038683		-0.828962
TRINITY_DN83652_c1_g2	2454.93	4385.76	-0.837142	4.2725e-05	0.0038763		-0.837142
TRINITY_DN70073_c1_g1	302.824	568.199	-0.907916	4.2871e-05	0.0038869		-0.907916
TRINITY_DN81275_c0_g1	495.374	918.573	-0.890875	4.3147e-05	0.0039092		-0.890875
TRINITY_DN75624_c1_g1	920.805	1668.09	-0.857231	4.3324e-05	0.0039145		-0.857231
TRINITY_DN82780_c3_g1	1581.77	2898.96	-0.873992	4.3296e-05	0.0039145		-0.873992
TRINITY_DN77601_c1_g3	3254.6	5805.74	-0.835002	4.3398e-05	0.0039185		-0.835002
TRINITY_DN77523_c0_g2	20.0484	64.819	-1.69293	4.3471e-05	0.0039224		-1.69293
TRINITY_DN74017_c2_g2	198.994	385.729	-0.954862	4.3684e-05	0.0039389		-0.954862
TRINITY_DN63400_c0_g1	942.639	1928.44	-1.03266	4.3798e-05	0.0039438		-1.03266
TRINITY_DN86824_c1_g2	1520.1	2723.02	-0.841039	4.3791e-05	0.0039438		-0.841039
TRINITY_DN78730_c1_g1	1619.99	2903.13	-0.841626	4.3941e-05	0.0039513		-0.841626
TRINITY_DN86245_c1_g3	918.914	1659.17	-0.852458	4.4073e-05	0.0039577		-0.852458
TRINITY_DN77360_c7_g4	1578.23	2835.45	-0.845267	4.4244e-05	0.0039704		-0.845267
TRINITY_DN67518_c3_g1	1851.65	3634.68	-0.973021	4.433e-05	0.0039754		-0.973021
TRINITY_DN67795_c1_g1	262.515	497.697	-0.922869	4.4448e-05	0.0039833		-0.922869
TRINITY_DN71408_c1_g1	8.29986	66.916	-3.01119	4.4681e-05	0.0039988		-3.01119
TRINITY_DN75103_c3_g1	1516.13	3027.56	-0.997763	4.4911e-05	0.0040167		-0.997763
TRINITY_DN74725_c3_g2	797.623	1443.4	-0.855687	4.4951e-05	0.0040175		-0.855687
TRINITY_DN79641_c1_g2	1607.26	2877.76	-0.840345	4.5004e-05	0.0040195		-0.840345
TRINITY_DN86752_c0_g1	710.57	1292.97	-0.863639	4.5069e-05	0.0040226		-0.863639
TRINITY_DN63800_c0_g1	535.132	1129.08	-1.07718	4.5259e-05	0.0040307		-1.07718
TRINITY_DN72966_c1_g3	1575.21	2824.02	-0.842211	4.5197e-05	0.0040307		-0.842211
TRINITY_DN76164_c2_g3	13218.5	23553.4	-0.833376	4.5282e-05	0.0040307		-0.833376
TRINITY_DN85961_c1_g1	2838.73	5561.71	-0.970282	4.5244e-05	0.0040307		-0.970282
TRINITY_DN67621_c0_g1	484.497	898.257	-0.890641	4.541e-05	0.0040377		-0.890641
TRINITY_DN74839_c4_g1	1034.95	1872.62	-0.85549	4.5422e-05	0.0040377		-0.85549
TRINITY_DN79516_c0_g2	2235.86	4727.23	-1.08016	4.5701e-05	0.004057		-1.08016
TRINITY_DN80385_c2_g1	3844.62	6812.26	-0.825293	4.567e-05	0.004057		-0.825293
TRINITY_DN82698_c2_g2	1453.63	2599.69	-0.838677	4.5812e-05	0.0040642		-0.838677
TRINITY_DN75966_c3_g2	693.356	1263.81	-0.866116	4.5879e-05	0.0040674		-0.866116
TRINITY_DN63122_c0_g1	89.8172	188.83	-1.07202	4.6376e-05	0.0041087		-1.07202
TRINITY_DN68321_c1_g1	375.751	698.818	-0.89514	4.6541e-05	0.0041205		-0.89514
TRINITY_DN85591_c7_g2	41.4397	155.312	-1.90609	4.6972e-05	0.0041559		-1.90609
TRINITY_DN63636_c0_g1	1014.7	1820.95	-0.843636	4.7199e-05	0.0041648		-0.843636
TRINITY_DN72556_c0_g1	731.337	1329.47	-0.862246	4.7114e-05	0.0041648		-0.862246
TRINITY_DN74704_c2_g1	1193.17	2159.28	-0.855747	4.7179e-05	0.0041648		-0.855747
TRINITY_DN80936_c4_g1	2801.28	4986.09	-0.831822	4.7267e-05	0.004168		-0.831822
TRINITY_DN74421_c3_g2	1827.85	3793.08	-1.05322	4.7359e-05	0.0041734		-1.05322
TRINITY_DN82143_c1_g2	727.095	1321.06	-0.861478	4.7412e-05	0.0041752		-0.861478
TRINITY_DN77878_c0_g4	620.447	1133.44	-0.869326	4.7479e-05	0.0041784		-0.869326
TRINITY_DN74879_c1_g2	1136.5	2044.81	-0.847372	4.756e-05	0.0041799		-0.847372
TRINITY_DN85208_c1_g1	546.417	1006.34	-0.881041	4.7537e-05	0.0041799		-0.881041
TRINITY_DN84645_c4_g2	503.584	922.675	-0.873591	4.8086e-05	0.0042206		-0.873591
TRINITY_DN80157_c3_g4	403.435	748.904	-0.892442	4.8207e-05	0.0042284		-0.892442
TRINITY_DN71561_c4_g1	17.7894	67.2339	-1.91817	4.8334e-05	0.0042367		-1.91817
TRINITY_DN81921_c0_g1	2848.29	5069.81	-0.831839	4.8458e-05	0.0042447		-0.831839
TRINITY_DN77086_c0_g1	1144.65	2056.78	-0.845472	4.864e-05	0.004255		-0.845472
TRINITY_DN74233_c3_g1	949.01	1881.87	-0.987671	4.872e-05	0.0042592		-0.987671
TRINITY_DN64531_c0_g4	918.148	1648.51	-0.844363	4.8985e-05	0.0042738		-0.844363
TRINITY_DN86501_c4_g1	3986.9	7078.67	-0.828211	4.8956e-05	0.0042738		-0.828211
TRINITY_DN73767_c1_g1	1670.84	2992.95	-0.840992	4.9184e-05	0.0042884		-0.840992
TRINITY_DN81297_c1_g3	152.203	310.695	-1.0295	4.9228e-05	0.0042894		-1.0295
TRINITY_DN65875_c0_g1	3082.85	5478.11	-0.829413	4.9377e-05	0.0042996		-0.829413
TRINITY_DN60652_c0_g1	7.75193	36.4671	-2.23397	4.9669e-05	0.0043193		-2.23397
TRINITY_DN72110_c5_g2	1594.28	2847.73	-0.836912	4.9747e-05	0.0043232		-0.836912
TRINITY_DN82794_c0_g2	469.519	866.379	-0.883815	5.0074e-05	0.0043488		-0.883815
TRINITY_DN87265_c4_g1	3215.61	6591.6	-1.03553	5.0276e-05	0.0043635		-1.03553
TRINITY_DN71660_c0_g2	657.641	1194.39	-0.860902	5.0426e-05	0.0043736		-0.860902
TRINITY_DN76058_c2_g1	2504.67	4871.25	-0.959669	5.0548e-05	0.004379		-0.959669
TRINITY_DN87733_c6_g1	4637.14	9035.94	-0.96244	5.0555e-05	0.004379		-0.96244
TRINITY_DN62624_c0_g1	800.091	1478.28	-0.885685	5.0833e-05	0.0044002		-0.885685
TRINITY_DN73794_c4_g1	3276.36	6312.3	-0.946071	5.0885e-05	0.0044018		-0.946071
TRINITY_DN66745_c2_g3	361.844	674.396	-0.898228	5.0991e-05	0.0044081		-0.898228
TRINITY_DN66334_c3_g2	19.289	59.151	-1.61663	5.1214e-05	0.0044194		-1.61663
TRINITY_DN74737_c3_g1	2022.12	4269.93	-1.07834	5.1289e-05	0.0044194		-1.07834
TRINITY_DN82935_c5_g3	753.569	1451.56	-0.945792	5.1256e-05	0.0044194		-0.945792
TRINITY_DN75959_c0_g1	1922.19	4130.07	-1.10341	5.1395e-05	0.0044256		-1.10341
TRINITY_DN83751_c1_g1	857.45	1548.51	-0.852753	5.1455e-05	0.0044279		-0.852753
TRINITY_DN71866_c1_g1	1386.42	2483.61	-0.841072	5.1674e-05	0.0044409		-0.841072
TRINITY_DN76882_c4_g1	15.6721	57.8867	-1.88503	5.1667e-05	0.0044409		-1.88503
TRINITY_DN70409_c1_g2	3776.98	6667.28	-0.819867	5.1758e-05	0.0044422		-0.819867
TRINITY_DN80503_c1_g2	260.566	494.469	-0.924229	5.1772e-05	0.0044422		-0.924229
TRINITY_DN87446_c5_g1	1685.47	3013.64	-0.838356	5.2144e-05	0.0044667		-0.838356
TRINITY_DN64897_c0_g1	2802.48	4985.29	-0.830973	5.2298e-05	0.0044684		-0.830973
TRINITY_DN72225_c5_g1	54.8685	126.037	-1.1998	5.2271e-05	0.0044684		-1.1998
TRINITY_DN83232_c0_g3	78.6144	173.983	-1.14608	5.2252e-05	0.0044684		-1.14608
TRINITY_DN77410_c4_g5	1065.25	2110.65	-0.986492	5.2401e-05	0.0044743		-0.986492
TRINITY_DN83573_c1_g1	1025.59	1867.57	-0.864703	5.2511e-05	0.0044808		-0.864703
TRINITY_DN71645_c2_g1	67.9885	152.605	-1.16644	5.2552e-05	0.0044814		-1.16644
TRINITY_DN66159_c0_g2	763.011	1373.8	-0.848395	5.2662e-05	0.0044864		-0.848395
TRINITY_DN76416_c1_g9	0	154.009	#NUM!	5.2679e-05	0.0044864		#NUM!
TRINITY_DN75875_c0_g1	2129.76	3792.7	-0.832534	5.2855e-05	0.0044957		-0.832534
TRINITY_DN84936_c0_g4	1118.67	2081.74	-0.896007	5.2841e-05	0.0044957		-0.896007
TRINITY_DN65955_c1_g1	19951.2	35131.3	-0.816276	5.2927e-05	0.0044959		-0.816276
TRINITY_DN81014_c3_g2	2371.12	4297.88	-0.858057	5.292e-05	0.0044959		-0.858057
TRINITY_DN63470_c0_g1	4.45582	26.2446	-2.55826	5.3179e-05	0.0045145		-2.55826
TRINITY_DN65339_c0_g1	2520.96	4463.87	-0.824321	5.3278e-05	0.00452		-0.824321
TRINITY_DN79618_c1_g1	2602	4620.28	-0.828359	5.3408e-05	0.0045275		-0.828359
TRINITY_DN80859_c0_g1	1661.44	2956.51	-0.83146	5.3436e-05	0.0045275		-0.83146
TRINITY_DN68064_c3_g1	350.935	968.735	-1.4649	5.3784e-05	0.0045526		-1.4649
TRINITY_DN70076_c0_g3	372.119	923.127	-1.31076	5.3801e-05	0.0045526		-1.31076
TRINITY_DN72016_c1_g2	174.075	383.051	-1.13783	5.3991e-05	0.0045572		-1.13783
TRINITY_DN76172_c2_g1	0	140.67	#NUM!	5.3993e-05	0.0045572		#NUM!
TRINITY_DN80081_c2_g1	2318.47	4105.62	-0.824426	5.3972e-05	0.0045572		-0.824426
TRINITY_DN85460_c0_g5	663.66	1192.62	-0.845618	5.3973e-05	0.0045572		-0.845618
TRINITY_DN83190_c1_g2	1080.99	1939.95	-0.843666	5.4671e-05	0.0046056		-0.843666
TRINITY_DN68190_c0_g2	1673.88	2977.67	-0.830989	5.5086e-05	0.0046376		-0.830989
TRINITY_DN77776_c1_g3	696.026	1261.48	-0.8579	5.532e-05	0.0046543		-0.8579
TRINITY_DN77730_c2_g3	581.728	1060.51	-0.866346	5.546e-05	0.0046602		-0.866346
TRINITY_DN80233_c1_g2	0	135.52	#NUM!	5.5611e-05	0.0046699		#NUM!
TRINITY_DN67889_c3_g3	412.671	754.081	-0.869729	5.5888e-05	0.004687		-0.869729
TRINITY_DN82372_c1_g1	2346.57	4158.71	-0.825586	5.5922e-05	0.004687		-0.825586
TRINITY_DN86356_c0_g1	1587.07	2828.52	-0.833677	5.5886e-05	0.004687		-0.833677
TRINITY_DN81154_c0_g1	2030.64	3602.65	-0.827127	5.5969e-05	0.004688		-0.827127
TRINITY_DN87344_c6_g1	104.174	219.41	-1.07463	5.6173e-05	0.0047021		-1.07463
TRINITY_DN79658_c0_g2	1674.4	2978.4	-0.830889	5.6375e-05	0.0047101		-0.830889
TRINITY_DN75495_c0_g1	1.19021	16.076	-3.75562	5.6776e-05	0.0047376		-3.75562
TRINITY_DN81012_c3_g1	3368.07	5956.14	-0.822457	5.6754e-05	0.0047376		-0.822457
TRINITY_DN86937_c2_g1	11623.3	20484.2	-0.817498	5.6898e-05	0.0047448		-0.817498
TRINITY_DN72288_c0_g2	547.709	1000.1	-0.868661	5.7245e-05	0.0047681		-0.868661
TRINITY_DN75368_c2_g1	2325.51	4102.82	-0.819069	5.725e-05	0.0047681		-0.819069
TRINITY_DN68589_c1_g1	695.128	1305.24	-0.908969	5.7607e-05	0.0047798		-0.908969
TRINITY_DN71665_c0_g1	773.829	1440.77	-0.896754	5.7636e-05	0.0047798		-0.896754
TRINITY_DN72868_c1_g5	1245.71	2220.02	-0.833602	5.7478e-05	0.0047798		-0.833602
TRINITY_DN75354_c5_g2	852.203	1521.62	-0.836343	5.7629e-05	0.0047798		-0.836343
TRINITY_DN82135_c2_g1	2422.91	4280.99	-0.821206	5.7645e-05	0.0047798		-0.821206
TRINITY_DN85670_c0_g1	656.815	1192.47	-0.860397	5.7533e-05	0.0047798		-0.860397
TRINITY_DN78684_c0_g4	1844.31	3275.27	-0.82853	5.7831e-05	0.0047913		-0.82853
TRINITY_DN79836_c0_g2	816.25	1630.12	-0.997897	5.7856e-05	0.0047913		-0.997897
TRINITY_DN87258_c6_g3	1090.38	1944.6	-0.834645	5.7964e-05	0.0047973		-0.834645
TRINITY_DN73505_c1_g1	2010.56	3778.29	-0.910136	5.8013e-05	0.0047983		-0.910136
TRINITY_DN76683_c1_g2	1182.5	2115.69	-0.839287	5.8083e-05	0.0048011		-0.839287
TRINITY_DN80912_c5_g1	1.72856	27.2384	-3.978	5.8121e-05	0.0048012		-3.978
TRINITY_DN78877_c0_g2	80.0917	171.345	-1.09718	5.8351e-05	0.0048172		-1.09718
TRINITY_DN83787_c7_g1	840.574	1508.76	-0.843916	5.8783e-05	0.0048468		-0.843916
TRINITY_DN87581_c3_g2	35.1474	89.2206	-1.34396	5.8774e-05	0.0048468		-1.34396
TRINITY_DN67110_c1_g4	556.326	1002.48	-0.849566	5.8838e-05	0.0048483		-0.849566
TRINITY_DN69181_c4_g1	3042.28	5387.78	-0.82454	5.902e-05	0.0048557		-0.82454
TRINITY_DN75357_c2_g5	1002.81	1791.52	-0.837135	5.9038e-05	0.0048557		-0.837135
TRINITY_DN75748_c1_g1	1138.1	2029.86	-0.83475	5.8968e-05	0.0048557		-0.83475
TRINITY_DN66945_c0_g1	136.969	271.068	-0.984809	5.9119e-05	0.0048563		-0.984809
TRINITY_DN72416_c3_g1	102.549	213.932	-1.06084	5.9116e-05	0.0048563		-1.06084
TRINITY_DN66330_c0_g1	740.877	1330.55	-0.844714	5.9518e-05	0.0048852		-0.844714
TRINITY_DN59630_c0_g1	9.42597	45.6735	-2.27664	5.9681e-05	0.0048934		-2.27664
TRINITY_DN69721_c1_g1	5757.93	10094.2	-0.809907	5.9971e-05	0.0049141		-0.809907
TRINITY_DN76929_c5_g7	44.906	107.817	-1.26361	6.0198e-05	0.0049296		-1.26361
TRINITY_DN80702_c4_g1	1563.93	2766.53	-0.822899	6.0295e-05	0.0049345		-0.822899
TRINITY_DN68434_c1_g2	1722.12	3062.85	-0.83069	6.0727e-05	0.0049668		-0.83069
TRINITY_DN76981_c2_g2	126.538	255.168	-1.01188	6.0811e-05	0.0049703		-1.01188
TRINITY_DN80052_c0_g2	1459.75	2733.79	-0.905184	6.0845e-05	0.0049703		-0.905184
TRINITY_DN84223_c0_g5	141.103	276.466	-0.97035	6.0957e-05	0.0049763		-0.97035
TRINITY_DN81969_c0_g1	751.552	1340.35	-0.834666	6.1717e-05	0.005029		-0.834666
TRINITY_DN83246_c1_g1	4334.2	7623.81	-0.814746	6.1786e-05	0.0050315		-0.814746
TRINITY_DN87441_c6_g1	3974.23	7014.05	-0.819571	6.2148e-05	0.0050579		-0.819571
TRINITY_DN79964_c8_g2	1417.43	2508.31	-0.82344	6.2416e-05	0.0050735		-0.82344
TRINITY_DN87161_c3_g2	470.404	852.76	-0.858239	6.2409e-05	0.0050735		-0.858239
TRINITY_DN65974_c0_g1	866.175	1617.63	-0.901155	6.2589e-05	0.0050736		-0.901155
TRINITY_DN66536_c0_g1	1574.52	2946.75	-0.904209	6.2609e-05	0.0050736		-0.904209
TRINITY_DN71354_c2_g2	1523.04	2703.76	-0.828009	6.2527e-05	0.0050736		-0.828009
TRINITY_DN83477_c1_g3	238.087	447.507	-0.91042	6.2554e-05	0.0050736		-0.91042
TRINITY_DN80798_c2_g3	100.799	209.111	-1.05278	6.2857e-05	0.0050874		-1.05278
TRINITY_DN85647_c1_g3	156.431	308.204	-0.978363	6.2906e-05	0.0050883		-0.978363
TRINITY_DN83675_c3_g3	1994.55	3542.1	-0.828538	6.3113e-05	0.0050987		-0.828538
TRINITY_DN80572_c3_g4	3884.59	6835.77	-0.815342	6.3273e-05	0.0051085		-0.815342
TRINITY_DN84703_c0_g2	162.15	328.879	-1.02023	6.3365e-05	0.0051128		-1.02023
TRINITY_DN81525_c2_g2	1974.54	3485.74	-0.819951	6.347e-05	0.0051182		-0.819951
TRINITY_DN87238_c3_g1	1569.62	3354.86	-1.09583	6.3522e-05	0.0051193		-1.09583
TRINITY_DN68710_c0_g1	1811.54	3188.52	-0.815668	6.3684e-05	0.0051292		-0.815668
TRINITY_DN71820_c1_g2	1456.68	2750.89	-0.917214	6.3804e-05	0.0051294		-0.917214
TRINITY_DN77181_c8_g2	1980	3497.91	-0.820993	6.3731e-05	0.0051294		-0.820993
TRINITY_DN78069_c0_g1	5018.06	8819.92	-0.813636	6.3803e-05	0.0051294		-0.813636
TRINITY_DN77781_c0_g1	757.571	1430.32	-0.916881	6.4086e-05	0.0051458		-0.916881
TRINITY_DN73317_c2_g1	1873.87	3305.17	-0.818707	6.4168e-05	0.0051494		-0.818707
TRINITY_DN84834_c0_g2	300.607	558.73	-0.894275	6.4548e-05	0.0051767		-0.894275
TRINITY_DN66433_c3_g1	8217.81	17188.3	-1.0646	6.463e-05	0.0051801		-1.0646
TRINITY_DN67909_c1_g1	5450.06	9574.03	-0.812855	6.4782e-05	0.005186		-0.812855
TRINITY_DN79748_c0_g1	510.12	918.893	-0.84906	6.4765e-05	0.005186		-0.84906
TRINITY_DN61456_c0_g1	411.724	755.486	-0.875728	6.5739e-05	0.0052562		-0.875728
TRINITY_DN82428_c7_g1	1099.79	1958.03	-0.832175	6.5779e-05	0.0052562		-0.832175
TRINITY_DN64044_c0_g1	36.2324	91.154	-1.33102	6.5915e-05	0.0052639		-1.33102
TRINITY_DN77678_c3_g2	2137.29	3793.95	-0.827921	6.6151e-05	0.0052766		-0.827921
TRINITY_DN79890_c1_g2	36.6884	93.2021	-1.34504	6.6154e-05	0.0052766		-1.34504
TRINITY_DN66846_c5_g1	49.3194	158.184	-1.68138	6.6356e-05	0.0052896		-1.68138
TRINITY_DN73111_c3_g2	162.038	314.596	-0.957172	6.6855e-05	0.0053261		-0.957172
TRINITY_DN75691_c8_g1	57.6871	132.128	-1.19561	6.741e-05	0.0053638		-1.19561
TRINITY_DN72131_c2_g1	1087.95	2333.05	-1.10061	6.7471e-05	0.0053654		-1.10061
TRINITY_DN67479_c1_g2	657.505	1184.86	-0.849638	6.7863e-05	0.0053934		-0.849638
TRINITY_DN72533_c0_g1	4133.32	7250.52	-0.810782	6.8605e-05	0.0054458		-0.810782
TRINITY_DN71634_c2_g1	111.566	225.541	-1.01549	6.8692e-05	0.0054479		-1.01549
TRINITY_DN78029_c3_g1	247.602	549.611	-1.15039	6.8756e-05	0.0054479		-1.15039
TRINITY_DN83477_c1_g2	158.695	310.488	-0.968282	6.8753e-05	0.0054479		-0.968282
TRINITY_DN81232_c0_g1	9.56399	38.0213	-1.99112	6.9356e-05	0.0054856		-1.99112
TRINITY_DN63737_c0_g1	1235.41	2212.23	-0.840513	6.9884e-05	0.0055108		-0.840513
TRINITY_DN66695_c1_g1	863.772	1550.5	-0.844007	6.9827e-05	0.0055108		-0.844007
TRINITY_DN69295_c3_g2	88.0791	183.267	-1.05708	6.9876e-05	0.0055108		-1.05708
TRINITY_DN69458_c5_g1	36212.5	64339.7	-0.82922	6.994e-05	0.005512		-0.82922
TRINITY_DN80771_c2_g2	479.038	871.699	-0.863691	7.0014e-05	0.0055145		-0.863691
TRINITY_DN79578_c1_g3	358.3	767.054	-1.09816	7.0076e-05	0.0055161		-1.09816
TRINITY_DN82143_c1_g1	5184.12	9090.06	-0.810191	7.0528e-05	0.0055484		-0.810191
TRINITY_DN81418_c1_g1	6164.96	10808.4	-0.809989	7.0627e-05	0.0055529		-0.809989
TRINITY_DN77809_c0_g1	2003.64	3534.82	-0.819014	7.0864e-05	0.0055681		-0.819014
TRINITY_DN76624_c2_g2	913.537	1627.91	-0.833482	7.1308e-05	0.0055997		-0.833482
TRINITY_DN73203_c0_g1	1287.58	2614.97	-1.02214	7.1628e-05	0.0056176		-1.02214
TRINITY_DN75839_c3_g2	1475.66	2610.18	-0.822787	7.1663e-05	0.0056176		-0.822787
TRINITY_DN78436_c1_g1	3068.98	6144.8	-1.00161	7.251e-05	0.0056773		-1.00161
TRINITY_DN85313_c1_g3	92.5039	191.658	-1.05095	7.2674e-05	0.0056867		-1.05095
TRINITY_DN77078_c0_g8	602.467	1085.18	-0.848982	7.2739e-05	0.0056884		-0.848982
TRINITY_DN56423_c0_g1	922.857	1637.49	-0.827308	7.293e-05	0.0056903		-0.827308
TRINITY_DN71559_c1_g2	17027.5	29500.9	-0.79289	7.2867e-05	0.0056903		-0.79289
TRINITY_DN76882_c2_g1	1215.63	2337.96	-0.943545	7.2824e-05	0.0056903		-0.943545
TRINITY_DN74560_c0_g1	222.439	421.207	-0.921118	7.3561e-05	0.0057357		-0.921118
TRINITY_DN78258_c2_g4	4012.31	7021.48	-0.807343	7.3704e-05	0.0057435		-0.807343
TRINITY_DN80132_c0_g3	2835.26	5108.09	-0.849305	7.4084e-05	0.0057697		-0.849305
TRINITY_DN84699_c0_g1	1460.35	2708.97	-0.891428	7.426e-05	0.0057731		-0.891428
TRINITY_DN84817_c0_g1	3351.6	5850.67	-0.803751	7.421e-05	0.0057731		-0.803751
TRINITY_DN87423_c2_g1	187.248	575.889	-1.62084	7.449e-05	0.0057872		-1.62084
TRINITY_DN74203_c0_g1	1323.86	2557.77	-0.950136	7.4724e-05	0.0057922		-0.950136
TRINITY_DN78388_c0_g2	909.124	1610.12	-0.824615	7.4719e-05	0.0057922		-0.824615
TRINITY_DN79913_c4_g1	2004.83	3586.99	-0.83929	7.497e-05	0.0058044		-0.83929
TRINITY_DN76428_c1_g2	795.882	1541.8	-0.953993	7.5228e-05	0.0058189		-0.953993
TRINITY_DN83291_c4_g1	1312.07	2731.18	-1.05768	7.531e-05	0.0058189		-1.05768
TRINITY_DN85873_c3_g1	686.227	1226.91	-0.838265	7.5294e-05	0.0058189		-0.838265
TRINITY_DN69807_c5_g1	2314.06	4653.43	-1.00787	7.5602e-05	0.0058363		-1.00787
TRINITY_DN63650_c0_g1	1634.08	2878.81	-0.816992	7.5738e-05	0.0058433		-0.816992
TRINITY_DN71129_c0_g1	458.074	832.106	-0.861187	7.5868e-05	0.0058499		-0.861187
TRINITY_DN66526_c0_g1	508.538	915.496	-0.848197	7.602e-05	0.0058583		-0.848197
TRINITY_DN82435_c3_g1	1577.09	2787.6	-0.821764	7.6294e-05	0.005876		-0.821764
TRINITY_DN64876_c5_g1	2.92444	20.0719	-2.77894	7.6716e-05	0.005905		-2.77894
TRINITY_DN71061_c4_g4	403.448	736.531	-0.868363	7.7323e-05	0.0059447		-0.868363
TRINITY_DN82369_c5_g1	1040.23	1841.16	-0.823717	7.7931e-05	0.0059875		-0.823717
TRINITY_DN84202_c1_g1	204.102	425.083	-1.05845	7.7969e-05	0.0059875		-1.05845
TRINITY_DN67427_c4_g2	19.5883	74.0565	-1.91863	7.8028e-05	0.0059885		-1.91863
TRINITY_DN82140_c0_g2	1855.37	3261.97	-0.814031	7.8568e-05	0.0060229		-0.814031
TRINITY_DN84166_c2_g1	2175.21	4138.07	-0.927805	7.868e-05	0.006028		-0.927805
TRINITY_DN73915_c2_g2	1710.94	3181.81	-0.895057	7.8739e-05	0.0060291		-0.895057
TRINITY_DN61916_c0_g1	3755.73	6694.61	-0.833907	7.8793e-05	0.0060297		-0.833907
TRINITY_DN71151_c0_g1	1932.13	3745.78	-0.955075	7.8838e-05	0.0060297		-0.955075
TRINITY_DN83084_c0_g1	2852.78	5139.31	-0.849207	7.8951e-05	0.0060348		-0.849207
TRINITY_DN62732_c0_g1	357.213	748.422	-1.06707	7.9319e-05	0.0060559		-1.06707
TRINITY_DN76469_c2_g1	444.555	809.618	-0.864879	7.9287e-05	0.0060559		-0.864879
TRINITY_DN73507_c1_g2	2586.88	4509.79	-0.801845	7.9398e-05	0.0060585		-0.801845
TRINITY_DN77874_c1_g3	2872.28	5108.35	-0.830663	7.9705e-05	0.0060784		-0.830663
TRINITY_DN85340_c2_g4	2495.55	4945.28	-0.986694	8.1044e-05	0.0061733		-0.986694
TRINITY_DN71061_c4_g1	732.472	1309.78	-0.838476	8.1396e-05	0.0061894		-0.838476
TRINITY_DN73065_c0_g1	2897.91	5058.78	-0.803774	8.1362e-05	0.0061894		-0.803774
TRINITY_DN87370_c4_g2	1288.54	2415.71	-0.90671	8.1882e-05	0.0062228		-0.90671
TRINITY_DN74288_c3_g5	8209.96	14301	-0.800666	8.2098e-05	0.006232		-0.800666
TRINITY_DN65474_c0_g1	359.783	716.328	-0.993496	8.2312e-05	0.0062376		-0.993496
TRINITY_DN79525_c1_g2	200.45	465.009	-1.21401	8.2304e-05	0.0062376		-1.21401
TRINITY_DN87424_c3_g1	965.732	1712.5	-0.826407	8.2255e-05	0.0062376		-0.826407
TRINITY_DN86258_c3_g1	25.7685	88.0064	-1.772	8.2523e-05	0.0062499		-1.772
TRINITY_DN73280_c4_g2	1108.14	1942.6	-0.809849	8.3014e-05	0.0062835		-0.809849
TRINITY_DN84229_c4_g3	608.102	1096.01	-0.849875	8.3455e-05	0.0063132		-0.849875
TRINITY_DN86610_c1_g2	556.35	994.744	-0.838332	8.3636e-05	0.0063233		-0.838332
TRINITY_DN79940_c1_g1	1677.78	2949.96	-0.814146	8.3943e-05	0.0063392		-0.814146
TRINITY_DN83784_c3_g1	903.596	1600.82	-0.825064	8.3941e-05	0.0063392		-0.825064
TRINITY_DN82040_c1_g2	3382.62	5920.21	-0.807507	8.4356e-05	0.0063668		-0.807507
TRINITY_DN66017_c0_g2	794.274	1406.73	-0.824638	8.4623e-05	0.0063729		-0.824638
TRINITY_DN69879_c2_g1	1111.17	1962.22	-0.82041	8.4629e-05	0.0063729		-0.82041
TRINITY_DN63946_c0_g1	12.6221	61.039	-2.27379	8.4973e-05	0.0063878		-2.27379
TRINITY_DN85777_c0_g1	4863.12	9448.97	-0.958275	8.4957e-05	0.0063878		-0.958275
TRINITY_DN78670_c8_g3	254.57	473.583	-0.895558	8.563e-05	0.0064226		-0.895558
TRINITY_DN73979_c0_g1	108.411	654.29	-2.59342	8.5766e-05	0.0064255		-2.59342
TRINITY_DN87478_c2_g1	3157.46	5810.27	-0.87984	8.575e-05	0.0064255		-0.87984
TRINITY_DN73695_c0_g1	1620.04	2839.57	-0.809644	8.5855e-05	0.0064285		-0.809644
TRINITY_DN72427_c2_g1	0.476084	34.104	-6.16258	8.5996e-05	0.0064318		-6.16258
TRINITY_DN79177_c0_g2	1697.5	2976.87	-0.810383	8.6416e-05	0.0064595		-0.810383
TRINITY_DN79249_c8_g1	135.644	268.043	-0.982635	8.6552e-05	0.006466		-0.982635
TRINITY_DN86462_c1_g1	154.373	299.633	-0.956777	8.6746e-05	0.0064768		-0.956777
TRINITY_DN69839_c6_g1	912.783	1615.58	-0.823707	8.6883e-05	0.0064814		-0.823707
TRINITY_DN80676_c2_g1	1356.48	2381.39	-0.811944	8.6904e-05	0.0064814		-0.811944
TRINITY_DN79335_c2_g2	7044.14	12210.2	-0.793586	8.6964e-05	0.0064821		-0.793586
TRINITY_DN85670_c0_g4	1522.74	2663.57	-0.806692	8.709e-05	0.0064879		-0.806692
TRINITY_DN82490_c1_g1	67.8284	146.4	-1.10995	8.7208e-05	0.006493		-1.10995
TRINITY_DN68184_c1_g1	75.075	261.377	-1.79972	8.7342e-05	0.0064956		-1.79972
TRINITY_DN82624_c3_g2	2065.01	3935.72	-0.93048	8.7342e-05	0.0064956		-0.93048
TRINITY_DN82922_c1_g3	346.162	629.033	-0.861691	8.7529e-05	0.0065043		-0.861691
TRINITY_DN78884_c0_g1	3178.85	5904.84	-0.893393	8.823e-05	0.006547		-0.893393
TRINITY_DN74374_c3_g1	2943.17	5145.75	-0.806011	8.8453e-05	0.0065598		-0.806011
TRINITY_DN78468_c2_g5	1562.2	2730.81	-0.805753	8.8768e-05	0.0065794		-0.805753
TRINITY_DN73328_c2_g1	446.001	803.425	-0.849116	8.885e-05	0.0065818		-0.849116
TRINITY_DN85249_c0_g2	236.459	440.495	-0.897535	8.9122e-05	0.0065983		-0.897535
TRINITY_DN66208_c3_g2	0.584887	12.2754	-4.39146	8.9452e-05	0.0066116		-4.39146
TRINITY_DN78982_c3_g1	2330.65	4070.85	-0.804598	8.9423e-05	0.0066116		-0.804598
TRINITY_DN83867_c4_g2	171.485	401.607	-1.22771	8.9374e-05	0.0066116		-1.22771
TRINITY_DN72708_c3_g1	913.08	1608.97	-0.817326	8.974e-05	0.0066291		-0.817326
TRINITY_DN84792_c4_g1	151.846	648.583	-2.09468	9.0013e-05	0.0066456		-2.09468
TRINITY_DN64709_c0_g2	798.934	1418.44	-0.828157	9.0328e-05	0.0066615		-0.828157
TRINITY_DN72828_c0_g2	447.709	1090.05	-1.28376	9.0412e-05	0.0066615		-1.28376
TRINITY_DN73490_c6_g1	4.1255	23.8209	-2.52959	9.044e-05	0.0066615		-2.52959
TRINITY_DN73568_c3_g1	1327.16	2353.15	-0.826248	9.0582e-05	0.0066615		-0.826248
TRINITY_DN87055_c3_g3	94.8641	195.778	-1.04528	9.0384e-05	0.0066615		-1.04528
TRINITY_DN88125_c0_g1	0	107.835	#NUM!	9.0503e-05	0.0066615		#NUM!
TRINITY_DN78317_c3_g3	1024.36	2031.1	-0.987532	9.0772e-05	0.0066718		-0.987532
TRINITY_DN67905_c4_g1	1266.22	2205.23	-0.800402	9.1114e-05	0.0066909		-0.800402
TRINITY_DN71412_c0_g3	860.452	1524.55	-0.825217	9.1251e-05	0.0066909		-0.825217
TRINITY_DN83340_c8_g3	1515.26	2652.77	-0.807936	9.1148e-05	0.0066909		-0.807936
TRINITY_DN84080_c2_g1	1156.54	2037.59	-0.817052	9.1286e-05	0.0066909		-0.817052
TRINITY_DN83000_c0_g2	3497.25	6078.8	-0.797568	9.1706e-05	0.006718		-0.797568
TRINITY_DN83175_c6_g1	3017.44	5265.95	-0.803369	9.1798e-05	0.006721		-0.803369
TRINITY_DN81999_c2_g1	1836.18	3325.31	-0.856779	9.1925e-05	0.0067266		-0.856779
TRINITY_DN72355_c1_g1	2955.98	5121.77	-0.793005	9.2626e-05	0.0067741		-0.793005
TRINITY_DN63399_c0_g1	1240.26	2352.57	-0.923593	9.2712e-05	0.0067767		-0.923593
TRINITY_DN76158_c3_g1	97.539	230.478	-1.24058	9.3078e-05	0.0067996		-1.24058
TRINITY_DN63448_c0_g2	3045.47	5313.55	-0.80301	9.3222e-05	0.0068064		-0.80301
TRINITY_DN86226_c0_g2	1407.59	2467.04	-0.809552	9.4023e-05	0.0068611		-0.809552
TRINITY_DN69811_c6_g1	1729.33	3734.09	-1.11054	9.4248e-05	0.0068661		-1.11054
TRINITY_DN71712_c0_g1	1482.95	2580.4	-0.799128	9.4152e-05	0.0068661		-0.799128
TRINITY_DN78350_c0_g1	2972.17	5175.64	-0.80022	9.457e-05	0.0068858		-0.80022
TRINITY_DN68509_c3_g1	1921.63	3343.77	-0.799146	9.4881e-05	0.0069046		-0.799146
TRINITY_DN68412_c4_g2	71.9063	241.179	-1.74592	9.4992e-05	0.0069089		-1.74592
TRINITY_DN67991_c0_g1	1202.61	2119.09	-0.817282	9.5067e-05	0.0069105		-0.817282
TRINITY_DN70342_c5_g1	1145.46	2036.01	-0.829821	9.5237e-05	0.0069191		-0.829821
TRINITY_DN85629_c1_g4	757.529	1345.82	-0.82911	9.5337e-05	0.0069225		-0.82911
TRINITY_DN79817_c0_g1	5.88017	36.2601	-2.62445	9.5401e-05	0.0069233		-2.62445
TRINITY_DN74195_c5_g1	966.696	1728.34	-0.838253	9.5575e-05	0.0069321		-0.838253
TRINITY_DN86080_c5_g1	1685.71	2942.38	-0.803631	9.5855e-05	0.0069449		-0.803631
TRINITY_DN65269_c0_g1	3818.38	6636.89	-0.797547	9.6044e-05	0.0069542		-0.797547
TRINITY_DN79413_c2_g1	2532.93	5392.81	-1.09023	9.6142e-05	0.0069542		-1.09023
TRINITY_DN81291_c1_g5	295.02	544.477	-0.884058	9.6096e-05	0.0069542		-0.884058
TRINITY_DN85047_c3_g1	1386.3	2881.48	-1.05557	9.6473e-05	0.0069743		-1.05557
TRINITY_DN65646_c0_g1	9.77074	37.1171	-1.92555	9.8076e-05	0.0070824		-1.92555
TRINITY_DN67099_c5_g1	265.258	505.108	-0.929192	9.8894e-05	0.0071152		-0.929192
TRINITY_DN68309_c8_g1	2108.81	3668.2	-0.798645	9.8659e-05	0.0071152		-0.798645
TRINITY_DN69490_c0_g8	0	102.579	#NUM!	9.8863e-05	0.0071152		#NUM!
TRINITY_DN70284_c0_g1	2353.65	4221.63	-0.8429	9.896e-05	0.0071152		-0.8429
TRINITY_DN72813_c1_g1	3799.42	6576.91	-0.79163	9.887e-05	0.0071152		-0.79163
TRINITY_DN77315_c1_g1	1335.51	2334.02	-0.805426	9.8953e-05	0.0071152		-0.805426
TRINITY_DN85902_c1_g2	959.133	1686.45	-0.814188	9.8806e-05	0.0071152		-0.814188
TRINITY_DN76597_c1_g3	1003.08	1898.58	-0.920486	9.911e-05	0.007122		-0.920486
TRINITY_DN59354_c0_g3	4207.66	7242.02	-0.783373	9.9613e-05	0.0071479		-0.783373
TRINITY_DN66491_c3_g1	0	9.0603	#NUM!	9.9633e-05	0.0071479		#NUM!
TRINITY_DN72501_c0_g1	2069.27	4311.08	-1.05892	0.00010003	0.0071707		-1.05892
TRINITY_DN84239_c2_g1	157.605	359.216	-1.18854	0.00010006	0.0071707		-1.18854
TRINITY_DN79078_c3_g1	1201.66	2100.39	-0.805634	0.00010026	0.0071813		-0.805634
TRINITY_DN79598_c1_g4	1067.97	2108.3	-0.981203	0.00010031	0.0071813		-0.981203
TRINITY_DN67607_c4_g1	1466.31	2552.92	-0.799957	0.00010062	0.007195		-0.799957
TRINITY_DN80936_c3_g2	714.508	1267.78	-0.827288	0.0001006	0.007195		-0.827288
TRINITY_DN87604_c3_g1	1405.36	2505.23	-0.834003	0.00010067	0.007195		-0.834003
TRINITY_DN120940_c0_g1	0	100.771	#NUM!	0.00010107	0.0072194		#NUM!
TRINITY_DN70315_c4_g1	4644.68	8036.72	-0.791029	0.00010114	0.0072194		-0.791029
TRINITY_DN80887_c2_g1	2136.74	3714.74	-0.797848	0.00010118	0.0072194		-0.797848
TRINITY_DN81611_c1_g6	1257.6	2291.33	-0.865505	0.00010147	0.0072368		-0.865505
TRINITY_DN76938_c2_g2	0	8.99341	#NUM!	0.00010186	0.0072605		#NUM!
TRINITY_DN64468_c0_g2	74.7372	158.004	-1.08006	0.00010197	0.0072642		-1.08006
TRINITY_DN79694_c0_g1	1443.21	2525.32	-0.807185	0.00010206	0.007267		-0.807185
TRINITY_DN74221_c4_g4	313.914	575.159	-0.873592	0.00010264	0.0072963		-0.873592
TRINITY_DN63501_c0_g1	1029.02	1813.58	-0.817573	0.00010286	0.0073077		-0.817573
TRINITY_DN82253_c1_g1	3462.11	6012.73	-0.796367	0.00010298	0.0073128		-0.796367
TRINITY_DN67964_c0_g1	316.073	574.891	-0.863031	0.00010356	0.0073471		-0.863031
TRINITY_DN82738_c1_g1	2049.87	3706.58	-0.854554	0.00010358	0.0073471		-0.854554
TRINITY_DN82455_c3_g2	10.6097	76.4528	-2.84918	0.00010365	0.007348		-2.84918
TRINITY_DN84418_c0_g1	146.472	344.956	-1.23579	0.00010386	0.0073592		-1.23579
TRINITY_DN68709_c0_g1	1104.71	1980.1	-0.841904	0.00010421	0.0073764		-0.841904
TRINITY_DN74651_c0_g1	1619.2	2825.29	-0.80312	0.00010421	0.0073764		-0.80312
TRINITY_DN63320_c0_g1	777.592	1430.17	-0.8791	0.00010435	0.0073822		-0.8791
TRINITY_DN70191_c7_g1	3342.91	5784.99	-0.791211	0.00010446	0.0073858		-0.791211
TRINITY_DN66580_c0_g2	548.901	1082.07	-0.979181	0.00010503	0.0074048		-0.979181
TRINITY_DN72907_c1_g3	1122.88	1966.08	-0.808119	0.00010491	0.0074048		-0.808119
TRINITY_DN82592_c3_g1	1082.1	1892.78	-0.806678	0.0001049	0.0074048		-0.806678
TRINITY_DN83349_c0_g2	651.922	1150.56	-0.819559	0.00010506	0.0074048		-0.819559
TRINITY_DN85707_c1_g3	737.215	1337.85	-0.859761	0.00010499	0.0074048		-0.859761
TRINITY_DN84643_c3_g1	1586.59	3177.43	-1.00193	0.00010569	0.0074369		-1.00193
TRINITY_DN72987_c5_g2	656.084	1161.82	-0.824441	0.00010582	0.0074384		-0.824441
TRINITY_DN79306_c1_g2	103.517	205.529	-0.989473	0.00010581	0.0074384		-0.989473
TRINITY_DN71936_c2_g2	419.08	759.777	-0.858352	0.00010623	0.0074628		-0.858352
TRINITY_DN81857_c1_g2	34.5597	85.6367	-1.30914	0.00010674	0.0074908		-1.30914
TRINITY_DN86239_c3_g2	1756.7	3330.35	-0.922808	0.00010696	0.0074983		-0.922808
TRINITY_DN84417_c1_g4	958.407	1672.75	-0.803511	0.00010732	0.0075156		-0.803511
TRINITY_DN72648_c1_g1	1551.42	2781.49	-0.842273	0.00010784	0.0075402		-0.842273
TRINITY_DN75456_c7_g1	2478.99	4281.19	-0.78826	0.00010823	0.0075591		-0.78826
TRINITY_DN75549_c2_g1	1085.61	1892.26	-0.801602	0.00010823	0.0075591		-0.801602
TRINITY_DN77029_c3_g2	134.477	1064.55	-2.98481	0.00010828	0.0075591		-2.98481
TRINITY_DN84032_c2_g3	1661.26	3333.44	-1.00473	0.00010893	0.0075964		-1.00473
TRINITY_DN80243_c7_g1	2168.09	3743.97	-0.788145	0.00010905	0.0076004		-0.788145
TRINITY_DN81363_c0_g2	1049.65	1836.08	-0.806717	0.0001092	0.0076067		-0.806717
TRINITY_DN79287_c1_g1	1247.87	2184.71	-0.807974	0.00010964	0.0076338		-0.807974
TRINITY_DN63145_c0_g1	89.1325	185.05	-1.0539	0.0001098	0.0076408		-1.0539
TRINITY_DN80407_c1_g1	2471.61	4781.41	-0.951983	0.0001099	0.0076435		-0.951983
TRINITY_DN84384_c3_g2	794.641	1394.53	-0.811404	0.00010998	0.007645		-0.811404
TRINITY_DN65901_c0_g2	560.03	981.957	-0.810156	0.00011027	0.0076612		-0.810156
TRINITY_DN65751_c3_g1	1341.71	2332.72	-0.797936	0.00011044	0.0076691		-0.797936
TRINITY_DN74012_c0_g2	0.305495	10.6608	-5.12502	0.00011082	0.0076916		-5.12502
TRINITY_DN65139_c0_g1	692.302	3272.7	-2.24101	0.00011102	0.0076975		-2.24101
TRINITY_DN68355_c2_g1	2321.84	4016.42	-0.790644	0.00011102	0.0076975		-0.790644
TRINITY_DN63926_c0_g1	993.061	1811.53	-0.867255	0.00011127	0.0077105		-0.867255
TRINITY_DN67577_c0_g1	3696.38	6335.45	-0.777336	0.00011159	0.0077284		-0.777336
TRINITY_DN66208_c3_g1	0	9.8641	#NUM!	0.00011165	0.0077286		#NUM!
TRINITY_DN78361_c3_g1	948.704	1675.93	-0.82093	0.00011179	0.0077299		-0.82093
TRINITY_DN69331_c4_g1	1413.05	2457.81	-0.798561	0.00011234	0.0077535		-0.798561
TRINITY_DN84626_c2_g2	2066.97	3590.33	-0.796595	0.00011236	0.0077535		-0.796595
TRINITY_DN87569_c3_g1	1974.71	3425.46	-0.794656	0.00011221	0.0077535		-0.794656
TRINITY_DN82217_c0_g1	1592.53	2752.61	-0.789484	0.00011268	0.0077711		-0.789484
TRINITY_DN83083_c1_g3	4328.22	7462.5	-0.785884	0.00011301	0.0077899		-0.785884
TRINITY_DN66131_c3_g4	1023.57	1788.7	-0.805305	0.00011337	0.0078076		-0.805305
TRINITY_DN66136_c2_g14	0	103.904	#NUM!	0.00011347	0.0078076		#NUM!
TRINITY_DN68239_c0_g1	1279.68	2230.68	-0.8017	0.0001135	0.0078076		-0.8017
TRINITY_DN72621_c0_g3	882.762	1610.38	-0.867302	0.00011347	0.0078076		-0.867302
TRINITY_DN81891_c0_g1	267.34	490.507	-0.875598	0.00011366	0.0078145		-0.875598
TRINITY_DN64631_c0_g1	362.496	655.981	-0.855687	0.0001143	0.0078541		-0.855687
TRINITY_DN86083_c2_g1	3355.87	5769.17	-0.781675	0.00011435	0.0078541		-0.781675
TRINITY_DN87192_c5_g2	1064.69	1846.69	-0.794508	0.00011448	0.0078589		-0.794508
TRINITY_DN76537_c1_g1	6552.95	11291	-0.784959	0.00011466	0.0078671		-0.784959
TRINITY_DN80408_c1_g1	1507.84	2933.89	-0.960329	0.00011517	0.0078947		-0.960329
TRINITY_DN80780_c2_g4	1374.78	2393.38	-0.799845	0.00011518	0.0078947		-0.799845
TRINITY_DN84220_c1_g1	187.872	352.16	-0.906478	0.00011541	0.0079059		-0.906478
TRINITY_DN65377_c0_g1	1154.49	2015.25	-0.803696	0.00011548	0.0079064		-0.803696
TRINITY_DN71726_c0_g1	1898.24	3292.74	-0.794622	0.00011563	0.007909		-0.794622
TRINITY_DN78205_c0_g1	1832.41	3172.43	-0.791849	0.00011563	0.007909		-0.791849
TRINITY_DN74544_c1_g1	2806.3	4848.58	-0.788896	0.00011581	0.0079168		-0.788896
TRINITY_DN75298_c1_g1	2045.15	3871.75	-0.920781	0.00011596	0.0079234		-0.920781
TRINITY_DN71775_c0_g1	1940.06	3361.6	-0.793044	0.0001167	0.0079594		-0.793044
TRINITY_DN72115_c2_g1	1815.78	3144.68	-0.792322	0.0001167	0.0079594		-0.792322
TRINITY_DN77536_c0_g2	2604.62	5537.57	-1.08818	0.00011673	0.0079594		-1.08818
TRINITY_DN63278_c0_g1	578.76	1025.82	-0.825735	0.00011758	0.0080089		-0.825735
TRINITY_DN82170_c3_g5	1606.93	2792.57	-0.797285	0.00011752	0.0080089		-0.797285
TRINITY_DN76958_c0_g1	942.377	2118.28	-1.16852	0.0001178	0.0080174		-1.16852
TRINITY_DN86866_c2_g1	2019.92	3650.38	-0.853751	0.00011782	0.0080174		-0.853751
TRINITY_DN85210_c3_g3	562.498	999.119	-0.828809	0.00011794	0.0080208		-0.828809
TRINITY_DN80893_c4_g1	1593.66	2768.19	-0.796601	0.00011823	0.0080323		-0.796601
TRINITY_DN77744_c2_g3	1631.83	2981.97	-0.869777	0.00011849	0.0080459		-0.869777
TRINITY_DN67966_c2_g1	787.476	1381.32	-0.81074	0.00011871	0.0080571		-0.81074
TRINITY_DN78789_c1_g1	1185.94	2066.54	-0.80119	0.00011883	0.0080611		-0.80119
TRINITY_DN74056_c1_g1	1682.34	2903.42	-0.78729	0.00011947	0.0080962		-0.78729
TRINITY_DN66659_c2_g2	1125.05	1963.63	-0.803533	0.00011972	0.0081023		-0.803533
TRINITY_DN81484_c0_g2	973.504	1703.16	-0.806954	0.0001197	0.0081023		-0.806954
TRINITY_DN85130_c3_g2	466.041	828.855	-0.830662	0.00011975	0.0081023		-0.830662
TRINITY_DN70359_c2_g1	1571.52	2729.29	-0.796365	0.00012006	0.0081155		-0.796365
TRINITY_DN86847_c0_g1	794.916	1396.26	-0.81269	0.00012007	0.0081155		-0.81269
TRINITY_DN78967_c6_g1	2057.53	3697.03	-0.845454	0.00012075	0.0081498		-0.845454
TRINITY_DN81949_c0_g1	730.491	1283.74	-0.813412	0.00012076	0.0081498		-0.813412
TRINITY_DN87183_c1_g2	2564.6	4440.77	-0.792078	0.00012064	0.0081498		-0.792078
TRINITY_DN75555_c0_g3	19.275	56.1804	-1.54333	0.00012114	0.0081643		-1.54333
TRINITY_DN83087_c0_g3	60.1656	131.643	-1.12962	0.00012116	0.0081643		-1.12962
TRINITY_DN85275_c1_g3	1840.53	3178.95	-0.788429	0.00012116	0.0081643		-0.788429
TRINITY_DN79512_c2_g2	622.928	1109.13	-0.83229	0.00012152	0.0081803		-0.83229
TRINITY_DN79570_c1_g1	2282.01	3933.86	-0.785642	0.00012146	0.0081803		-0.785642
TRINITY_DN87114_c2_g2	4120.75	6969.62	-0.758174	0.00012175	0.0081917		-0.758174
TRINITY_DN86229_c3_g1	6566.06	11245	-0.776189	0.00012199	0.0082038		-0.776189
TRINITY_DN73220_c5_g1	199.846	386.195	-0.950439	0.00012292	0.0082576		-0.950439
TRINITY_DN79193_c1_g1	1625.14	2813.45	-0.791777	0.00012312	0.0082668		-0.791777
TRINITY_DN83112_c4_g1	677.276	1189.32	-0.812322	0.00012346	0.0082769		-0.812322
TRINITY_DN77450_c0_g1	2351.68	4168.17	-0.825721	0.00012371	0.0082853		-0.825721
TRINITY_DN86326_c5_g1	1678.2	2903.75	-0.791007	0.00012366	0.0082853		-0.791007
TRINITY_DN82423_c0_g4	637.821	1130.22	-0.825378	0.00012388	0.0082929		-0.825378
TRINITY_DN82170_c3_g2	1034.79	1805.19	-0.802811	0.00012432	0.0083179		-0.802811
TRINITY_DN80334_c1_g1	4810.16	8265.63	-0.78104	0.00012448	0.0083241		-0.78104
TRINITY_DN65395_c0_g4	76.6539	160.119	-1.06271	0.0001251	0.0083489		-1.06271
TRINITY_DN78743_c1_g1	3797.72	6532.73	-0.782553	0.00012498	0.0083489		-0.782553
TRINITY_DN79881_c0_g3	1841.23	3180.43	-0.788554	0.00012509	0.0083489		-0.788554
TRINITY_DN86226_c0_g3	2145.53	3693.98	-0.78384	0.000125	0.0083489		-0.78384
TRINITY_DN64541_c0_g1	1905.25	3547.09	-0.896654	0.00012517	0.0083496		-0.896654
TRINITY_DN77138_c2_g1	6740.55	11572.7	-0.779783	0.00012583	0.0083852		-0.779783
TRINITY_DN80216_c0_g3	1078.98	2376.22	-1.139	0.00012578	0.0083852		-1.139
TRINITY_DN71886_c0_g3	107.923	214.375	-0.990133	0.00012596	0.008389		-0.990133
TRINITY_DN74685_c0_g2	95.4482	191.76	-1.00651	0.00012679	0.0084231		-1.00651
TRINITY_DN75240_c0_g1	4866.98	8333.43	-0.775883	0.00012664	0.0084231		-0.775883
TRINITY_DN78640_c7_g1	5435.03	9328.24	-0.779319	0.00012673	0.0084231		-0.779319
TRINITY_DN87624_c11_g1	3.58197	21.5281	-2.5874	0.00012654	0.0084231		-2.5874
TRINITY_DN76611_c1_g1	2083.44	3596.52	-0.787633	0.000127	0.0084332		-0.787633
TRINITY_DN82885_c0_g1	420.408	802.529	-0.932763	0.00012823	0.0085017		-0.932763
TRINITY_DN81922_c2_g2	83.9643	236.727	-1.49538	0.00012914	0.0085537		-1.49538
TRINITY_DN82063_c1_g1	325.042	587.06	-0.85288	0.00012958	0.0085786		-0.85288
TRINITY_DN64468_c0_g1	139.598	265.817	-0.929156	0.0001298	0.0085843		-0.929156
TRINITY_DN85611_c3_g3	613.627	1103.14	-0.84618	0.00012976	0.0085843		-0.84618
TRINITY_DN85739_c0_g2	3356.34	5751.33	-0.777006	0.00012987	0.0085851		-0.777006
TRINITY_DN66582_c0_g1	2804.2	4830.34	-0.784533	0.0001303	0.0086066		-0.784533
TRINITY_DN79403_c1_g1	2662.04	4575.15	-0.781289	0.0001304	0.0086066		-0.781289
TRINITY_DN84980_c0_g4	275.904	609.359	-1.14313	0.00013046	0.0086066		-1.14313
TRINITY_DN87510_c1_g1	4955.12	8472.01	-0.773786	0.00013035	0.0086066		-0.773786
TRINITY_DN78988_c2_g1	200.817	377.729	-0.91147	0.00013096	0.0086352		-0.91147
TRINITY_DN74173_c0_g2	428.75	765.494	-0.836253	0.00013141	0.0086567		-0.836253
TRINITY_DN82919_c1_g3	831.158	1453.37	-0.806212	0.00013142	0.0086567		-0.806212
TRINITY_DN84803_c3_g3	2146.21	4206.3	-0.970761	0.00013155	0.0086567		-0.970761
TRINITY_DN82160_c3_g1	577.051	1172.82	-1.02321	0.00013201	0.0086829		-1.02321
TRINITY_DN73101_c2_g1	1857.97	3587.38	-0.949206	0.00013221	0.0086916		-0.949206
TRINITY_DN85611_c3_g2	1128.58	2116.91	-0.907445	0.00013236	0.0086971		-0.907445
TRINITY_DN71821_c0_g6	841.198	1473.2	-0.80844	0.00013336	0.0087581		-0.80844
TRINITY_DN74015_c2_g7	1449.64	2516.55	-0.795747	0.00013407	0.0088005		-0.795747
TRINITY_DN81177_c1_g4	15.9616	88.1126	-2.46474	0.00013413	0.0088005		-2.46474
TRINITY_DN65168_c5_g14	0	98.6834	#NUM!	0.00013428	0.0088056		#NUM!
TRINITY_DN83328_c0_g3	2905.34	5005.13	-0.784697	0.00013526	0.0088657		-0.784697
TRINITY_DN76480_c3_g3	3115.58	5410.56	-0.796277	0.00013533	0.008866		-0.796277
TRINITY_DN72973_c5_g1	190.107	350.493	-0.882576	0.00013585	0.0088866		-0.882576
TRINITY_DN82804_c4_g1	806.652	1400.81	-0.796247	0.00013603	0.0088939		-0.796247
TRINITY_DN85796_c0_g1	8109.58	13850.8	-0.772265	0.00013614	0.0088969		-0.772265
TRINITY_DN76361_c4_g2	1402.25	2695.98	-0.943066	0.00013625	0.0088995		-0.943066
TRINITY_DN81588_c3_g1	17.7206	52.5372	-1.56791	0.00013638	0.0089035		-1.56791
TRINITY_DN85254_c0_g2	1317.14	2294.29	-0.800639	0.00013683	0.0089285		-0.800639
TRINITY_DN72317_c5_g4	139.92	267.894	-0.937064	0.00013717	0.0089462		-0.937064
TRINITY_DN83025_c3_g2	405.15	723.453	-0.836443	0.00013758	0.0089687		-0.836443
TRINITY_DN73535_c2_g1	0.517434	36.3693	-6.1352	0.00013834	0.0090139		-6.1352
TRINITY_DN74062_c2_g2	2011.8	4014.32	-0.996669	0.00013857	0.0090243		-0.996669
TRINITY_DN69337_c2_g3	682.543	1194.89	-0.807891	0.00013869	0.0090279		-0.807891
TRINITY_DN71961_c0_g2	1948.92	3357.61	-0.784761	0.0001391	0.0090454		-0.784761
TRINITY_DN75049_c3_g1	471.961	836.231	-0.825234	0.00013905	0.0090454		-0.825234
TRINITY_DN78967_c6_g3	237.718	497.619	-1.06579	0.00013962	0.009075		-1.06579
TRINITY_DN75281_c0_g1	255.167	713.792	-1.48406	0.00014142	0.0091827		-1.48406
TRINITY_DN63679_c0_g1	2028.93	3484.15	-0.780091	0.00014204	0.0092138		-0.780091
TRINITY_DN77744_c3_g1	2187.53	3746.36	-0.776191	0.00014211	0.0092138		-0.776191
TRINITY_DN80519_c1_g2	185.031	345.191	-0.899627	0.00014205	0.0092138		-0.899627
TRINITY_DN75505_c0_g2	1882.72	3235.68	-0.781251	0.00014232	0.0092231		-0.781251
TRINITY_DN73346_c3_g1	2518.97	5183.45	-1.04108	0.00014286	0.0092536		-1.04108
TRINITY_DN85605_c0_g1	377.057	673.606	-0.837121	0.00014342	0.0092808		-0.837121
TRINITY_DN70244_c2_g1	101.993	202.357	-0.988438	0.00014379	0.0092992		-0.988438
TRINITY_DN74879_c1_g4	227.441	419.505	-0.883195	0.00014385	0.0092992		-0.883195
TRINITY_DN68955_c3_g1	389.504	1196.1	-1.61862	0.00014485	0.0093505		-1.61862
TRINITY_DN65761_c5_g1	0	8.76928	#NUM!	0.00014499	0.0093546		#NUM!
TRINITY_DN73994_c0_g1	1326.64	2283.53	-0.783488	0.00014533	0.0093721		-0.783488
TRINITY_DN70814_c6_g2	5991.56	10219.6	-0.770331	0.00014562	0.0093861		-0.770331
TRINITY_DN82450_c0_g1	1679.83	2893.88	-0.784688	0.00014589	0.0093988		-0.784688
TRINITY_DN68286_c1_g2	2564.75	4383.31	-0.7732	0.00014643	0.0094266		-0.7732
TRINITY_DN80930_c0_g2	1841.73	3154.42	-0.77631	0.00014648	0.0094266		-0.77631
TRINITY_DN87377_c5_g3	285.656	532.603	-0.898782	0.0001466	0.0094266		-0.898782
TRINITY_DN87430_c1_g1	2828.34	4845.05	-0.776554	0.0001466	0.0094266		-0.776554
TRINITY_DN85480_c3_g3	463.029	819.861	-0.824278	0.00014747	0.0094775		-0.824278
TRINITY_DN85795_c0_g2	333.753	594.24	-0.832266	0.00014791	0.0094968		-0.832266
TRINITY_DN68968_c0_g2	2105.03	3631.85	-0.786863	0.00014806	0.0094981		-0.786863
TRINITY_DN82396_c1_g5	1008.18	1752.55	-0.797705	0.00014845	0.0095175		-0.797705
TRINITY_DN83939_c0_g1	4113.71	7027.38	-0.772548	0.00014859	0.0095219		-0.772548
TRINITY_DN81898_c1_g1	232.1	459.45	-0.985163	0.00015026	0.0096244		-0.985163
TRINITY_DN71560_c0_g4	129.221	386.452	-1.58045	0.00015107	0.009671		-1.58045
TRINITY_DN72947_c1_g3	275.014	567.157	-1.04425	0.00015122	0.0096716		-1.04425
TRINITY_DN86978_c1_g3	1093.01	1890.05	-0.790119	0.00015118	0.0096716		-0.790119
TRINITY_DN63940_c0_g2	723.441	1261.24	-0.801895	0.00015168	0.0096965		-0.801895
TRINITY_DN82154_c0_g3	2119.9	3625.95	-0.774363	0.00015181	0.0097001		-0.774363
TRINITY_DN76024_c0_g3	1019.51	2046.78	-1.00548	0.0001523	0.0097265		-1.00548
TRINITY_DN71863_c0_g1	1527.72	2779	-0.863182	0.00015246	0.0097322		-0.863182
TRINITY_DN72883_c0_g1	892.871	1546.61	-0.792589	0.00015261	0.0097366		-0.792589
TRINITY_DN68928_c1_g1	4374.69	7453.46	-0.76873	0.00015337	0.0097808		-0.76873
TRINITY_DN75441_c2_g2	3299.52	5626.23	-0.769914	0.00015364	0.009793		-0.769914
TRINITY_DN76418_c2_g1	3497.94	5960.71	-0.768981	0.00015401	0.0098123		-0.768981
TRINITY_DN74601_c1_g4	271.664	494.432	-0.863947	0.00015446	0.009831		-0.863947
TRINITY_DN74983_c8_g1	73.5051	187.846	-1.35363	0.00015484	0.0098505		-1.35363
TRINITY_DN78674_c2_g2	149.707	283.89	-0.923188	0.00015585	0.0099099		-0.923188
TRINITY_DN73983_c4_g3	3758.27	7476.31	-0.992257	0.00015607	0.0099146		-0.992257
TRINITY_DN83532_c1_g1	1308.5	2568.96	-0.973269	0.00015601	0.0099146		-0.973269
TRINITY_DN65754_c5_g3	863.931	1561.32	-0.853774	0.00015687	0.0099604		-0.853774
TRINITY_DN68437_c0_g1	1398.64	3027.79	-1.11424	0.00015707	0.0099684		-1.11424
TRINITY_DN80706_c0_g1	111.818	217.013	-0.956637	0.00015783	0.010012		-0.956637
TRINITY_DN64059_c0_g1	0	78.3075	#NUM!	0.00015821	0.010026		#NUM!
TRINITY_DN81020_c0_g3	1815.46	3108.99	-0.776115	0.00015812	0.010026		-0.776115
TRINITY_DN78598_c1_g1	3675.89	6387.71	-0.797205	0.00015852	0.010041		-0.797205
TRINITY_DN66178_c3_g1	1998.9	3419.55	-0.774603	0.00015869	0.010043		-0.774603
TRINITY_DN87415_c5_g3	564.83	1092.11	-0.951226	0.00015975	0.010095		-0.951226
TRINITY_DN73607_c2_g1	909.208	1570.19	-0.788259	0.00016215	0.010241		-0.788259
TRINITY_DN83603_c4_g4	1776.31	3034.19	-0.77243	0.00016287	0.010282		-0.77243
TRINITY_DN87177_c3_g1	1280.38	2421.84	-0.919533	0.0001638	0.010326		-0.919533
TRINITY_DN85977_c0_g1	7.09648	91.9779	-3.69611	0.00016413	0.010337		-3.69611
TRINITY_DN76514_c1_g1	1838.54	3211.2	-0.80455	0.00016436	0.010347		-0.80455
TRINITY_DN73587_c0_g1	922.946	1901.76	-1.04302	0.00016481	0.01037		-1.04302
TRINITY_DN68337_c3_g2	877.721	1517.36	-0.789726	0.00016543	0.010399		-0.789726
TRINITY_DN72783_c5_g2	0	12.0636	#NUM!	0.00016551	0.010399		#NUM!
TRINITY_DN74840_c2_g2	1300.46	2842.63	-1.1282	0.00016736	0.0105		-1.1282
TRINITY_DN76373_c5_g1	186.097	344.244	-0.887377	0.00016771	0.010517		-0.887377
TRINITY_DN78715_c1_g10	536.545	947.796	-0.820877	0.00016859	0.010547		-0.820877
TRINITY_DN87642_c3_g2	1938.27	3654.81	-0.915031	0.00016909	0.010574		-0.915031
TRINITY_DN85575_c2_g1	1590.93	2816.34	-0.82395	0.00016943	0.010589		-0.82395
TRINITY_DN71433_c1_g1	298.627	581.856	-0.962318	0.00016984	0.010606		-0.962318
TRINITY_DN76078_c0_g2	2350.28	4004.49	-0.76879	0.0001701	0.010606		-0.76879
TRINITY_DN76416_c1_g1	0	88.9959	#NUM!	0.00017005	0.010606		#NUM!
TRINITY_DN85279_c3_g1	2717.36	4811.21	-0.824196	0.00016992	0.010606		-0.824196
TRINITY_DN76358_c1_g2	865.342	1669.95	-0.948464	0.00017068	0.010628		-0.948464
TRINITY_DN78816_c6_g1	2274.35	3865.86	-0.765333	0.00017055	0.010628		-0.765333
TRINITY_DN79688_c0_g2	248.791	1351.78	-2.44185	0.00017062	0.010628		-2.44185
TRINITY_DN87361_c0_g1	5048.22	8555.31	-0.761046	0.00017107	0.010637		-0.761046
TRINITY_DN86262_c1_g1	1767.27	3026.2	-0.775988	0.00017172	0.010668		-0.775988
TRINITY_DN74818_c0_g2	202.716	371.8	-0.875063	0.00017195	0.010676		-0.875063
TRINITY_DN72118_c2_g1	1669.4	2846.32	-0.769764	0.00017237	0.010697		-0.769764
TRINITY_DN77071_c0_g4	215.087	520.88	-1.27603	0.00017283	0.010721		-1.27603
TRINITY_DN75711_c2_g3	312.945	617.487	-0.980499	0.00017348	0.010751		-0.980499
TRINITY_DN84458_c3_g1	84.5861	173.063	-1.0328	0.00017363	0.010751		-1.0328
TRINITY_DN85114_c0_g1	1568.06	2675.84	-0.771013	0.00017361	0.010751		-0.771013
TRINITY_DN77577_c0_g1	2158.11	3680.14	-0.769996	0.00017454	0.010792		-0.769996
TRINITY_DN69393_c1_g4	391.693	701.356	-0.840424	0.00017583	0.010852		-0.840424
TRINITY_DN76479_c2_g2	2642.43	4505.74	-0.769896	0.00017585	0.010852		-0.769896
TRINITY_DN80316_c0_g2	252.046	459.978	-0.867879	0.00017597	0.010855		-0.867879
TRINITY_DN84509_c1_g1	579.507	1295.13	-1.1602	0.0001762	0.01086		-1.1602
TRINITY_DN77843_c0_g1	489.134	849.001	-0.795538	0.00017642	0.010867		-0.795538
TRINITY_DN65172_c0_g1	77.1608	417.798	-2.43687	0.00017653	0.010869		-2.43687
TRINITY_DN78953_c1_g1	1803.55	3069.86	-0.767336	0.0001768	0.010881		-0.767336
TRINITY_DN85090_c3_g1	1209.4	2072.35	-0.776983	0.00017715	0.010897		-0.776983
TRINITY_DN74125_c7_g2	790.151	1359.9	-0.783299	0.00017785	0.01093		-0.783299
TRINITY_DN57361_c0_g1	105.638	208.358	-0.979937	0.00017804	0.010937		-0.979937
TRINITY_DN68609_c2_g1	18.587	53.538	-1.52627	0.00017849	0.010959		-1.52627
TRINITY_DN80432_c1_g5	587.336	1024.09	-0.802091	0.00017861	0.010961		-0.802091
TRINITY_DN75481_c4_g1	2246.65	3841.12	-0.773754	0.00017991	0.011036		-0.773754
TRINITY_DN69736_c10_g2	45.7695	103.293	-1.17428	0.00018013	0.011039		-1.17428
TRINITY_DN82207_c4_g2	1543.07	2639.28	-0.774345	0.00018037	0.011049		-0.774345
TRINITY_DN57297_c0_g1	52.6624	288.044	-2.45144	0.00018054	0.011054		-2.45144
TRINITY_DN82534_c0_g1	647.927	1125.21	-0.796287	0.00018077	0.011063		-0.796287
TRINITY_DN87356_c3_g3	1420.79	2411.33	-0.76314	0.00018116	0.011082		-0.76314
TRINITY_DN83686_c2_g1	1500.61	2569.57	-0.775982	0.00018134	0.011088		-0.775982
TRINITY_DN78708_c0_g4	8.69971	34.0534	-1.96876	0.00018184	0.011113		-1.96876
TRINITY_DN79099_c0_g1	2562.37	4343.15	-0.76126	0.00018282	0.011161		-0.76126
TRINITY_DN85147_c3_g1	1486.14	2532.67	-0.769087	0.00018288	0.011161		-0.769087
TRINITY_DN67737_c0_g1	930.885	1810.39	-0.959629	0.00018385	0.011215		-0.959629
TRINITY_DN80204_c0_g1	329.124	587.063	-0.834884	0.00018426	0.011235		-0.834884
TRINITY_DN86842_c1_g1	130.245	247.383	-0.925522	0.00018454	0.011237		-0.925522
TRINITY_DN82795_c5_g1	1139.89	1945.38	-0.77116	0.00018486	0.011251		-0.77116
TRINITY_DN84499_c0_g1	1443.38	2460.25	-0.769351	0.00018573	0.011294		-0.769351
TRINITY_DN87174_c3_g1	7891.74	13340.7	-0.757422	0.00018575	0.011294		-0.757422
TRINITY_DN82746_c1_g2	955.451	1654.18	-0.791863	0.00018588	0.011297		-0.791863
TRINITY_DN86900_c4_g2	1397.23	2387.6	-0.77299	0.0001861	0.011305		-0.77299
TRINITY_DN67101_c1_g1	3.96888	22.485	-2.50216	0.00018647	0.011322		-2.50216
TRINITY_DN85850_c6_g1	4717.03	7983.01	-0.759055	0.00018661	0.011326		-0.759055
TRINITY_DN70337_c7_g1	900.518	1550.43	-0.783841	0.00018704	0.011347		-0.783841
TRINITY_DN86559_c1_g1	535.839	931.07	-0.797089	0.00018787	0.011387		-0.797089
TRINITY_DN68635_c0_g2	1128.38	1935.76	-0.778644	0.00018864	0.01142		-0.778644
TRINITY_DN78226_c2_g1	3800.36	6422.4	-0.756978	0.00018869	0.01142		-0.756978
TRINITY_DN78996_c3_g2	459.19	801.281	-0.803216	0.00018856	0.01142		-0.803216
TRINITY_DN75523_c0_g2	2115.05	3605.28	-0.769421	0.0001897	0.011471		-0.769421
TRINITY_DN83916_c1_g1	981.537	1966.97	-1.00286	0.00019017	0.011495		-1.00286
TRINITY_DN72775_c6_g1	282.765	509.379	-0.849135	0.00019036	0.0115		-0.849135
TRINITY_DN79088_c0_g2	2886.72	6895.75	-1.25628	0.00019052	0.0115		-1.25628
TRINITY_DN71185_c5_g1	2384.03	4464.88	-0.905222	0.00019127	0.011536		-0.905222
TRINITY_DN76892_c8_g1	2462.15	4178.69	-0.76313	0.00019218	0.011578		-0.76313
TRINITY_DN69836_c1_g1	1315.36	2742.32	-1.05994	0.00019318	0.011634		-1.05994
TRINITY_DN71132_c1_g1	823.875	1534.86	-0.897611	0.00019374	0.011662		-0.897611
TRINITY_DN63817_c0_g1	3.72645	21.7605	-2.54584	0.00019477	0.011713		-2.54584
TRINITY_DN64195_c0_g1	0.838176	371.554	-8.7921	0.00019475	0.011713		-8.7921
TRINITY_DN82815_c0_g1	32.039	79.9064	-1.31848	0.0001953	0.01174		-1.31848
TRINITY_DN84613_c2_g2	392.898	691.128	-0.814797	0.0001954	0.011741		-0.814797
TRINITY_DN70020_c2_g4	311.698	558.7	-0.841926	0.00019625	0.011786		-0.841926
TRINITY_DN71806_c3_g3	798.331	1376.62	-0.78607	0.00019691	0.011821		-0.78607
TRINITY_DN64540_c0_g1	1172.9	2002.91	-0.772015	0.00019767	0.011832		-0.772015
TRINITY_DN79199_c2_g1	2992.19	5152.84	-0.784164	0.00019762	0.011832		-0.784164
TRINITY_DN81356_c5_g1	311.985	560.188	-0.844435	0.00019749	0.011832		-0.844435
TRINITY_DN81420_c2_g1	3145.48	5303.82	-0.753754	0.00019773	0.011832		-0.753754
TRINITY_DN81427_c2_g2	1910.06	3241.81	-0.763181	0.00019771	0.011832		-0.763181
TRINITY_DN81766_c2_g2	895.856	1761.03	-0.975078	0.00019767	0.011832		-0.975078
TRINITY_DN82040_c1_g1	1048.6	1805.31	-0.783783	0.00019786	0.011835		-0.783783
TRINITY_DN74223_c1_g1	868.644	1744.28	-1.00579	0.00019923	0.011906		-1.00579
TRINITY_DN72413_c3_g2	1394.56	2376.55	-0.769063	0.00019989	0.01194		-0.769063
TRINITY_DN63496_c0_g1	1205.09	2049.61	-0.766207	0.00020071	0.011983		-0.766207
TRINITY_DN83061_c0_g1	346.074	828.918	-1.26015	0.00020082	0.011985		-1.26015
TRINITY_DN66865_c4_g1	222.372	420.617	-0.919532	0.00020096	0.011987		-0.919532
TRINITY_DN80718_c1_g2	1132.05	1940.18	-0.777251	0.00020133	0.012004		-0.777251
TRINITY_DN74131_c1_g1	1220.84	2082.53	-0.770457	0.00020257	0.012073		-0.770457
TRINITY_DN83904_c1_g1	4484.4	7573.17	-0.755982	0.00020291	0.012087		-0.755982
TRINITY_DN72259_c2_g1	1985.95	3374.2	-0.764714	0.00020443	0.012172		-0.764714
TRINITY_DN85079_c0_g2	1070.91	1839.19	-0.780237	0.00020567	0.01223		-0.780237
TRINITY_DN86998_c2_g1	6838.56	11529	-0.753509	0.00020752	0.012329		-0.753509
TRINITY_DN72254_c0_g5	1469.07	2510.03	-0.7728	0.00020772	0.01233		-0.7728
TRINITY_DN83868_c4_g2	56.8774	205.916	-1.85613	0.00020783	0.01233		-1.85613
TRINITY_DN77330_c0_g1	548.002	1155.56	-1.07634	0.00020819	0.012346		-1.07634
TRINITY_DN86058_c0_g2	3707.57	6256.27	-0.754829	0.0002084	0.012353		-0.754829
TRINITY_DN61756_c0_g1	1427.46	2598.32	-0.864125	0.00020963	0.012405		-0.864125
TRINITY_DN80460_c3_g1	4770.74	9034.09	-0.921166	0.0002098	0.012405		-0.921166
TRINITY_DN81846_c2_g2	669.177	1186.84	-0.826664	0.00020958	0.012405		-0.826664
TRINITY_DN78313_c3_g1	666.31	1546.8	-1.21502	0.00021015	0.012418		-1.21502
TRINITY_DN78842_c4_g2	2276.01	3849.19	-0.758048	0.00021054	0.012435		-0.758048
TRINITY_DN82636_c1_g1	30.4358	227.982	-2.90508	0.00021072	0.012441		-2.90508
TRINITY_DN75262_c1_g3	5.03504	25.6226	-2.34734	0.00021253	0.012536		-2.34734
TRINITY_DN63078_c0_g1	1504.11	2561.55	-0.768106	0.00021524	0.012684		-0.768106
TRINITY_DN63705_c0_g1	166.378	309.999	-0.897797	0.00021548	0.012684		-0.897797
TRINITY_DN75271_c0_g3	159.446	297.692	-0.900754	0.00021556	0.012684		-0.900754
TRINITY_DN81823_c1_g1	4061.85	6847.25	-0.753389	0.00021552	0.012684		-0.753389
TRINITY_DN86565_c3_g1	3278.21	5519.97	-0.751752	0.00021527	0.012684		-0.751752
TRINITY_DN58928_c0_g1	3.9906	23.3223	-2.54703	0.00021621	0.012713		-2.54703
TRINITY_DN72071_c1_g4	297.627	529.488	-0.831092	0.00021689	0.012748		-0.831092
TRINITY_DN84458_c4_g1	20.6567	57.3134	-1.47226	0.00021718	0.012759		-1.47226
TRINITY_DN87160_c0_g1	7.30323	37.3601	-2.35489	0.00021789	0.012795		-2.35489
TRINITY_DN70094_c0_g1	2087.05	4859.16	-1.21925	0.00021811	0.012802		-1.21925
TRINITY_DN76758_c3_g2	4807.86	8104.28	-0.753288	0.00021838	0.012806		-0.753288
TRINITY_DN77261_c3_g1	862.275	1472.81	-0.772348	0.00021846	0.012806		-0.772348
TRINITY_DN81047_c1_g2	613.955	1409.28	-1.19875	0.00021833	0.012806		-1.19875
TRINITY_DN78323_c0_g1	1262.53	2931.33	-1.21524	0.00021872	0.012815		-1.21524
TRINITY_DN78006_c2_g2	15452.2	25977.6	-0.749454	0.00021985	0.012864		-0.749454
TRINITY_DN73550_c3_g1	704.468	1443.91	-1.03538	0.00021998	0.012866		-1.03538
TRINITY_DN75146_c0_g1	1027.41	1753.18	-0.770966	0.00022027	0.012872		-0.770966
TRINITY_DN64900_c0_g2	392.408	688.408	-0.810909	0.00022071	0.012891		-0.810909
TRINITY_DN67774_c1_g5	1276.08	2247.25	-0.816441	0.0002212	0.012904		-0.816441
TRINITY_DN72660_c4_g1	12162	20459.4	-0.750381	0.00022121	0.012904		-0.750381
TRINITY_DN78261_c1_g2	2563.86	4329.74	-0.755966	0.00022173	0.012929		-0.755966
TRINITY_DN73936_c1_g3	537.593	926.834	-0.785796	0.00022187	0.012931		-0.785796
TRINITY_DN70958_c5_g1	16.2919	49.0734	-1.59079	0.00022212	0.012939		-1.59079
TRINITY_DN78691_c2_g3	1147.6	1955.6	-0.768991	0.00022225	0.012941		-0.768991
TRINITY_DN78849_c0_g1	386.738	681.826	-0.818048	0.00022236	0.012942		-0.818048
TRINITY_DN75278_c1_g2	2889.48	5982.31	-1.04989	0.00022253	0.012947		-1.04989
TRINITY_DN72859_c1_g3	5238.27	10954.1	-1.06431	0.00022464	0.013064		-1.06431
TRINITY_DN85572_c3_g3	73.5409	151.767	-1.04524	0.00022481	0.013067		-1.04524
TRINITY_DN78764_c2_g4	788.228	1349.04	-0.775247	0.00022722	0.013202		-0.775247
TRINITY_DN71366_c5_g1	2.50447	25.3374	-3.33869	0.00022741	0.013207		-3.33869
TRINITY_DN79144_c0_g1	5590.46	9357.6	-0.743173	0.00022768	0.013215		-0.743173
TRINITY_DN79625_c1_g4	1907.73	3247.9	-0.767646	0.00022774	0.013215		-0.767646
TRINITY_DN67161_c0_g1	119.274	280.458	-1.2335	0.00022812	0.013219		-1.2335
TRINITY_DN73238_c6_g1	3578.19	6026.19	-0.752019	0.00022805	0.013219		-0.752019
TRINITY_DN87312_c0_g2	2020.99	3431.94	-0.763959	0.00022792	0.013219		-0.763959
TRINITY_DN85118_c0_g2	553.581	954.648	-0.786174	0.00022972	0.013306		-0.786174
TRINITY_DN75049_c3_g3	579.952	1136.99	-0.971215	0.00023086	0.013367		-0.971215
TRINITY_DN76985_c1_g1	1312.99	2525.21	-0.94355	0.00023152	0.013399		-0.94355
TRINITY_DN67614_c0_g2	0	67.0758	#NUM!	0.00023185	0.013411		#NUM!
TRINITY_DN76239_c4_g1	33.5538	80.5659	-1.26369	0.00023224	0.013419		-1.26369
TRINITY_DN87305_c2_g1	723.882	1246.32	-0.783852	0.00023254	0.013428		-0.783852
TRINITY_DN78630_c0_g1	981.913	1671.86	-0.76779	0.00023267	0.01343		-0.76779
TRINITY_DN85659_c4_g2	3866.63	6479.9	-0.744892	0.00023391	0.01349		-0.744892
TRINITY_DN80479_c1_g1	259.739	464.463	-0.8385	0.00023475	0.01352		-0.8385
TRINITY_DN79868_c2_g1	9263.95	15509.4	-0.743448	0.00023542	0.013535		-0.743448
TRINITY_DN81186_c4_g2	846.869	1455.47	-0.781271	0.00023535	0.013535		-0.781271
TRINITY_DN84514_c4_g1	1926.99	3259.34	-0.758231	0.00023533	0.013535		-0.758231
TRINITY_DN85697_c1_g1	3246.29	5479.76	-0.755321	0.00023537	0.013535		-0.755321
TRINITY_DN65226_c5_g3	330.648	581.551	-0.814609	0.00023567	0.013544		-0.814609
TRINITY_DN68591_c2_g1	923.872	1564.43	-0.759876	0.00023624	0.013567		-0.759876
TRINITY_DN65226_c5_g1	579.165	1087.29	-0.908694	0.00023644	0.01357		-0.908694
TRINITY_DN71280_c0_g1	134.142	261.447	-0.962753	0.00023678	0.013583		-0.962753
TRINITY_DN86073_c1_g2	2531.31	4257.8	-0.750223	0.00023687	0.013583		-0.750223
TRINITY_DN69844_c0_g1	382.359	732.324	-0.937553	0.00023784	0.013632		-0.937553
TRINITY_DN85845_c3_g2	1852.25	3510.44	-0.922369	0.00023792	0.013632		-0.922369
TRINITY_DN78921_c1_g2	2213.03	4527.35	-1.03264	0.00023867	0.013669		-1.03264
TRINITY_DN74601_c1_g1	327.077	580.931	-0.828737	0.00024035	0.013753		-0.828737
TRINITY_DN79649_c4_g5	434.073	751.244	-0.791342	0.0002406	0.013753		-0.791342
TRINITY_DN81295_c0_g1	2707.58	4561.28	-0.752437	0.0002406	0.013753		-0.752437
TRINITY_DN84325_c3_g2	780.612	1336.79	-0.776101	0.00024067	0.013753		-0.776101
TRINITY_DN83188_c2_g6	1657.82	2795.27	-0.7537	0.00024095	0.013757		-0.7537
TRINITY_DN82056_c1_g1	35.5974	99.7738	-1.48689	0.00024134	0.013774		-1.48689
TRINITY_DN61819_c0_g1	0	62.1088	#NUM!	0.00024219	0.013815		#NUM!
TRINITY_DN82850_c1_g2	1353.08	2283.31	-0.754879	0.00024227	0.013815		-0.754879
TRINITY_DN71254_c5_g1	1277.81	2727.35	-1.09383	0.00024269	0.013833		-1.09383
TRINITY_DN64306_c0_g2	233.856	419.062	-0.841545	0.00024437	0.013908		-0.841545
TRINITY_DN81498_c1_g3	887.097	1647.67	-0.89326	0.00024423	0.013908		-0.89326
TRINITY_DN83085_c0_g2	893.654	1516.23	-0.762705	0.00024431	0.013908		-0.762705
TRINITY_DN86900_c4_g1	1733.15	3036.87	-0.809193	0.00024442	0.013908		-0.809193
TRINITY_DN79110_c1_g1	1533.78	2879.89	-0.908919	0.00024497	0.013927		-0.908919
TRINITY_DN77211_c2_g1	288.236	512.895	-0.831411	0.00024543	0.013947		-0.831411
TRINITY_DN72779_c0_g2	1292.14	2178.57	-0.753617	0.00024556	0.013948		-0.753617
TRINITY_DN77616_c2_g1	5.14433	31.6144	-2.61953	0.00024569	0.01395		-2.61953
TRINITY_DN74703_c2_g1	2236.96	3774.84	-0.754877	0.00024593	0.013957		-0.754877
TRINITY_DN69048_c4_g1	2005.91	3384.24	-0.754579	0.00024655	0.01398		-0.754579
TRINITY_DN72719_c1_g1	7.93027	39.8622	-2.32958	0.00024715	0.013996		-2.32958
TRINITY_DN78542_c1_g1	559.627	1095.9	-0.969577	0.00024707	0.013996		-0.969577
TRINITY_DN79931_c1_g1	1052.84	1780.12	-0.757691	0.00024715	0.013996		-0.757691
TRINITY_DN80665_c4_g1	1970.87	3310.35	-0.748146	0.00024943	0.014108		-0.748146
TRINITY_DN85603_c0_g2	231.621	419.509	-0.856932	0.00024945	0.014108		-0.856932
TRINITY_DN69302_c3_g2	1223.64	2072.87	-0.760447	0.00025023	0.014143		-0.760447
TRINITY_DN81481_c3_g2	116.375	225.749	-0.955941	0.00025028	0.014143		-0.955941
TRINITY_DN78149_c3_g1	1334.65	2535.71	-0.92593	0.00025085	0.01417		-0.92593
TRINITY_DN85632_c1_g1	136.691	256.774	-0.909583	0.00025166	0.014209		-0.909583
TRINITY_DN68256_c0_g7	0	80.9757	#NUM!	0.000252	0.014218		#NUM!
TRINITY_DN77873_c0_g5	148.388	382.89	-1.36755	0.00025203	0.014218		-1.36755
TRINITY_DN67641_c4_g2	1122.06	1967.25	-0.810036	0.00025254	0.014234		-0.810036
TRINITY_DN76408_c4_g2	37.9975	88.5442	-1.22049	0.00025247	0.014234		-1.22049
TRINITY_DN72372_c0_g2	38.3644	90.3449	-1.23568	0.00025346	0.01428		-1.23568
TRINITY_DN80162_c1_g2	3831.2	6421.63	-0.745145	0.00025493	0.014357		-0.745145
TRINITY_DN87230_c4_g1	501.379	866.938	-0.790027	0.00025525	0.014369		-0.790027
TRINITY_DN72051_c4_g2	110.732	215.252	-0.958956	0.00025611	0.014411		-0.958956
[truncated: 912 more rows]
